# Supplementary material for: In silico prediction of linear free energy relationship descriptors of neutral and ionic compounds
Source: Royal Society of Chemistry journal article supplement (doi:10.1039/c5ra13595h), 2015-01-01
Supplement: c5ra13595h1.xlsx [file c5ra13595h1.xlsx]

## Sheet: Test Set
Table S1 Subparameters of test set. Type A=monovalent anion, C=monovalent cation, DA=divalent anion, N=neutral compounds
	Type		LFER descriptors								Sub-parameters
Chemical			E	S	A	B	V	J+	J-		No. Ring	PSA	MR	Evdw	MW/100	NOH	NHN	Cosmo-Vol./100	Sig1/100	Sig2/100	Sig3/100	sig4/100	Sig5/100	Sig6/100	HBD1	HBD2	HBD3	HBD4	HBA2	HBA3	HBA4
2,3-DimethylPX-	A	Test Set	1	2.8	0	2.27	1.0354	0	1.7		1	17.07	36.651	-5.899	1.212	0	0	1.61	1	1.695	3.094	6.511	14.495	33.395	0	0	0	0	31.5894	23.6635	18.187
2,4-DichloroPX-	A	Test Set	1.11	4.45	0	2.49	0.9984	0	2.75		1	17.07	37.686	-6.896	1.62	0	0	1.6397	1	1.43	2.236	4.446	9.17	19.697	0	0.0051	0	0	23.3677	18.5379	14.152
2,4-DinitroPX-	A	Test Set	1.35	6.64	0	2.25	1.102	0	2.476		1	116.39	41.143	-4.954	1.831	0	0	1.8302	1	1.47	1.742	2.781	4.288	7.281	0	0.0399	0	0	20.5655	12.4838	6.961
2,5-DimethylPX-	A	Test Set	0.99	2.8	0	2.32	1.0354	0	1.7		1	17.07	36.651	-6.007	1.212	0	0	1.6196	1	1.7	3.131	6.652	14.939	34.702	0	0	0	0	31.7598	23.9373	18.504
2,6-Dibromo-4-nitroPX-	A	Test Set	1.71	8.7	0	2.65	1.2778	0	3.95		1	66.73	50.359	-7.955	2.959	0	0	2.0687	1	1.251	1.452	2.175	3.236	5.227	0	0.0361	0	0	16.9239	9.8543	5.123
2,6-Dibuthoxybenzoate-	A	Test Set	1	4.31	0	3.51	2.1548	0	2.418		1	58.59	73.285	-11.052	2.653	0	0	3.4104	1	2.362	3.965	8.033	16.396	34.678	0	0	0	0	47.8278	36.5141	26.137
2,6-Diethoxybenzoate-	A	Test Set	1.02	4.09	0	3.5	1.5912	0	2.377		1	58.59	54.057	-8.042	2.092	0	0	2.5163	1	2.478	4.232	8.793	18.242	39.278	0	0.0012	0	0	50.3852	39.0877	28.532
2,6-Diiodobenzoate-	A	Test Set	2.16	5.28	0	3.22	1.4266	0	2.678		1	40.13	56.893	-9.159	3.729	0	0	2.2411	1	1.85	2.848	5.644	10.818	21.665	0	0.0264	0	0	35.9255	27.6689	19.621
2,6-Dimethoxybenzoate-	A	Test Set	1.03	4.27	0	3.51	1.3094	0	2.527		1	58.59	44.443	-6.853	1.812	0	0	2.1083	1	2.418	3.977	8.122	16.468	34.826	0	0.0003	0	0	47.9701	36.5396	26.245
2,6-DimethylPX-	A	Test Set	0.99	2.8	0	2.32	1.0354	0	1.7		1	17.07	36.651	-5.999	1.212	0	0	1.6107	1	1.586	2.806	5.765	12.587	28.482	0	0	0	0	28.6767	21.3251	16.232
2,6-DinitroPX-	A	Test Set	1.37	5	0	1.91	1.102	0	1.619		1	116.39	40.086	-4.979	1.831	0	0	1.8153	1	1.524	1.795	2.72	3.956	6.267	0	0	0	0	21.842	12.0184	5.738
2,6-Di-tertbutyl-4-nitroPX-	A	Test Set	1.2	4.45	0	2.04	2.055	0	1.61		1	66.73	72.555	-9.496	2.503	0	0	3.1726	1	1.235	1.502	2.175	3.299	5.211	0	0	0	0	18.0737	10.3949	5.025
2-BromoPX-	A	Test Set	1.19	3.78	0	2.36	0.9286	0	2.29		1	17.07	34.907	-6.228	1.72	0	0	1.4797	1	1.532	2.48	4.889	10.189	22.109	0	0	0	0	24.9596	19.3322	14.874
2-Chloro-4-phenylPX-	A	Test Set	1.8	6.02	0	2.81	1.4838	0	3.263		2	17.07	57.377	-8.762	2.037	0	0	2.3442	1	1.598	2.182	4.266	8.461	17.839	0	0	0	0	22.6377	17.7399	13.371
2-ChloroPX-	A	Test Set	1	2.98	0	2.2	0.876	0	1.76		1	17.07	31.833	-5.759	1.276	0	0	1.4177	1	1.549	2.554	5.083	10.678	23.312	0	0	0	0	25.8298	20.0066	15.437
2-Cyanobenzoate-	A	Test Set	1.01	4.37	0	2.89	1.0649	0	2.315		1	63.92	36.174	-5.462	1.461	0	0	1.6934	1	1.926	3.051	5.944	11.466	23.314	0	0.019	0	0	38.1528	27.6409	18.749
2-EthylPX-	A	Test Set	0.98	2.73	0	2.32	1.0354	0	1.689		1	17.07	36.651	-5.972	1.212	0	0	1.6259	1	1.626	2.91	6.041	13.323	30.485	0	0	0	0	29.6299	22.0253	16.912
2-IodoPX-	A	Test Set	1.51	5.49	0	2.74	1.0118	0	3.032		1	17.07	40	-6.822	2.19	0	0	1.5826	1	1.51	2.393	4.682	9.704	20.975	0	0	0	0	23.8735	18.4478	14.224
2-Methyl-4,6-dinitroPX-	A	Test Set	1.35	5.5	0	2.02	1.2429	0	1.94		1	116.39	45.95	-5.617	1.971	0	0	2.0141	1	1.443	1.748	2.548	3.747	5.863	0	0.0009	0	0	20.3528	11.1033	5.273
2-Nitrobenzoate-	A	Test Set	1.14	3.92	0	2.96	1.0844	0	2.132		2	59	33.814	-5.166	1.661	0	0	1.7651	1	2.004	3.032	5.819	10.839	21.32	0	0.0287	0	0	37.9823	27.8225	19.08
3,4-Dichlorobenzoate-	A	Test Set	1.1	3.04	0	2.49	1.155	0	2.11		1	40.13	41.479	-7.275	1.9	0	0	1.8848	1	1.758	3.039	6.206	12.671	26.804	0	0.0277	0	0	37.0362	28.8558	20.894
3,4-Dimethylbenzoate-	A	Test Set	0.88	3.4	0	2.92	1.192	0	2.251		1	40.13	41.391	-6.431	1.492	0	0	1.8763	1	2.014	3.708	7.84	16.995	37.99	0	0	0	0	41.9519	33.5711	25.457
3,4-DinitroPX-	A	Test Set	1.47	7.43	0	2.35	1.102	0	2.99		1	116.39	41.143	-4.925	1.831	0	0	1.829	1	1.424	1.661	2.605	3.928	6.579	-0.0001	0.0855	0.0004	0	19.4184	11.607	6.225
3,5-Dimethylbenzoate-	A	Test Set	0.88	3.44	0	2.94	1.192	0	2.249		1	40.13	41.391	-6.526	1.492	0	0	1.8785	1	1.982	3.627	7.601	16.343	36.224	0	0	0	0	41.2863	32.9308	24.836
3,5-Dinitrobenzoate-	A	Test Set	1.4	4.71	0	2.66	1.2586	0	2.005		1	139.45	45.942	-5.452	2.111	0	0	2.0675	1	1.986	2.752	5.306	9.687	19.32	-0.0005	0.1003	0.0041	0	33.6699	24.5308	16.611
3-AcetylPX-	A	Test Set	1.13	4.9	0	2.39	1.0511	0	1.922		1	34.14	36.851	-5.762	1.351	0	0	1.6621	1	1.843	3.125	6.356	13.434	29.565	0	0	0	0	33.7971	25.5832	18.822
3-Bromobenzoate-	A	Test Set	1.15	3.47	0	2.56	1.0852	0	2.197		1	40.13	39.159	-6.753	2	0	0	1.7333	1	1.83	3.139	6.447	13.244	28.193	0	0.009	0	0	37.859	29.641	21.647
3-Chlorobenzoate-	A	Test Set	0.99	3.13	0	2.57	1.0326	0	2.034		1	40.13	36.469	-6.275	1.556	0	0	1.6688	1	1.828	3.159	6.5	13.382	28.536	0	0.012	0	0	38.0648	29.8315	21.825
3-CHOPX-	A	Test Set	1.14	4.58	0	2.32	0.9102	0	2.039		1	34.14	32.044	-5.119	1.211	0	0	1.4578	1	1.739	2.952	5.923	12.391	26.916	0	0	0	0	32.2163	24.3883	17.84
3-CyanoPX-	A	Test Set	1.08	3.5	0	2.3	0.9083	0	1.7		1	40.86	31.593	-5.059	1.181	0	0	1.4498	1	1.626	2.671	5.287	10.899	23.399	0	0	0	0	28.7669	21.7729	16.127
3-Fluorobenzoate-	A	Test Set	0.95	2.96	0	2.73	0.9279	0	2.175		1	40.13	31.417	-5.154	1.391	0	0	1.5301	1	1.859	3.247	6.723	13.969	30.093	0	0.012	0	0	38.6804	30.4281	22.408
3-Hydroxylbenzoate-	A	Test Set	1.06	3.65	0.13	3.07	0.9689	0	2.344		1	60.36	33.482	-5.15	1.371	1	0	1.5491	1	2.272	3.263	8.021	14.441	35.524	-0.0484	4.8697	3.3635	2.0085	42.0505	32.5747	23.886
3-IodoPX-	A	Test Set	1.52	5.34	0	2.72	1.0118	0	3.17		1	17.07	40	-6.859	2.19	0	0	1.5884	1	1.531	2.5	4.996	10.471	22.725	0	0	0	0	25.5643	20.3003	15.789
3-Methoxybenzoate-	A	Test Set	0.98	3.32	0	3	1.1098	0	2.254		1	49.36	37.951	-6.005	1.511	0	0	1.7685	1	2.097	3.587	7.458	15.632	34.127	0	0.0025	0	0	41.8032	32.5673	24.078
3-Methylbenzoate-	A	Test Set	0.88	3.25	0	2.85	1.0511	0	2.228		1	40.13	36.425	-5.823	1.351	0	0	1.6626	1	1.962	3.569	7.47	15.972	35.215	0	0	0	0	40.9603	32.6212	24.535
3-NHCOMe-benzoate-	A	Test Set	1.27	3.53	0.31	3.34	1.3075	0	2.188		1	69.23	45.772	-6.647	1.782	0	1	2.0676	1	2.454	3.715	8.156	15.612	34.482	-0.0236	2.3869	1.3246	0.5294	48.0685	36.2876	25.367
3-Nitrobenzoate-	A	Test Set	1.14	3.6	0	2.79	1.0844	0	2.217		1	89.79	38.701	-5.277	1.661	0	0	1.7535	1	1.951	3.115	6.216	12.263	25.506	0	0.0321	0	0	37.4727	28.3341	20.127
3-Phenoxybenzoate-	A	Test Set	1.54	3.54	0	2.78	1.5767	0	2.088		2	49.36	57.975	-8.414	2.132	0	0	2.5134	1	2.14	3.414	7.239	15.061	32.94	0	0.0106	0	0	40.2915	31.6213	23.481
3-Trifluoromethyl-4-nitroPX-	A	Test Set	0.84	6.08	0	2.23	1.1218	0	2.529		1	66.73	39.617	-5.416	2.061	0	0	1.9288	1	1.322	1.754	2.84	4.677	8.12	0	0.0002	0	0	21.882	13.8651	7.942
3-TrifluoromethylPX-	A	Test Set	0.57	3.55	0	2.35	0.9476	0	1.98		1	17.07	32.035	-5.297	1.611	0	0	1.6346	1	1.481	2.538	5.26	11.357	25.231	0	0	0	0	26.1243	21.1491	16.626
4-Aminobenzoate-	A	Test Set	1.23	4.07	0.25	3.26	1.01	0	2.357		1	66.15	35.863	-5.312	1.361	0	2	1.5913	1	2.438	3.838	9.074	18.648	43.805	-0.03	3.104	1.213	0.275	45.6	36.353	27.628
4-BromoPX-	A	Test Set	1.23	3.5	0	2.46	0.9286	0	2.3		1	17.07	35.964	-6.22	1.72	0	0	1.4765	1	1.601	2.757	5.749	12.531	28.222	0	0	0	0	27.5578	22.1709	17.583
4-ChloroPX-	A	Test Set	1.07	2.95	0	2.38	0.876	0	2.02		1	17.07	32.89	-5.748	1.276	0	0	1.4134	1	1.609	2.804	5.887	12.913	29.254	0	0	0	0	27.9525	22.497	17.892
4-CHOPX-	A	Test Set	1.16	6.08	0	2.44	0.9102	0	2.436		1	34.14	33.101	-5.114	1.211	0	0	1.4559	1	1.61	2.521	4.556	8.479	16.318	0	0	0	0	30.8146	22.5557	14.95
4-CyanoPX-	A	Test Set	1.09	4.4	0	2.31	0.9083	0	1.78		1	40.86	32.65	-5.053	1.181	0	0	1.4482	1	1.588	2.431	4.505	8.601	17.207	0	0	0	0	28.246	20.366	13.957
4-Fluorobenzoate-	A	Test Set	0.95	2.82	0	2.82	0.9279	0	2.174		1	40.13	31.417	-5.148	1.391	0	0	1.5278	1	1.907	3.384	7.134	15.062	33.007	0	0.019	0	0	39.875	31.589	23.544
4-Hydroxybenzoate-	A	Test Set	1.08	3.78	0.04	3.05	0.9689	0	2.382		1	60.36	33.482	-5.137	1.371	1	0	1.5482	1	2.354	3.453	8.726	16.14	40.67	-0.0513	5.1701	3.6118	2.2245	43.6856	34.2622	25.615
4-IodoPX-	A	Test Set	1.53	5	0	2.7	1.0118	0	3.042		1	17.07	41.057	-6.845	2.19	0	0	1.584	1	1.6	2.726	5.672	12.323	27.672	0	0	0	0	27.3804	21.978	17.402
4-Methoxybenzoate-	A	Test Set	1.05	4	0	3.05	1.1098	0	2.4		1	49.36	37.951	-6.009	1.511	0	0	1.7684	1	2.16	3.783	8.068	17.345	38.849	0	0.0023	0	0	43.267	34.0983	25.661
4-Methylbenzoate-	A	Test Set	0.88	3.1	0	2.88	1.0511	0	2.167		1	40.13	36.425	-5.823	1.351	0	0	1.6617	1	1.978	3.62	7.613	16.355	36.213	0	0	0	0	41.4004	33.0441	24.945
4-Methylthiophenol-	A	Test Set	1.1	3.03	0	1.85	0.9993	0	2.272		1	32.09	40.018	-6.651	1.161	0	0	1.4873	1	0.807	0.766	0.819	0.957	1.194	0	0	0	0	5.6198	2.2604	0.611
4-Nitrobenzoate-	A	Test Set	1.14	3.5	0	2.79	1.0844	0	2.212		1	89.79	38.701	-5.272	1.661	0	0	1.7523	1	1.954	3.101	6.193	12.185	25.315	0	0.0423	0	0	37.3759	28.2411	20.04
4-SH-benzoate-	A	Test Set	1.37	3.44	0	2.85	1.0737	0	2.191		1	78.93	38.711	-6.478	1.532	0	0	1.7312	1	2.087	3.442	7.5	15.581	34.658	-0.0062	0.7231	0.1273	0.0009	40.6603	32.2611	24.183
4-tert-butylbenzoate-	A	Test Set	0.88	3.16	0	2.88	1.4738	0	2.229		1	40.13	50.729	-7.533	1.772	0	0	2.3058	1	2.004	3.63	7.623	16.372	36.228	0	0	0	0	41.4499	33.0899	24.985
Acetate-	A	Test Set	0.42	2.22	0	2.93	0.4433	0	2.075		0	40.13	11.558	-2.638	0.59	0	0	0.7236	1	2.045	4.259	9.274	20.634	46.856	0	0	0	0	48.2247	38.9966	30.098
Butanoate-	A	Test Set	0.36	2.18	0	3.05	0.7251	0	2.02		0	40.13	21.172	-4.102	0.871	0	0	1.1541	1	2.028	4.222	9.261	20.822	47.858	0	0	0	0	47.2413	38.2299	29.602
Captopril-	A	Test Set	1.3	4.39	0	3.91	1.5985	0	2.339		1	99.24	51.703	-8.207	2.163	0	0	2.6147	1	2.508	4.206	8.681	17.698	37.972	-0.0006	0.199	0.0036	0	51.6941	39.0421	27.588
Chloroacetate-	A	Test Set	0.58	2.44	0	2.56	0.5657	0	1.86		0	40.13	16.354	-3.856	0.935	0	0	0.9489	1	1.843	3.187	6.229	12.242	24.82	0	0.0055	0	0	38.8096	29.6846	21.126
CN-	A	Test Set	0.07	1.99	0	1.86	0.231	0	1.63		0	23.79	6.67	-1.89	0.26	0	0	0.4312	1	1.685	2.897	5.08	9.07	16.468	0	0	0	0	39.3575	27.3457	16.581
Dichloroacetate-	A	Test Set	0.63	2.53	0	2.18	0.6881	0	1.426		0	40.13	21.15	-4.974	1.279	0	0	1.1899	1	1.591	2.499	4.615	8.386	15.96	-0.0013	0.243	0.0108	0	32.1588	23.6712	15.726
F-	A	Test Set	-0.05	3.76	0	2.42	0.105	0	2.385		0	0	2.22	-0.985	0.19	0	0	0.2131	1	2.7	7.2	19	52	14	0	0	0	0	63	55	48
Flurbiprofen-	A	Test Set	1.59	4.56	0.07	3.36	1.8174	0	2.538		2	40.13	66.246	-9.39	2.433	0	0	2.9055	1	2.122	3.426	7.227	14.994	32.375	0	0.0022	0	0	40.5177	32.1488	24.027
Fumaricacid-	A	Test Set	0.86	3.45	0.08	2.85	0.7565	0	2.087		0	80.26	20.527	-3.89	1.151	1	0	1.2571	1	2.216	2.89	6.69	10.044	23.746	-0.0513	5.1359	3.561	2.2316	41.6233	29.6426	19.51
Hydroxyaceatate-	A	Test Set	0.48	2.45	0.01	2.67	0.502	0	1.689		0	60.36	12.719	-2.645	0.75	0	0	0.8113	1	1.873	3.33	6.36	12.283	24.321	0	0.0295	0	0	42.3734	31.7019	21.713
I-	A	Test Set	0.38	3.55	0	1.34	0.408	0	1.251		0	0	15.132	-3.921	1.269	0	0	0.5231	1	1.479	2.188	3.237	4.789	7.084	0	0	0	0	32.399	18.8788	6.591
Ibuprofen-	A	Test Set	0.88	3.5	0.08	3.31	1.7556	0	2.419		1	17.07	60.239	-8.851	2.053	0	0	2.766	1	2.055	3.75	7.908	17.058	37.83	0	0	0	0	42.437	33.9905	25.809
Indomethacin-	A	Test Set	2.39	5.62	0.1	4.38	2.5084	0	2.99		3	82.22	95.236	-12.928	3.588	0	0	4.2768	1	2.012	2.22	4.161	7.283	15.268	-0.0037	0.495	0.1571	0.0364	26.1029	15.2575	8.717
Isobutanoate-	A	Test Set	0.35	1.61	0	2.97	0.7251	0	1.992		0	40.13	21.172	-4.034	0.871	0	0	1.1541	1	1.958	4.035	8.786	19.632	44.845	0	0	0	0	45.234	36.5845	28.301
Ketoprofen-	A	Test Set	1.8	5.49	0.01	3.39	1.9564	0	2.538		2	34.14	70.726	-9.839	2.533	0	0	3.0763	1	2.332	3.671	7.647	15.58	33.401	0	0.0012	0	0	44.647	33.8048	24.264
Maleicacid-	A	Test Set	0.86	0.97	0	1.91	0.7565	0	0.625		0	80.26	20.527	-3.714	1.151	1	0	1.2088	1	1.639	2.397	3.934	6.399	10.751	0	0.0037	0	0	32.8498	21.3446	11.481
Meloxicam-	A	Test Set	2.75	6.5	0.08	4.18	2.2941	0	2.857		3	133.06	82.57	-11.367	3.504	0	1	3.6857	1	1.958	2.258	3.912	6.288	11.219	0	0.0384	0	0	29.2408	17.6755	9.803
Monomethylmaleate-	A	Test Set	0.63	2.73	0	3.18	0.8974	0	1.897		0	55.76	29.207	-4.869	1.291	0	0	1.4837	1	1.766	2.601	4.614	8.293	15.707	0	0.0051	0	0	31.832	21.3443	13.599
N3-	A	Test Set	0.16	3.04	0	1.82	0.283	0	1.718		0	64.07	10.331	-1.259	0.42	0	0	0.501	1	1.599	2.694	4.658	8.176	14.488	0	0	0	0	36.225	25.7644	16.272
Naphthoic acid-	A	Test Set	1.61	4.13	0.05	2.87	1.4416	0	1.61		2	40.13	48.965	-6.882	1.712	0	0	1.9996	1	1.896	3.206	6.741	14.372	31.938	0	0	0	0	29.0223	21.5524	0
Naproxen-	A	Test Set	1.66	5.07	0	3.11	1.7606	0	2.404		2	49.36	64.85	-9.058	2.293	0	0	2.7836	1	2.28	3.72	7.91	16.67	36.735	0	0.0047	0	0	43.1674	33.8711	25.326
Ph4B-	A	Test Set	1.95	2.72	0.18	1.15	2.7	0	-0.19		4	0	104.095	-13.547	3.192	0	0	4.222	1	1.177	0.763	0.744	0.607	0.57	0	0	0	0	1.551	0.029	0
Phentolamine-	A	Test Set	2.3	5.4	0.1	4.13	2.2137	0	2.863		3	48.99	82.364	-11.129	2.783	0	1	3.4331	1	2.559	3.136	7.994	14.808	37.305	-0.048	4.8993	3.1873	1.7602	36.0288	27.6646	21.259
Phthalicacid-	A	Test Set	1.25	1.58	0.63	2.03	1.1255	0	3.124		1	80.26	36.476	-5.541	1.651	1	0	1.8152	1	2.403	3.195	7.769	12.665	31.004	-0.0533	5.3318	3.7496	2.4007	44.2141	32.6187	22.694
Picrate-	A	Test Set	1.58	7.75	0	1.76	1.2762	0	2.63		1	166.05	47.668	-5.131	2.281	0	0	2.1305	1	1.459	1.368	1.843	2.164	2.992	-0.001	0.149	0.004	0	13.532	5.797	1.793
Piroxicam-	A	Test Set	2.71	6.85	0.05	4.18	2.2285	0	2.857		3	104.82	79.727	-10.566	3.303	0	1	3.5398	1	2.056	2.398	4.323	7.173	13.262	0	0.0422	0	0	31.096	19.4231	11.307
PX-	A	Test Set	0.96	2.8	0	2.12	0.7536	0	1.676		1	17.07	27.037	-4.597	0.931	0	0	1.1888	1	1.744	3.219	6.81	15.179	34.968	0	0	0	0	32.4601	24.7146	19.429
Salyicylic acid-	A	Test Set	1.05	3.54	0.09	2.21	0.9689	0	1.982		1	60.36	33.482	-5.036	1.371	0	0	1.5159	1	1.61	2.44	4.385	8.027	15.291	0	0	0	0	30.5539	21.7329	14.02
SCN	A	Test Set	0.4	3.38	0	1.23	0.365	0	1.718		0	62.59	14.599	-3.4	0.581	0	0	0.6939	1	1.285	1.774	2.585	3.926	6.162	0	0	0	0	22.3254	12.2801	5.634
Terephthalicacid-	A	Test Set	1.25	3.9	0.41	2.92	1.1255	0	2.323		1	80.26	36.476	-5.672	1.651	1	0	1.8047	1	2.287	3.06	7.604	12.504	31.43	-0.0552	5.521	3.9011	2.5026	41.7447	31.1373	21.949
Thymol-	A	Test Set	0.97	2.52	0	2.29	1.3172	0	1.516		1	17.07	46.265	-7.249	1.492	0	0	2.0535	1	1.665	3.025	6.419	14.447	33.697	0	0	0	0	30.6004	22.9528	17.649
Valproic acid-	A	Test Set	0.29	2.37	0	3.13	1.2887	0	2.19		0	40.13	40.4	-6.579	1.432	0	0	2.0132	1	2.022	4.19	9.294	21.147	49.217	0	0	0	0	46.2355	37.6597	29.334
2,4-DimethylPy+	C	Test Set	0.48	2.05	1.2	0	0.9786	1.21	0		1	15.79	35.132	-5.888	1.082	0	1	1.5012	-1	0.975	-1.214	1.845	-3.157	5.794	-0.096	9.922	6.681	4.64	0	0	0
2-AcetylPy+	C	Test Set	0.58	5.78	3.89	0	0.9943	0.35	0		1	32.86	35.394	-5.658	1.221	0	1	1.5341	-1	1.279	-1.292	2.1	-2.985	5.529	-0.096	10.108	5.477	3.243	0.722	0.184	0.017
2-AminoPy+	C	Test Set	0.83	4.1	2.6	0	0.7966	0.512	0		1	41.81	29.604	-4.708	0.951	0	3	1.2224	-1	1.32	-2.002	3.361	-5.975	11.022	-0.206	20.937	14.76	9.825	0	0	0
2-BromoPy+	C	Test Set	0.77	5.33	3.5	0	0.8718	0.3	0		1	15.79	32.9	-6.139	1.59	0	1	1.3557	-1	1.149	-1.631	2.715	-5.03	-5.03	-0.128	13.198	8.632	6.095	0	0	0
2-ChloroPy+	C	Test Set	0.59	4.1	2.7	0	0.8192	0.5	0		1	15.79	30.21	-5.653	1.146	0	1	1.2964	-1	1.155	-1.656	2.777	-5.174	10.31	-0.132	13.507	8.861	6.273	0	0	0
2-Nitroaniline+	C	Test Set	1.03	2.4	2.55	0	1.0119	0.69	0		1	52.9	39.051	-5.225	1.391	0	3	1.576	-1	2.04	-3.456	7.479	-15.74	34.848	-0.263	26.6952	21.3272	16.7172	0.3547	0.0317	0
3,5-DimethylPy+	C	Test Set	0.51	2.25	1.42	0	0.9786	1.1	0		1	15.79	35.132	-5.883	1.082	0	1	1.5034	-1	1.018	-1.386	2.255	-4.058	7.724	-0.119	12.074	8.25	5.763	0	0	0
3-Bromoaniline+	C	Test Set	0.98	1.75	2.3	0	1.0127	0.579	0		1	3.24	39.509	-6.752	1.73	0	3	1.5714	-1	1.93	-3.657	7.634	-16.331	35.544	-0.2949	29.7829	23.6844	18.4328	0	0	0
3-Chloroaniline+	C	Test Set	0.9	1.71	2.19	0	0.9605	0.575	0		1	3.24	36.819	-6.274	1.286	0	3	1.5081	-1	1.912	-3.633	7.561	-16.136	35.023	-0.2942	29.703	23.578	18.2994	0	0	0
3-CyanoPy+	C	Test Set	0.6	7.16	1.25	0	0.8515	0.101	0		1	39.58	29.915	-4.939	1.051	0	1	1.3278	-1	1.678	-2.192	4.162	-7.423	15.251	-0.194	19.491	13.177	8.563	0.821	0.144	0.002
3-Methylaniline+	C	Test Set	0.8	1.92	2.05	0	0.9786	0.75	0		1	3.24	36.775	-5.814	1.082	0	3	1.4973	-1	1.758	-3.271	6.689	-14.03	29.857	-0.2716	27.3231	21.8931	16.9169	0	0	0
3-Nitroaniline+	C	Test Set	1.05	1.94	3.06	0	1.0119	0.076	0		1	52.9	39.051	-5.271	1.391	0	3	1.5893	-1	2.27	-3.833	8.512	-17.928	39.955	-0.3113	31.4667	24.9459	19.4409	0.603	0.0857	0
4-BromoPy+	C	Test Set	0.75	2.65	1.62	0	0.8718	0.78	0		1	15.79	32.9	-6.107	1.59	0	1	1.3562	-1	1.259	-1.834	3.054	-5.527	10.594	-0.161	16.192	10.39	6.757	0	0	0
4-ChloroPy+	C	Test Set	0.59	1.95	1.26	0	0.8192	0.95	0		1	15.79	30.21	-5.621	1.146	0	1	1.2905	-1	1.256	-1.838	3.062	-5.54	10.606	-0.162	16.297	10.437	6.761	0	0	0
4-CyanoPy+	C	Test Set	0.6	6.47	4.65	0	0.8515	0.25	0		1	39.58	29.915	-4.938	1.051	0	1	1.3279	-1	1.627	-2.112	3.906	-6.867	13.816	-0.191	19.117	12.478	7.842	0.648	0.099	0.001
4-DimethylaminoPy+	C	Test Set	0.83	6.71	3.75	0	1.0784	0.191	0		1	19.03	39.407	-6.247	1.232	0	1	1.6474	-1	0.979	-1.2	1.736	1.736	4.831	-0.097	10.138	6.397	4.251	0	0	0
4-Methylaniline+	C	Test Set	0.77	1.99	1.98	0	0.9786	0.668	0		1	3.24	36.775	-5.808	1.082	0	3	1.4945	-1	1.754	-3.25	6.614	-13.816	29.286	-0.2706	27.2289	21.7685	16.7729	0	0	0
4-Nitroaniline+	C	Test Set	1.07	2.22	3.34	0	1.0119	0.148	0		1	52.9	39.051	-5.26	1.391	0	3	1.5873	-1	2.289	-3.859	8.609	-18.16	40.632	-0.312	31.6219	24.9578	19.5311	0.6868	0.0997	0
Amiodaron+	C	Test Set	3.18	4.95	2.78	0	3.7751	3.35	0		3	51.47	145.295	-19.638	6.463	0	1	5.9132	-1	1.483	-0.636	1.207	-0.446	1.343	-0.0263	3.6894	0.5435	0.0136	2.734	0.9839	0.165
Amlodipine+	C	Test Set	1.45	6.48	2.91	0	3.0454	2.718	0		2	101.5	103.854	-15.042	4.099	0	4	4.7979	-1	2.914	-2.814	7.848	-12.176	29.803	-0.2824	28.713	22.3212	16.8418	9.2974	4.7826	1.565
Ammonia+	C	Test Set	-0.01	1.77	1.8	0	0.2299	0.37	0		0	0	5.985	-1.529	0.18	0	4	0.3243	-1	1.96	-3.858	7.623	-15.109	30.034	-0.3319	33.1892	26.5116	19.834	0	0	0
Atenolol+	C	Test Set	1.3	6.27	2.91	0	2.1978	2.48	0		1	89.16	74.871	-11.089	2.674	0	4	3.4505	-1	2.442	-1.496	4.848	-4.36	14.129	-0.2087	21.5352	13.9253	8.4811	10.238	6.1843	2.964
Atomoxetine+	C	Test Set	1.34	3.8	2.29	0	2.2087	1.785	0		2	25.84	80.867	-11.588	2.564	0	2	3.4547	-1	1.778	-2.229	4.339	-8.398	17.677	-0.187	19.2441	14.5844	10.955	0.1633	0.011	0
Benzimidazole+	C	Test Set	1.12	3	2.23	0	0.9268	1.37	0		2	31.58	37.056	-5.577	1.191	0	2	1.453	-1	1.401	-2.149	3.747	-6.907	13.198	-0.2004	20.2627	15.2041	10.5212	0	0	0
Chloropromazine+	C	Test Set	2.01	3.65	1.84	0	2.4271	2.494	0		3	32.98	90.007	-13.093	3.199	0	1	3.8409	-1	1.582	-1.648	2.67	-4.582	8.861	-0.1113	12.2403	8.0566	5.9269	0	0	0
Diethylamine+	C	Test Set	0	2.3	0.98	0	0.7935	0.93	0		0	16.61	25.401	-4.964	0.742	0	2	1.2084	-1	1.186	-1.795	3.136	-5.896	11.509	-0.1546	15.7073	11.9714	8.6579	0	0	0
Diphenylamine+	C	Test Set	1.32	1.76	2.04	0	1.4455	0.987	0		2	26.02	56.948	-8.297	1.702	0	2	2.2449	-1	1.493	-2.445	4.888	-10.52	23.524	-0.1889	19.2938	15.1473	11.8123	0	0	0
Donepezil+	C	Test Set	1.97	5.59	3.16	0	3.0522	2.466	0		4	39.97	109.939	-15.115	3.805	0	1	4.7664	-1	1.923	-0.645	2.804	-1.965	8.29	-0.076	8.3513	5.0257	3.5485	8.7078	4.1683	1.264
Dopamine+	C	Test Set	1.06	3.76	2.32	0	1.2369	1.525	0		1	68.1	44.226	-6.606	1.542	2	3	1.9361	-1	2.35	-3.37	7.051	-12.841	26.266	-0.3384	34.094	25.9351	18.5823	1.8868	0.6179	0.089
Esmolol+	C	Test Set	0.92	5.66	2.49	0	2.4385	2.19	0		1	72.37	82.862	-12.691	2.964	1	2	3.844	-1	2.086	-1.389	3.665	-4.509	10.985	-0.148	15.4337	10.4248	6.9785	5.4004	2.0779	0.42
Ethyl isonicotinate+	C	Test Set	0.61	2.55	1.6	0	1.1939	1.22	0		1	42.09	41.286	-6.554	1.522	0	1	1.8822	-1	1.724	-1.779	3.645	-5.649	11.838	-0.1713	17.2724	11.0478	7.0458	2.2024	0.5079	0.043
Hexylamine+	C	Test Set	0.05	2.1	1.38	0	1.0753	0.663	0		0	27.64	34.921	-6.339	1.022	0	3	1.6438	-1	1.557	-2.737	5.221	-10.194	20.159	-0.2451	24.5792	19.252	14.1825	0	0	0
Maprotiline+	C	Test Set	1.75	3.68	2.05	0	2.3555	2.199	0		2	137.43	78.104	-9.776	3.403	1	0	3.593	-1	2.48	-2.022	5.525	-9.749	25.477	-0.1837	18.8976	13.033	9.5101	4.2872	0.7638	0.013
Methylamine+	C	Test Set	0.1	2.9	1.35	0	0.3708	0.722	0		0	27.64	10.886	-2.6	0.321	0	3	0.5506	-1	1.649	-3.013	5.777	-11.346	22.564	-0.2578	25.9282	20.4262	15.2758	0	0	0
Metoclopramide+	C	Test Set	1.35	5.01	2.92	0	2.3613	1.888	0		1	46.01	84.496	-12.474	3.008	0	4	3.6978	-1	2.597	-2.882	9.174	-13.026	42.58	-0.2996	30.0823	23.4467	17.7109	9.7016	6.0586	3.419
Minoxidil+	C	Test Set	1.65	4.96	2.75	0	1.6097	2.209	0		2	93.33	56.105	-7.878	2.103	1	4	2.4894	-1	1.464	-1.913	3.352	-5.675	10.52	-0.229	23.0629	15.5835	9.3373	0.234	0.0333	0
Morphine+	C	Test Set	1.97	5.95	1.25	0	2.0863	3.94	0		5	54.13	76.904	-9.85	2.864	1	1	3.39	-1	2.02	-1.64	3.69	-4.56	10.09	-0.1894	19.7573	12.8045	8.172	4.4774	1.7098	0.4368
NEt4+	C	Test Set	-0.1	1.85	0.51	0	1.3571	1.475	0		0	0	42.944	-6.978	1.303	0	0	2.0367	-1	0.7	-0.537	0.437	-0.372	0.326	-0.001	0.9442	0.0028	0	0	0	0
n-Methylaniline+	C	Test Set	0.8	1.87	1.53	0	0.9786	0.892	0		1	26.02	36.71	-5.964	1.082	0	2	1.5189	-1	1.446	-2.357	4.506	-9.216	19.559	-0.1865	19.1831	14.7268	11.3233	0	0	0
Oxprenolol+	C	Test Set	1.16	5.09	2.35	0	2.2389	2.203	0		1	55.3	77.822	-11.803	2.664	1	2	3.5234	-1	1.667	-1.317	2.746	-3.817	8.33	-0.114	11.9414	8.2612	5.6965	2.4295	0.9209	0.205
Ph4As+	C	Test Set	2.22	3.2	0.07	0.91	2.811	0.581	0		4	0	104.095	-14.275	3.833	0	0	4.3679	-1	0.93	-0.635	0.519	-0.418	0.351	-0.002	0.694	0.012	0	0	0	0
PhNH3+	C	Test Set	0.81	1.62	1.93	0	0.8377	0.62	0		1	3.24	31.809	-5.134	0.941	0	3	1.2814	-1	1.793	-3.353	6.847	-14.359	30.562	-0.2772	27.8935	22.3612	17.3267	0	0	0
Pindolol+	C	Test Set	1.55	4.6	2.36	0	2.0305	2.266	0		2	61.86	74.047	-10.625	2.493	1	3	3.224	-1	1.918	-1.848	3.637	-5.586	11.37	-0.1864	19.2292	12.8821	8.2244	1.6295	0.7145	0.189
Prilocaine+	C	Test Set	0.87	4.28	2.35	0	1.9395	1.607	0		1	45.71	69.008	-10.307	2.213	0	3	2.9798	-1	1.612	-1.855	3.711	-6.707	14.304	-0.1732	17.6322	12.896	9.2438	1.0581	0.2128	0
Propranolol+	C	Test Set	1.69	4.31	2.07	0	2.1695	2.43	0		2	46.07	79.696	-11.599	2.604	1	2	3.4033	-1	1.73	-1.791	3.326	-5.481	10.931	-0.1675	17.181	12.0422	8.0454	0.9495	0.3774	0.097
Pseudoephedrine+	C	Test Set	0.77	3.74	1.38	0	1.46	1.941	0		1	36.84	51.05	-7.876	1.662	1	2	2.2772	-1	1.486	-1.791	3.154	-5.333	10.246	-0.1599	16.5428	11.5287	7.7549	0.6061	0.2028	0.034
PyO-2Me+	C	Test Set	0.53	2.82	1.61	0	0.8964	0.915	0		1	25.16	31.348	-5.34	1.101	0	0	1.4068	-1	1.165	-1.531	2.553	-4.663	9.344	-0.1223	12.8901	8.5337	5.9648	0.0131	0	0
PyO-4dimethylamino+	C	Test Set	0.75	3.42	1.62	0	1.1371	0.426	0		1	28.4	40.589	-6.414	1.392	0	0	1.7677	-1	1.118	-1.308	2.114	-3.555	6.769	-0.1145	11.8499	7.504	5.0562	0.0778	0.0016	0
PyO-4Methoxy+	C	Test Set	0.57	2.78	1.36	0	0.9551	0.349	0		1	34.39	32.874	-5.534	1.261	0	0	1.5118	-1	1.299	-1.617	2.731	-4.785	9.4	-0.146	14.9215	9.4195	6.0916	0.0265	0	0
PyO-4NO2+	C	Test Set	0.78	2.7	2.05	0	0.9297	0.978	0		1	74.82	33.623	-4.759	1.411	0	0	1.4943	-1	1.802	-2.542	4.846	-9.417	20.247	-0.205	20.5364	14.8223	10.0289	0.1291	0.002	0
PyO-4Ph+	C	Test Set	1.34	2.85	1.7	0	1.3633	1.22	0		2	25.16	51.818	-7.672	1.722	0	0	2.1223	-1	1.331	-1.676	2.794	-4.986	9.807	-0.1482	15.1262	9.5848	6.2523	0	0	0
PyOH+	C	Test Set	0.51	2.62	1.51	0	0.7555	0.894	0		1	25.16	26.382	-4.657	0.961	1	0	1.192	-1	1.276	-1.734	2.902	-5.218	10.27	-0.1501	15.5134	9.7958	6.4688	0	0	0
Pyridinium+	C	Test Set	0.48	2.25	1.21	0	0.6968	1.045	0		1	15.79	25.2	-4.471	0.801	0	1	1.0667	-1	1.168	-1.656	2.687	-4.783	9.057	-0.134	14.013	9.003	6.167	0	0	0
pyrrolidine+	C	Test Set	0.26	1.93	1.87	0	0.6849	0.372	0		1	16.61	20.578	-4.34	0.721	0	2	1.062	-1	1.245	-1.944	3.433	-6.438	12.435	-0.1774	17.9301	13.5624	9.8215	0	0	0
Quinidine+	C	Test Set	2.32	5.81	1.23	0	2.5727	4.153	0		3	54.38	100.698	-12.416	3.254	1	1	4.0619	-1	1.596	-0.665	1.941	-0.566	4.062	-0.0596	6.9456	3.4311	1.8626	4.9218	2.8352	1.539
Rizatriptan+	C	Test Set	1.98	5.32	3.82	0	2.1588	1.893	0		3	50.94	81.168	-11.133	2.704	0	2	3.4991	-1	2.13	-1.343	3.878	-3.41	11.415	-0.1471	15.9421	10.0853	6.6778	7.1773	4.456	2.432
Ropivacaine+	C	Test Set	1.17	4.67	2.92	0	2.3945	1.592	0		2	47.53	84.629	-11.561	2.754	0	1	3.6914	-1	1.411	-1.732	3.951	-7.828	19.653	-0.1416	14.411	10.8192	8.1886	1.6745	1.1201	0.638
Sumatriptan+	C	Test Set	1.72	6.09	2.99	0	2.2948	2.621	0		2	85.01	81.406	-11.411	2.964	0	3	3.6388	-1	2.365	-2.391	6.37	-10.853	26.105	-0.2404	24.6472	18.5617	14.0516	6.2109	1.8722	0.199
Terbinafine+	C	Test Set	1.74	3.61	1.66	0	2.6276	2.398	0		2	12.03	93.464	-12.837	2.784	0	1	3.9511	-1	1.077	-0.846	0.888	-0.913	1.02	-0.0396	4.8007	1.0261	0.0974	0	0	0
Thioridazine+	C	Test Set	2.55	4.52	3.33	0	2.9232	2.296	0		4	58.28	106.316	-15.342	3.716	0	1	4.5497	-1	1.65	-1.401	2.474	-4.125	8.448	-0.0925	10.1047	7.052	5.2721	0.124	0.0021	0
Triethylamine+	C	Test Set	-0.05	2.2	0.6	0	1.0753	1.25	0		0	4.44	35.11	-6.146	1.022	0	1	1.6518	-1	0.869	-0.958	1.314	-2.132	3.847	-0.0539	6.0094	3.9842	2.8464	0	0	0
Trimethylamine+	C	Test Set	-0.01	2.19	0.55	0	0.6526	1.064	0		0	4.44	20.689	-4.262	0.601	0	1	1	-1	1.094	-1.47	2.36	-4.26	8.28	-0.1057	11.47	8.05	5.99	0	0	0
Venlafaxine+	C	Test Set	1.16	4.75	1.74	0	2.3964	2.432	0		2	33.9	84.403	-11.351	2.784	0	1	3.7259	-1	1.525	-1.3	2.776	-4.022	8.996	-0.1165	12.4113	8.444	5.9804	2.5725	0.987	0.215
Isophthalicacid2-	DA	Test Set	1.4	3.36	0	5.22	1.104	0	3.216		1	80.26	36.476	-5.521	1.641	0	0	1.7861	2	3.675	7.18	15.05	32.441	71.726	0	0	0	0	82.5703	65.8653	49.668
Succinicacid2-	DA	Test Set	0.67	4.21	0	6.24	0.778	0	4.437		0	80.26	21.001	-3.795	1.161	0	0	1.2911	2	4.1	8.7	19	44	100	0	0	0	0	97	78	61
1 ,4-Dimethoxybenzene	N	Test Set	0.81	1	0	0.5	1.116	0	0		1	18.46	39.426	-6.514	1.382	0	0	1.7535	0	0.592	0.181	0.448	0.349	0.543	0	0.0069	0	0	2.7463	0.9753	0.162
1 -Chloro-2-methylpropane	N	Test Set	0.19	0.37	0	0.12	0.795	0	0		0	0	26.138	-5.407	0.926	0	0	1.2586	0	0.249	0.033	0.099	0.026	0.05	0	0.0001	0	0	0	0	0
1 -Chloroheptane	N	Test Set	0.19	0.4	0	0.1	1.218	0	0		0	0	40.559	-7.809	1.347	0	0	1.9207	0	0.276	0.045	0.105	0.031	0.054	0	0	0	0	0	0	0
1,1,1,-T richloroethane	N	Test Set	0.37	0.41	0	0.09	0.757	0	0		0	0	26.154	-6.238	1.334	0	0	1.2777	0	0.222	-0.065	0.083	-0.05	0.046	0	0.0435	0	0	0	0	0
1,1-Dichloroethane	N	Test Set	0.32	0.49	0.1	0.1	0.635	0	0		0	0	21.32	-5.25	0.99	0	0	1.0471	0	0.309	-0.081	0.17	-0.107	0.139	-0.0051	0.6325	0.0735	0	0	0	0
1,2,3-TrichIorobenzene	N	Test Set	1.03	0.86	0	0	1.084	0	0		1	0	41.472	-7.871	1.815	0	0	1.7591	0	0.275	-0.095	0.124	-0.084	0.081	-0.0001	0.1717	0	0	0	0	0
1,2,4-TrimethyIbenzene	N	Test Set	0.68	0.56	0	0.19	1.139	0	0		1	0	41.34	-6.739	1.202	0	0	1.753	0	0.282	0.041	0.092	0.032	0.04	0	0	0	0	0	0	0
1,2-Benzisoxazole	N	Test Set	0.88	1	0	0.33	0.864	0	0		2	26.03	34.009	-5.102	1.191	0	0	1.4044	0	0.525	0.078	0.488	0.256	0.685	-0.0036	0.5435	0.0494	0	2.411	1.1472	0.396
1,2-Dibromobenzene	N	Test Set	1.19	0.96	0	0.04	1.066	0	0		1	0	41.842	-7.756	2.359	0	0	1.6667	0	0.314	-0.093	0.129	-0.073	0.072	0	0.0766	0	0	0	0	0
1,2-Propylene oxide	N	Test Set	0.24	0.57	0	0.45	0.481	0	0		1	12.53	15.506	-3.484	0.581	0	0	0.8338	0	0.377	0.275	0.491	0.615	0.922	0	0	0	0	4.1533	2.0265	0.72
1,3,5-TrichIorobenzene	N	Test Set	0.98	0.73	0	0	1.084	0	0		1	0	41.472	-8.183	1.815	0	0	1.7814	0	0.289	-0.135	0.175	-0.149	0.156	-0.0045	0.7253	0.0436	0	0	0	0
1,3-DichIoropropane	N	Test Set	0.41	0.74	0	0.17	0.776	0	0		0	0	26.127	-6.121	1.13	0	0	1.2751	0	0.45	-0.026	0.212	-0.028	0.113	0	0.0279	0	0	0	0	0
1,3-Dichlorobenzene	N	Test Set	0.85	0.73	0	0.02	0.961	0	0		1	0	36.462	-7.033	1.47	0	0	1.5539	0	0.3	-0.112	0.144	-0.099	0.097	-0.0004	0.2212	0.0025	0	0	0	0
1,3-Dimethylnaphthalene	N	Test Set	1.39	0.92	0	0.2	1.367	0	0		2	0	53.88	-7.849	1.562	0	0	2.1047	0	0.37	-0.001	0.11	-0.001	0.038	0	0	0	0	0	0	0
1,4-Dibromobenzene	N	Test Set	1.15	0.86	0	0.04	1.066	0	0		1	0	41.842	-7.977	2.359	0	0	1.6785	0	0.338	-0.12	0.163	-0.107	0.107	0	0.2273	0	0	0	0	0
1,5-Dimethylnaphthalene	N	Test Set	1.37	0.87	0	0.2	1.367	0	0		2	0	53.88	-7.748	1.562	0	0	2.0977	0	0.373	0.002	0.112	0.002	0.04	0	0	0	0	0	0	0
1,8-DimethyInaphthalene	N	Test Set	1.4	0.91	0	0.2	1.367	0	0		2	0	53.88	-7.688	1.562	0	0	2.0852	0	0.373	-0.002	0.113	-0.002	0.04	0	0	0	0	0	0	0
1-Bromobutane	N	Test Set	0.36	0.4	0	0.12	0.847	0	0		0	0	29.212	-6.116	1.37	0	0	1.3224	0	0.264	0.04	0.107	0.027	0.055	0	0.0007	0	0	0	0	0
1-Bromodecane	N	Test Set	0.33	0.4	0	0.12	1.693	0	0		0	0	58.054	-10.513	2.212	0	0	2.6455	0	0.309	0.047	0.111	0.03	0.056	0	0.0007	0	0	0	0	0
1-Bromoheptane	N	Test Set	0.34	0.4	0	0.12	1.27	0	0		0	0	43.633	-8.34	1.791	0	0	1.9845	0	0.286	0.044	0.109	0.029	0.055	0	0.0007	0	0	0	0	0
1-Bromopentane	N	Test Set	0.36	0.4	0	0.12	0.988	0	0		0	0	34.019	-6.861	1.511	0	0	1.5437	0	0.271	0.042	0.108	0.029	0.055	0	0.0007	0	0	0	0	0
1-Bromopropane	N	Test Set	0.37	0.4	0	0.12	0.706	0	0		0	0	24.405	-5.371	1.23	0	0	1.1005	0	0.258	0.036	0.108	0.026	0.055	0	0.0005	0	0	0	0	0
1-Chloro-4-nitrobenzene	N	Test Set	0.98	1.17	0	0.25	1.013	0	0		1	49.66	38.694	-6.019	1.576	0	0	1.6365	0	0.553	0.007	0.42	0.038	0.392	-0.0006	0.4963	0.0024	0	1.081	0.2128	0.006
1-Chloropentane	N	Test Set	0.21	0.4	0	0.1	0.936	0	0		0	0	30.945	-6.379	1.066	0	0	1.4824	0	0.261	0.043	0.104	0.031	0.053	0	0	0	0	0	0	0
1-Cyanopentane	N	Test Set	0.17	0.9	0	0.36	0.968	0	0		0	23.79	30.705	-5.578	0.972	0	0	1.5095	0	0.475	0.231	0.475	0.441	0.685	0	0.0557	0	0	3.3199	1.3132	0.309
1-Cyanopropane	N	Test Set	0.19	0.9	0	0.36	0.686	0	0		0	23.79	21.091	-4.178	0.691	0	0	1.0711	0	0.463	0.231	0.474	0.444	0.681	0	0.0478	0	0	3.3169	1.2961	0.297
1-Fluoropentane	N	Test Set	0	0.35	0	0.1	0.831	0	0		0	0	26.2	-5.217	0.901	0	0	1.3339	0	0.252	0.092	0.127	0.086	0.089	0	0	0	0	0.2153	0	0
1-Iodobutane	N	Test Set	0.63	0.4	0	0.15	0.93	0	0		0	0	34.305	-6.678	1.84	0	0	1.4234	0	0.261	0.027	0.096	0.014	0.045	0	0.0022	0	0	0	0	0
1-Iodohexane	N	Test Set	0.62	0.4	0	0.15	1.213	0	0		0	0	43.919	-8.164	2.121	0	0	1.8668	0	0.275	0.03	0.096	0.016	0.044	0	0.0018	0	0	0	0	0
1-Naphthol	N	Test Set	1.52	1.05	0.61	0.37	1.144	0	0		2	20.23	45.971	-6.562	1.442	1	0	1.7759	0	0.689	-0.318	0.941	-1.132	2.437	-0.0533	5.3796	3.7858	2.3803	0.8839	0.211	0.015
1-Nitrohexane	N	Test Set	0.2	0.95	0	0.29	1.129	0	0		0	49.66	37.481	-6.114	1.312	0	0	1.7917	0	0.503	0.12	0.361	0.154	0.344	-0.0006	0.2018	0.0093	0	1.2309	0.2091	0.005
1-Penthanthiol	N	Test Set	0.37	0.35	0	0.24	0.9766	0	0		0	38.8	34.078	-6.543	1.042	0	0	1.5407	0	0.323	0.103	0.236	0.157	0.261	-0.0001	0.0968	0.0005	0	1.2726	0.3196	0.024
2,2,2-Trifluoroethanol	N	Test Set	0.02	0.6	0.57	0.25	0.502	0	0		0	20.23	13.081	-3.115	1	1	0	0.9408	0	0.608	-0.257	1.012	-0.79	2.395	-0.0496	5.0676	3.4142	1.9938	2.5863	1.1163	0.265
2,2-Dimethylbutane	N	Test Set	0	0	0	0	0.954	0	0		0	0	30.696	-5.483	0.862	0	0	1.4585	0	0.088	0.004	0.009	0.001	0.001	0	0	0	0	0	0	0
2,2-Dimethylpropane	N	Test Set	0	0	0	0	0.813	0	0		0	0	25.889	-4.909	0.722	0	0	1.2561	0	0.083	0.004	0.009	0.001	0.001	0	0	0	0	0	0	0
2,2-Dimethylpropan-l-ol	N	Test Set	0.22	0.36	0.37	0.53	0.872	0	0		0	20.23	27.051	-4.948	0.882	1	0	1.3553	0	0.472	0.107	0.862	0.308	2.057	-0.0303	3.0445	1.7329	0.7652	4.5758	2.8904	1.432
2,3,4-Trimethylpentane	N	Test Set	0	0	0	0	1.236	0	0		0	0	40.57	-6.65	1.142	0	0	1.8693	0	0.098	0.004	0.01	0.001	0.001	0	0	0	0	0	0	0
2,3,6-Trimethylphenol	N	Test Set	0.87	0.81	0.37	0.47	1.198	0	0		1	20.23	43.363	-6.664	1.362	1	0	1.8416	0	0.55	-0.031	0.608	-0.279	1.192	-0.0269	2.7244	1.7431	0.9232	1.6446	0.5439	0.074
2,3-Dimethylbuta-1,3-diene	N	Test Set	0.35	0.23	0	0.14	0.868	0	0		0	0	30.008	-5.366	0.821	0	0	1.3309	0	0.236	0.03	0.08	0.027	0.038	0	0	0	0	0.0097	0	0
2,3-Dimethylpentane	N	Test Set	0	0	0	0	1.095	0	0		0	0	35.763	-6.214	1.002	0	0	1.6656	0	-0.001	0.002	0.009	0	0.001	0	0	0	0	0	0	0
2,3-Dimethylphenol	N	Test Set	0.85	0.81	0.53	0.36	1.057	0	0		1	20.23	38.397	-5.972	1.222	1	0	1.6238	0	0.576	-0.043	0.667	-0.312	1.364	-0.0286	2.8968	2.8968	1.0462	1.8497	0.7192	0.128
2,3-Dimethylpyridine	N	Test Set	0.66	0.77	0	0.62	0.957	0	0		1	12.89	34.169	-5.643	1.072	0	0	1.4828	0	0.462	0.35	0.792	1.302	2.516	0	0	0	0	5.2484	3.6019	2.277
2,4,5-Trimethylphenol	N	Test Set	0.85	0.79	0.52	0.44	1.198	0	0		1	20.23	43.363	-6.701	1.362	1	0	1.8541	0	0.57	-0.027	0.67	-0.283	1.392	-0.0289	2.9153	1.8988	1.0377	2.0256	0.8126	0.165
2,5-Dimethylphenol	N	Test Set	0.84	0.79	0.54	0.37	1.057	0	0		1	20.23	38.397	-6.073	1.222	1	0	1.6339	0	0.569	-0.051	0.673	-0.345	1.416	-0.0299	3.0099	1.9828	1.1081	1.8366	0.7098	0.125
2,5-Dimethylpyridine	N	Test Set	0.63	0.74	0	0.62	0.957	0	0		1	12.89	34.169	-5.741	1.072	0	0	1.4855	0	0.455	0.344	0.768	1.249	2.387	0	0.0002	0	0	5.1165	3.4714	2.194
2,6-Difluoropyridine	N	Test Set	0.38	0.94	0	0.24	0.711	0	0		1	12.89	24.153	-4.374	1.151	0	0	1.215	0	0.402	0.012	0.33	0.106	0.412	-0.0008	0.3562	0.0032	0	1.4655	0.6425	0.183
2,6-Dimethylaniline	N	Test Set	0.97	0.89	0.2	0.46	1.098	0	0		1	26.02	40.778	-6.174	1.212	0	2	1.6732	0	0.557	-0.06	0.473	-0.225	0.625	-0.0237	2.4659	1.0721	0.2867	0.3752	0.0218	0
2,6-Dimethylanisole	N	Test Set	0.67	0.78	0	0.34	1.198	0	0		1	9.23	42.866	-6.88	1.362	0	0	1.8444	0	0.41	0.082	0.199	0.102	0.145	0	0	0	0	0.5148	0.0862	0.002
2,6-Dimethylnaphthalene	N	Test Set	1.33	0.91	0	0.2	1.367	0	0		2	0	53.88	-7.94	1.562	0	0	2.1086	0	0.369	-0.001	0.109	-0.001	0.038	0	0	0	0	0	0	0
2-Bromophenol	N	Test Set	1.04	0.9	0.35	0.31	0.95	0	0		1	20.23	36.165	-6.251	1.73	1	0	1.4786	0	0.475	-0.129	0.514	-0.367	1.002	-0.0246	2.4919	1.5995	0.8593	1.0583	0.2778	0.016
2-Chloro-2-methylpropane	N	Test Set	0.14	0.25	0	0.12	0.795	0	0		0	0	26.176	-5.358	0.926	0	0	1.2647	0	0.276	0.074	0.125	0.067	0.072	0	0	0	0	0	0	0
2-Chloroethanol	N	Test Set	0.42	0.59	0.47	0.57	0.572	0	0		0	20.23	17.686	-4.232	0.805	1	0	0.9281	0	0.645	0.004	1.01	-0.06	2.259	-0.0395	3.976	2.49	1.2677	4.111	2.3288	1.038
2-Chloropropane	N	Test Set	0.18	0.35	0	0.12	0.654	0	0		0	0	21.331	-4.818	0.785	0	0	1.043	0	0.266	0.054	0.118	0.047	0.064	0	0	0	0	0	0	0
2-Cyanobutane	N	Test Set	0.16	0.87	0	0.36	0.827	0	0		0	23.79	25.898	-4.76	0.831	0	0	1.2882	0	0.439	0.248	0.438	0.454	0.64	0	0.0041	0	0	3.2185	1.2606	0.287
2-Cyanopyridine	N	Test Set	0.73	1.44	0	0.51	0.829	0	0		1	36.68	28.952	-4.807	1.041	0	0	1.3148	0	0.618	0.209	0.69	0.547	1.114	-0.0009	0.34	0.0064	0	4.0331	1.8663	0.721
2-Ethoxyethanol	N	Test Set	0.24	0.5	0.3	0.83	0.79	0	0		0	29.46	23.589	-4.763	0.901	1	0	1.2473	0	0.744	0.354	1.404	0.878	3.34	-0.0356	3.5759	2.1478	1.0247	8.7576	5.1466	2.407
2-Ethylbutanoic acid	N	Test Set	0.18	0.57	0.6	0.5	1.028	0	0		0	40.13	30.786	-5.41	1.162	1	0	1.6149	0	0.668	-0.01	1.178	-0.52	2.896	-0.051	5.1014	3.5261	2.1902	4.5265	1.8236	0.405
2-Ethylnaphthalene	N	Test Set	1.33	0.9	0	0.2	1.367	0	0		2	0	53.721	-7.922	1.562	0	0	2.1158	0	0.374	-0.012	0.112	-0.01	0.04	0	0	0	0	0	0	0
2-Ethylphenol	N	Test Set	0.83	0.84	0.52	0.37	1.057	0	0		1	20.23	38.238	-6.038	1.222	1	0	1.6373	0	0.564	-0.072	0.661	-0.384	1.391	-0.0305	3.0705	1.9802	1.123	1.657	0.6192	0.095
2-Ethylpyridine	N	Test Set	0.61	0.71	0	0.59	0.957	0	0		1	12.89	34.01	-5.669	1.072	0	0	1.4722	0	0.453	0.322	0.754	1.215	2.374	0	0.001	0	0	4.8985	3.3282	2.078
2-Ethyltoluene	N	Test Set	0.68	0.55	0	0.18	1.139	0	0		1	0	41.181	-6.658	1.202	0	0	1.7529	0	0.287	0.034	0.094	0.025	0.039	0	0	0	0	0	0	0
2-Fluorophenol	N	Test Set	0.66	0.69	0.61	0.26	0.793	0	0		1	20.23	28.423	-4.76	1.121	1	0	1.2861	0	0.545	-0.221	0.752	-0.758	1.812	-0.0406	4.0796	2.7936	1.6576	1.2045	0.3438	0.026
2-Fluoropyridine	N	Test Set	0.49	0.89	0	0.36	0.693	0	0		1	12.89	24.195	-4.322	0.971	0	0	1.1319	0	0.439	0.126	0.487	0.451	0.922	0	0.1151	0	0	2.9591	1.7022	0.837
2-Methoxyaniline	N	Test Set	0.99	1	0.23	0.5	1.016	0	0		1	35.25	37.338	-5.831	1.232	0	2	1.5744	0	0.702	0.063	0.701	0.19	1.133	-0.02	2.1095	0.7176	0.1166	2.4789	1.3312	0.637
2-Methoxyphenol	N	Test Set	0.84	0.91	0.22	0.52	0.975	0	0		1	29.46	34.957	-5.641	1.241	1	0	1.5265	0	0.607	-0.014	0.599	-0.143	1.019	-0.0219	2.22	1.3207	0.6602	1.8119	0.6883	0.118
2-Methoxypyridine	N	Test Set	0.64	0.76	0	0.47	0.875	0	0		1	22.12	30.729	-5.215	1.091	0	0	1.3764	0	0.647	0.414	0.983	1.351	2.476	0	0.0268	0	0	7.0319	4.2941	2.265
2-Methyl-2-nitropropane	N	Test Set	0.2	0.92	0	0.35	0.847	0	0		0	49.66	27.905	-4.407	1.031	0	0	1.3554	0	0.416	0.159	0.276	0.204	0.253	0	0	0	0	1.1128	0.1924	0.005
2-Methylacetanilide	N	Test Set	0.87	1.4	0.5	0.7	1.254	0	0		1	29.1	45.721	-6.974	1.492	0	1	1.9542	0	0.838	0.271	1.316	0.787	3.032	-0.0305	3.12	1.8418	0.8634	7.7059	4.7166	2.261
2-Methylbenzaldehyde	N	Test Set	0.87	0.96	0	0.4	1.014	0	0		1	17.07	36.796	-5.849	1.202	0	0	1.5798	0	0.526	0.237	0.529	0.536	0.824	0	0	0	0	4.1167	1.7319	0.448
2-Methylbenzoic acid	N	Test Set	0.73	0.9	0.6	0.34	1.073	0	0		1	40.13	36.425	-5.789	1.362	1	0	1.6679	0	0.821	0.041	1.235	-0.296	2.884	-0.0396	3.989	2.8369	1.8284	5.3001	2.1312	0.527
2-Methylbut-2-ene	N	Test Set	0.16	0.08	0	0.07	0.77	0	0		0	0	25.675	-4.935	0.701	0	0	1.1725	0	0.164	0.04	0.063	0.04	0.042	0	0	0	0	0.1353	0.0032	0
2-Methylbutan- 1-ol	N	Test Set	0.22	0.39	0.37	0.48	0.872	0	0		0	20.23	27.311	-5.082	0.882	1	0	1.3529	0	0.494	0.152	0.949	0.447	2.336	-0.0305	3.0681	1.7578	0.7864	5.2573	3.2702	1.635
2-Methylbutan-2-ol	N	Test Set	0.19	0.3	0.31	0.6	0.872	0	0		0	20.23	27.349	-4.98	0.882	1	0	1.3545	0	0.465	0.205	0.846	0.633	2.071	-0.021	2.1188	1.0946	0.4324	5.2164	3.3323	1.696
2-Methylfuran	N	Test Set	0.37	0.5	0	0.14	0.677	0	0		1	13.14	23.674	-4.514	0.821	0	0	1.093	0	0.338	0.02	0.184	0.029	0.13	-0.0001	0.0875	0.0002	0	0.2533	0.0229	0
2-Methylnaphthalene	N	Test Set	1.3	0.88	0	0.2	1.226	0	0		2	0	48.914	-7.244	1.422	0	0	1.8918	0	0.369	-0.017	0.114	-0.012	0.041	0	0	0	0	0	0	0
2-Methylpent-1-ene	N	Test Set	0.09	0.08	0	0.07	0.911	0	0		0	0	30.482	-5.671	0.842	0	0	1.4087	0	0.184	0.048	0.07	0.045	0.046	0	0	0	0	0.1307	0.0042	0
2-Methylpentan-2-ol	N	Test Set	0.17	0.3	0.31	0.6	1.013	0	0		0	20.23	32.156	-5.72	1.022	1	0	1.5748	0	0.475	0.214	0.862	0.676	2.147	-0.0207	2.1036	1.083	0.421	5.3009	3.4244	1.792
2-Methylpentan-3-ol	N	Test Set	0.21	0.33	0.33	0.56	1.013	0	0		0	20.23	32.118	-5.711	1.022	1	0	1.5659	0	0.446	0.198	0.766	0.565	1.816	-0.0185	1.8811	0.9831	0.3754	4.8034	2.972	1.439
2-Methylpentane	N	Test Set	0	0	0	0	0.954	0	0		0	0	30.956	-5.757	0.862	0	0	1.4637	0	0.082	0.004	0.008	0.001	0.001	0	0	0	0	0	0	0
2-Methylpentanoic acid	N	Test Set	0.18	0.57	0.6	0.49	1.028	0	0		0	40.13	30.786	-5.601	1.162	1	0	1.6191	0	0.678	-0.013	1.199	-0.559	2.964	-0.0521	5.2137	3.6186	2.2594	4.5542	1.793	0.371
2-Methylphenanthrene	N	Test Set	2.06	1.25	0	0.26	1.595	0	0		3	0	66.42	-8.975	1.923	0	0	2.4573	0	0.466	-0.054	0.152	-0.039	0.062	0	0.0225	0	0	0	0	0
2-Methylphenyl acetate	N	Test Set	0.68	1.04	0	0.57	1.214	0	0		1	26.3	42.907	-6.792	1.502	0	0	1.9266	0	0.624	0.222	0.528	0.447	0.697	0	0.0099	0	0	3.5288	1.3133	0.264
2-Methylpropan-1-ol	N	Test Set	0.22	0.39	0.37	0.48	0.731	0	0		0	20.23	22.504	-4.41	0.741	1	0	1.1389	0	0.492	0.161	0.97	0.492	2.422	-0.0305	3.0682	1.7575	0.7844	5.3805	3.394	1.736
2-Methylpropan-2-ol	N	Test Set	0.18	0.3	0.31	0.6	0.731	0	0		0	20.23	22.542	-4.329	0.741	1	0	1.1456	0	0.497	0.259	0.966	0.823	2.46	-0.0215	2.1759	1.1355	0.4578	6.045	3.9621	2.124
2-Methylpyrazine	N	Test Set	0.63	0.9	0	0.64	0.775	0	0		1	25.78	26.998	-4.582	0.941	0	0	1.2183	0	0.564	0.421	0.93	1.31	2.355	0	0.0191	0	0	6.6975	4.23	2.332
2-Methyltetrahydrofuran	N	Test Set	0.24	0.48	0	0.53	0.763	0	0		1	9.23	25.12	-4.748	0.861	0	0	1.2185	0	0.345	0.349	0.589	0.898	1.443	0	0	0	0	5.0683	3.1065	1.526
2-Naphthylamine	N	Test Set	1.67	1.28	0.22	0.55	1.185	0	0		2	26.02	48.352	-6.733	1.432	0	2	1.8243	0	0.725	-0.12	0.687	-0.179	1.075	-0.0313	3.2527	1.2964	0.3021	1.6295	0.891	0.396
2-Nitrophenol	N	Test Set	1.01	1.05	0.05	0.37	0.949	0	0		1	69.89	35.707	-4.821	1.391	1	0	1.4891	0	0.6	0.036	0.492	0.059	0.526	-0.0071	0.818	0.3011	0.0679	1.5471	0.2752	0.004
2-Nitropropane	N	Test Set	0.22	0.92	0	0.33	0.706	0	0		0	49.66	23.06	-3.827	0.891	0	0	1.1393	0	0.46	0.141	0.325	0.194	0.3	0	0.0104	0	0	1.2363	0.22	0.005
2-Phenylethanol	N	Test Set	0.81	0.91	0.3	0.64	1.057	0	0		1	20.23	37.377	-6.048	1.222	1	0	1.6544	0	0.63	0.244	0.834	0.704	1.812	-0.0143	1.4483	1.4483	0.2235	5.1879	3.1684	1.572
2-Propylpentanoic acid	N	Test Set	0.18	0.57	0.6	0.5	1.31	0	0		0	40.13	40.4	-6.946	1.442	1	0	2.0584	0	0.682	-0.004	1.197	-0.533	2.975	-0.0518	5.1828	3.5946	2.2429	4.5689	1.8744	0.439
2-Propylphenol	N	Test Set	0.82	0.86	0.52	0.37	1.198	0	0		1	20.23	43.045	-6.745	1.362	1	0	1.8383	0	0.571	-0.052	0.652	-0.345	1.35	-0.0293	2.9507	1.9441	1.0797	1.6919	0.6376	0.1
2-sec-Butylphenol	N	Test Set	0.82	0.91	0.52	0.41	1.339	0	0		1	20.23	47.852	-7.241	1.502	1	0	2.0631	0	0.56	-0.029	0.582	-0.226	1.077	-0.0256	2.5972	1.5428	0.7565	1.6266	0.6008	0.092
3,3-Dimethylpentane	N	Test Set	0	0	0	0	1.095	0	0		0	0	35.503	-6.072	1.002	0	0	1.6645	0	0.093	0.003	0.009	0.001	0.001	0	0	0	0	0	0	0
3,4-Dichlorophenol	N	Test Set	1.02	1.2	0.74	0	1.02	0	0		1	20.23	38.485	-6.915	1.63	1	0	1.6528	0	0.646	-0.441	1.116	-1.497	3.16	-0.0638	6.5312	4.5224	2.9514	1.0621	0.2808	0.017
3,4-Dimethylphenol	N	Test Set	0.83	0.86	0.56	0.39	1.057	0	0		1	20.23	38.397	-6.07	1.222	1	0	1.6407	0	0.634	-0.159	0.924	-0.728	2.225	-0.0477	4.8219	3.3008	1.9562	2.0741	0.8623	0.186
3,4-Dimethylpyridine	N	Test Set	0.68	0.85	0	0.62	0.957	0	0		1	12.89	34.169	-5.602	1.072	0	0	1.4827	0	0.48	0.38	0.837	1.374	2.623	0	0	0	0	5.6168	3.8232	2.396
3-Bromopyridine	N	Test Set	0.91	0.9	0	0.38	0.85	0	0		1	12.89	31.937	-5.924	1.58	0	0	1.3423	0	0.459	0.156	0.59	0.642	1.338	-0.0001	0.1586	0.0004	0	3.6219	2.2635	1.251
3-Bromotoluene	N	Test Set	0.9	0.75	0	0.09	1.032	0	0		1	0	39.108	-7.054	1.71	0	0	1.6101	0	0.301	-0.045	0.099	-0.033	0.042	0	0.0113	0	0	0	0	0
3-Chloroacetophenone	N	Test Set	0.92	1.07	0	0.4	1.137	0	0		1	17.07	41.647	-7.043	1.546	0	0	1.8039	0	0.571	0.16	0.556	0.425	0.803	-0.0003	0.1779	0.0027	0	3.7567	1.5136	0.377
3-Chloroaniline	N	Test Set	1.05	1.1	0.3	0.3	0.939	0	0		1	26.02	35.856	-6.098	1.276	0	2	1.4846	0	0.621	-0.302	0.621	-0.633	0.99	-0.0433	4.4199	2.0993	0.6589	0.0969	0.0029	0
3-Chlorobenzoic acid	N	Test Set	0.84	0.95	0.65	0.3	1.054	0	0		1	40.13	36.469	-6.349	1.566	1	0	1.6848	0	0.892	-0.245	1.62	-1.362	4.59	-0.0657	6.7052	4.8131	3.2878	4.3762	1.5868	0.336
3-Chlorophenol	N	Test Set	0.91	1.06	0.69	0.15	0.898	0	0		1	20.23	33.475	-5.913	1.286	1	0	1.4367	0	0.649	-0.377	1.056	-1.301	2.875	-0.0593	6.0214	4.1975	2.7031	1.2718	0.3877	0.036
3-Chloropyridine	N	Test Set	0.73	0.83	0	0.4	0.798	0	0		1	12.89	29.247	-5.447	1.136	0	0	1.2785	0	0.45	0.162	0.6	0.668	1.389	-0.0002	0.1686	0.0008	0	3.7129	2.3308	1.3
3-Chlorotoluene	N	Test Set	0.74	0.67	0	0.07	0.98	0	0		1	0	36.418	-6.578	1.266	0	0	1.5472	0	0.289	-0.045	0.096	-0.034	0.042	0	0.0149	0	0	0	0	0
3-Cyanophenol	N	Test Set	0.93	1.55	0.77	0.28	0.93	0	0		1	44.02	33.18	-5.221	1.191	1	0	1.4695	0	0.858	-0.24	1.425	-1.149	3.578	-0.0637	6.5317	4.4947	2.9266	3.5009	1.0922	0.148
3-Fluoronitrobenzene	N	Test Set	0.64	1.09	0	0.35	0.889	0	0		1	49.66	33.642	-4.908	1.411	0	0	1.4963	0	0.539	-0.002	0.392	0.016	0.353	-0.0021	0.5067	0.025	0	0.9029	0.1529	0.001
3-Iodophenol	N	Test Set	1.37	1.2	0.7	0.18	1.033	0	0		1	20.23	41.182	-7.018	2.2	1	0	1.6074	0	0.674	-0.382	1.057	-1.294	2.846	-0.0592	5.9997	4.1801	2.6774	1.2565	0.3794	0.034
3-Methylanisole	N	Test Set	0.71	0.78	0	0.3	1.057	0	0		1	9.23	37.9	-6.317	1.222	0	0	1.6434	0	0.436	0.104	0.261	0.176	0.27	0	0.0014	0	0	1.2826	0.4363	0.066
3-Methylbenzamide	N	Test Set	0.99	1.5	0.49	0.63	1.114	0	0		1	43.09	39.503	-6.108	1.352	0	2	1.7264	0	0.948	0.16	1.641	0.593	3.734	-0.0536	5.4219	3.012	1.2082	8.6516	5.3003	2.51
3-Methylbutanoic acid	N	Test Set	0.18	0.57	0.6	0.49	0.888	0	0		0	40.13	25.979	-4.878	1.021	1	0	1.4032	0	0.685	-0.033	1.212	-0.598	2.991	-0.0527	5.2721	3.6664	2.2941	4.5197	1.7114	0.345
3-Methylcholanthrene	N	Test Set	3.26	1.57	0	0.58	2.138	0	0		5	0	91.744	-11.447	2.684	0	0	3.3295	0	0.562	-0.038	0.176	-0.03	0.069	0	0.0266	0	0	0	0	0
3-Methylheptane	N	Test Set	0	0	0	0	1.236	0	0		0	0	35.763	-7.022	1.142	0	0	1.9028	0	0.094	0.004	0.009	0.001	0.001	0	0	0	0	0	0	0
3-Methylhexane	N	Test Set	0	0	0	0	1.095	0	0		0	0	35.763	-6.424	1.002	0	0	1.6725	0	0.09	0.003	0.009	0.001	0.001	0	0	0	0	0	0	0
3-Methylpyridine	N	Test Set	0.63	0.81	0	0.54	0.816	0	0		1	12.89	29.203	-4.993	0.931	0	0	1.2701	0	0.461	0.329	0.772	1.21	2.316	0	0.0012	0	0	5.1552	3.4713	2.137
3-Nitroaniline	N	Test Set	1.2	1.71	0.4	0.35	0.991	0	0		1	75.68	38.088	-5.101	1.381	0	2	1.5669	0	0.825	-0.208	0.936	-0.542	1.476	-0.05	5.1435	2.5599	0.8745	1.4506	0.3478	0.022
3-Nitrotoluene	N	Test Set	0.87	1.1	0	0.25	1.032	0	0		1	49.66	38.65	-5.574	1.371	0	0	1.6273	0	0.511	0.101	0.354	0.167	0.326	0	0.0413	0	0	1.2422	0.2762	0.013
3-Ntrobenzoic acid	N	Test Set	0.99	1.41	0.7	0.56	1.172	0	0		1	89.79	38.701	-5.36	1.671	1	0	1.769	0	1.133	-0.251	1.917	-1.708	5.467	-0.0701	7.2367	5.29	3.7317	4.3554	1.307	0.226
3-Phenylphenol	N	Test Set	1.56	1.41	0.59	0.45	1.383	0	0		2	20.23	53.901	-7.775	1.702	1	0	2.1404	0	0.801	-0.28	1.025	-1	2.494	-0.0526	5.3109	3.6888	2.2875	1.6341	0.6079	0.093
4-AcetylpyrMine	N	Test Set	0.77	1.13	0	0.84	0.973	0	0		1	29.96	34.432	-5.469	1.211	0	0	1.5298	0	0.715	0.425	1.002	1.216	2.18	-0.0001	0.0713	0.0002	0	7.1202	3.736	1.765
4-Aminoacetophenone	N	Test Set	1.19	1.45	0.32	0.65	1.114	0	0		1	43.09	41.041	-6.083	1.352	0	2	1.725	0	0.96	0.114	1.439	0.413	2.89	-0.0493	4.971	2.4575	0.7971	7.4983	4.0569	1.601
4-Aminobiphenyl	N	Test Set	1.57	1.48	0.26	0.48	1.424	0	0		2	26.02	56.282	-7.966	1.692	0	2	2.1802	0	0.794	-0.097	0.722	-0.098	1.132	-0.0291	3.0497	1.1675	0.2527	1.8812	1.8812	0.5
4-Bromophenol	N	Test Set	1.08	1.17	0.67	0.2	0.95	0	0		1	20.23	36.165	-6.382	1.73	1	0	1.4979	0	0.668	-0.355	1.031	-1.193	2.697	-0.0562	5.709	3.98	2.5267	1.3719	0.4459	0.049
4-Chloro-2-methyl phenol	N	Test Set	0.89	0.91	0.63	0.22	1.038	0	0		1	20.23	38.441	-6.535	1.426	1	0	1.6447	0	0.587	-0.181	0.708	-0.587	1.581	-0.0334	3.396	2.2886	1.352	1.3907	0.4568	0.049
4-Cyanopyridine	N	Test Set	0.75	1.21	0	0.59	0.829	0	0		1	36.68	28.952	-4.756	1.041	0	0	1.3133	0	0.663	0.267	0.839	0.781	1.618	-0.0014	0.517	0.0109	0	4.9609	2.5889	1.229
4-Ethylphenol	N	Test Set	0.8	0.9	0.55	0.36	1.057	0	0		1	20.23	38.238	-6.14	1.222	1	0	1.6528	0	0.635	-0.187	0.929	-0.795	2.261	-0.049	4.9481	3.3969	2.0266	1.9462	0.7777	0.149
4-Ethylphenyl acetate	N	Test Set	0.66	1	0	0.58	1.354	0	0		1	26.3	47.714	-7.631	1.642	0	0	2.1381	0	0.644	0.235	0.553	0.472	0.743	0	0.0169	0	0	3.7384	1.4112	0.29
4-Ethylpyridine	N	Test Set	0.63	0.8	0	0.57	0.957	0	0		1	12.89	34.01	-5.65	1.072	0	0	1.4814	0	0.475	0.362	0.812	1.312	2.508	0	0.0006	0	0	5.4558	3.6926	2.292
4-Fluorophenol	N	Test Set	0.67	0.97	0.63	0.23	0.793	0	0		1	20.23	28.423	-4.78	1.121	1	0	1.293	0	0.658	-0.308	1.007	-1.043	2.53	-0.0534	5.4379	3.746	2.3244	1.6314	0.6026	0.092
4-Formylpyridine	N	Test Set	0.8	1.12	0	0.7	0.832	0	0		1	29.96	29.625	-4.82	1.071	0	0	1.323	0	0.672	0.36	0.901	1.027	1.876	0	0.0785	0	0	6.106	3.1424	1.493
4-Isopropylbenzenesulfonamide	N	Test Set	1.09	1.55	0.55	0.91	1.52	0	0		1	68.54	52.016	-7.668	1.993	0	1	2.3872	0	1.145	-0.021	1.648	-0.377	3.081	-0.0691	6.9989	4.1446	1.8887	6.747	2.1419	0.253
4-Isopropylphenol	N	Test Set	0.79	0.89	0.55	0.38	1.198	0	0		1	20.23	43.045	-6.749	1.362	1	0	1.8734	0	0.643	-0.187	0.928	-0.793	2.258	-0.0489	4.9421	3.3933	2.0234	1.9504	0.7795	0.149
4-Methoxyaniline	N	Test Set	1.05	1.1	0.23	0.65	1.016	0	0		1	35.25	37.338	-5.82	1.232	0	2	1.5803	0	0.794	0.123	0.934	0.44	1.747	-0.0233	2.5111	0.8641	0.1522	4.3126	2.3336	1.081
4-Methoxyphenol	N	Test Set	0.9	1.17	0.57	0.48	0.975	0	0		1	29.46	34.957	-5.643	1.241	1	0	1.5345	0	0.798	-0.106	1.131	-0.602	2.558	-0.0488	4.9442	3.3753	2.0116	3.5089	1.3902	0.282
4-Methylacetanilide	N	Test Set	0.87	1.4	0.5	0.67	1.254	0	0		1	29.1	45.721	-7.086	1.492	0	1	1.9363	0	0.793	0.157	1.133	0.363	2.436	-0.0323	3.2868	1.9945	0.9575	6.099	3.3005	1.317
4-Methylacetophenone	N	Test Set	0.84	1	0	0.51	1.155	0	0		1	17.07	41.603	-6.576	1.342	0	0	1.7894	0	0.568	0.288	0.617	0.681	1.062	0	0.0048	0	0	4.9664	2.3334	0.708
4-Methylbenzaldehyde	N	Test Set	0.86	1	0	0.42	1.014	0	0		1	17.07	36.796	-5.928	1.202	0	0	1.584	0	0.526	0.252	0.55	0.573	0.882	0	0.0021	0	0	4.3774	1.8924	0.503
4-Methylbenzenesulfonamide	N	Test Set	1.1	1.55	0.55	0.87	1.238	0	0		1	68.54	42.402	-6.382	1.712	0	2	1.9424	0	1.133	-0.026	1.646	-0.367	3.069	-0.0686	6.9415	4.1026	1.8635	6.711	2.1471	0.266
4-Methylbenzoic acid	N	Test Set	0.73	0.9	0.6	0.38	1.073	0	0		1	40.13	36.425	-5.898	1.362	1	0	1.6745	0	0.87	-0.047	1.516	-0.759	4.049	-0.055	5.5394	4.0076	2.6794	5.733	2.3099	0.576
4-Methylbenzyl alcohol	N	Test Set	0.81	0.88	0.33	0.6	1.057	0	0		1	20.23	37.536	-6.174	1.222	1	0	1.6557	0	0.671	0.155	0.962	0.43	2.149	-0.0275	2.7728	1.5576	0.6951	5.0829	3.0501	1.474
4-Methylformanilide	N	Test Set	0.97	1.4	0.5	0.52	1.113	0	0		1	29.1	41.303	-6.36	1.352	0	1	1.7325	0	0.8	0.053	1.201	0.059	2.572	-0.0422	4.2965	2.6746	1.3455	5.7214	2.9516	1.081
4-Methylpentan-2-one	N	Test Set	0.11	0.65	0	0.51	0.97	0	0		0	17.07	31.156	-5.565	1.002	0	0	1.5163	0	0.45	0.327	0.576	0.725	1.082	0	0	0	0	5.025	2.4363	0.809
4-Methylphenyl acetate	N	Test Set	0.66	1.01	0	0.47	1.214	0	0		1	26.3	42.907	-6.937	1.502	0	0	1.9142	0	0.643	0.226	0.555	0.464	0.736	0	0.0206	0	0	3.7434	1.3798	0.269
4-Nitrophenol	N	Test Set	1.07	1.72	0.82	0.26	0.949	0	0		1	69.89	35.707	-4.898	1.391	1	0	1.5148	0	0.928	-0.304	1.547	-1.527	4.139	-0.0687	7.0664	5.0584	3.4504	2.5817	0.6579	0.062
4-Propylphenol	N	Test Set	0.79	0.88	0.55	0.37	1.198	0	0		1	20.23	43.045	-6.89	1.362	1	0	1.8741	0	0.644	-0.184	0.931	-0.791	2.26	-0.049	4.9482	3.3935	2.0231	1.9551	0.7839	0.151
4-tert-Butylphenol	N	Test Set	0.81	0.89	0.56	0.41	1.339	0	0		1	20.23	47.735	-7.17	1.502	1	0	2.0726	0	0.655	-0.186	0.937	-0.797	2.286	-0.0491	4.9546	3.4064	2.0377	1.9743	0.7984	0.157
4-tert-Pentylphenol	N	Test Set	0.81	0.89	0.56	0.41	1.48	0	0		1	20.23	52.542	-7.669	1.643	1	0	2.2863	0	0.647	-0.182	0.926	-0.777	2.257	-0.0486	4.9068	3.3676	2.0049	2.0002	0.8141	0.163
5-Methylhexan-2-one	N	Test Set	0.11	0.65	0	0.51	1.111	0	0		0	17.07	40.77	-6.964	1.282	0	0	1.9409	0	0.487	0.353	0.622	0.797	1.202	0	0	0	0	5.3369	2.6926	0.961
5-Methyloctan-2-one	N	Test Set	0.09	0.63	0	0.51	1.392	0	0		0	17.07	45.577	-7.707	1.422	0	0	2.1604	0	0.495	0.353	0.621	0.793	1.195	0	0	0	0	5.3158	2.6747	0.951
9-Methylanthracene	N	Test Set	2.29	1.3	0	0.26	1.595	0	0		3	0	66.42	-8.857	1.923	0	0	2.4458	0	0.471	-0.05	0.152	-0.035	0.06	0	0.0092	0	0	0	0	0
Acetamide	N	Test Set	0.46	1.3	0.54	0.68	0.506	0	0		0	43.09	14.635	-2.996	0.591	0	2	0.7952	0	0.878	0.325	1.797	1.141	4.386	-0.0505	5.0905	2.6933	0.9912	10.45	6.6813	3.456
Acetic acid	N	Test Set	0.27	0.65	0.61	0.44	0.465	0	0		0	40.13	11.558	-2.82	0.601	1	0	0.747	0	0.713	-0.031	1.295	-0.586	3.186	-0.0537	5.3766	3.7549	2.3648	4.9117	1.9464	0.433
Acetonitrile	N	Test Set	0.24	0.9	0.07	0.32	0.404	0	0		0	23.79	11.477	-2.695	0.411	0	0	0.6388	0	0.497	0.179	0.54	0.395	0.756	0	0.2633	0	0	3.3915	1.3447	0.319
Acetophenone	N	Test Set	0.82	1.01	0	0.48	1.014	0	0		1	17.07	36.637	-5.88	1.202	0	0	1.5739	0	0.559	0.245	0.586	0.597	0.96	0	0.0069	0	0	4.5472	2.0431	0.589
Acridine	N	Test Set	2.36	1.33	0	0.58	1.414	0	0		3	12.89	59.249	-7.981	1.792	0	0	2.1918	0	0.606	0.197	0.689	0.851	1.709	0	0.0142	0	0	4.2207	2.7107	1.53
Adamantane	N	Test Set	0.67	0.66	0	0.02	1.192	0	0		3	0	43.842	-6.236	1.362	0	0	1.822	0	0.069	0.005	0.006	0.001	0.001	0	0	0	0	0	0	0
Allylamine	N	Test Set	0.35	0.49	0.16	0.58	0.588	0	0		0	27.64	20.026	-3.735	0.571	0	2	0.9048	0	0.567	0.453	1.299	2.281	5.333	-0.0057	0.6771	0.0988	0.0003	6.2997	4.7777	3.522
a-Methylstyrene	N	Test Set	0.85	0.64	0	0.19	1.096	0	0		1	0	41.34	-6.577	1.182	0	0	1.6865	0	0.348	-0.001	0.117	0.002	0.048	0	0	0	0	0	0	0
Aniline	N	Test Set	0.96	0.96	0.26	0.41	0.816	0	0		1	26.02	30.846	-4.935	0.931	0	2	1.2539	0	0.616	-0.157	0.589	-0.407	0.835	-0.035	3.6051	1.5845	0.4377	0.2562	0.0314	0
Azulene	N	Test Set	1.34	1.17	0.15	0.16	1.085	0	0		2	0	41.946	-6.602	1.282	0	0	1.703	0	0.398	-0.023	0.149	-0.011	0.067	0	0.0002	0	0	0	0	0
Benz [a] anthracene	N	Test Set	2.99	1.7	0	0.33	1.823	0	0		4	0	78.96	-10.102	2.283	0	0	2.817	0	0.557	-0.099	0.192	-0.07	0.083	0	0.0412	0	0	0	0	0
Benzenesulfonamide	N	Test Set	1.13	1.55	0.55	0.8	1.097	0	0		1	68.54	37.436	-5.708	1.572	0	2	1.7315	0	1.129	-0.077	1.64	-0.459	3.049	-0.0692	7.0211	4.1582	1.9061	6.3126	1.9464	0.218
Benzo [ b] fluorene	N	Test Set	2.62	1.57	0	0.2	1.726	0	0		4	0	72.395	-9.748	2.163	0	0	2.6959	0	0.541	-0.046	0.177	-0.033	0.068	0	0.0001	0	0	0	0	0
Benzo [ghi] perylene	N	Test Set	4.07	1.9	0	0.46	2.084	0	0		6	0	96.344	-10.985	2.763	0	0	3.2129	0	0.564	-0.127	0.195	-0.086	0.088	0	0.0527	0	0	0	0	0
Benzonitrile	N	Test Set	0.74	1.11	0	0.33	0.871	0	0		1	23.79	31.157	-5.18	1.031	0	0	1.3609	0	0.508	0.114	0.447	0.271	0.543	0	0.109	0	0	2.5216	0.8516	0.144
Benzothiazole	N	Test Set	1.33	1.1	0	0.4	0.969	0	0		2	41.13	39.62	-6.24	1.352	0	0	1.5563	0	0.506	0.1	0.554	0.433	1.043	-0.0041	0.5696	0.0595	0	3.1628	1.8318	0.894
Benzoxazole	N	Test Set	0.9	1	0	0.38	0.864	0	0		2	26.03	34.009	-5.158	1.191	0	0	1.398	0	0.562	0.109	0.65	0.444	1.234	-0.0105	1.1235	0.2541	0.0051	3.4242	2.0321	1.002
Benzyl alcohol	N	Test Set	0.8	0.87	0.33	0.56	0.916	0	0		1	20.23	32.57	-5.466	1.081	1	0	1.4263	0	0.655	0.089	0.931	0.242	2.05	-0.0303	3.0599	1.7758	0.8263	4.5471	2.6739	1.229
Benzyl bromide	N	Test Set	1.01	0.98	0	0.2	1.032	0	0		1	0	39.278	-7.071	1.71	0	0	1.6274	0	0.457	-0.042	0.204	-0.04	0.11	0	0.0819	0	0	0	0	0
Benzyl chloride	N	Test Set	0.82	0.82	0	0.33	0.98	0	0		1	0	36.204	-6.502	1.266	0	0	1.5319	0	0.409	-0.049	0.171	-0.046	0.088	0	0.0689	0	0	0	0	0
Biphenyl	N	Test Set	1.36	0.99	0	0.22	1.324	0	0		2	0	51.878	-7.732	1.542	0	0	2.0232	0	0.463	-0.062	0.17	-0.051	0.078	0	0.0617	0	0	0	0	0
Bromoethane	N	Test Set	0.37	0.4	0	0.12	0.565	0	0		0	0	19.598	-4.638	1.09	0	0	0.8808	0	0.265	0.027	0.119	0.021	0.062	0	0.0015	0	0	0	0	0
But-1-yne	N	Test Set	0.18	0.23	0.12	0.15	0.586	0	0		0	0	19.504	-4.192	0.541	0	0	0.9155	0	0.327	0.007	0.231	-0.033	0.226	-0.0078	0.8279	0.205	0.0178	0.1773	0	0
Buta-1,3-diene	N	Test Set	0.32	0.23	0	0.1	0.586	0	0		0	0	20.394	-4.197	0.541	0	0	0.9182	0	0.241	0.009	0.087	0.01	0.038	0	0	0	0	0	0	0
Butanamide	N	Test Set	0.42	1.3	0.56	0.68	0.788	0	0		0	43.09	24.249	-4.311	0.871	0	2	1.2231	0	0.857	0.292	1.754	1.05	4.321	-0.0519	5.2369	2.8177	1.0392	9.908	6.4338	3.43
Butanoic acid	N	Test Set	0.21	0.62	0.6	0.45	0.747	0	0		0	40.13	21.172	-4.18	0.881	1	0	1.1864	0	0.687	-0.013	1.244	-0.55	3.1	-0.0527	5.2712	3.6715	2.3058	4.7315	1.9332	0.472
Butanone	N	Test Set	0.17	0.7	0	0.51	0.688	0	0		0	17.07	21.542	-4.161	0.721	0	0	1.076	0	0.471	0.377	0.657	0.852	1.279	0	0	0	0	5.7519	2.8481	1.007
Carbon disulfide	N	Test Set	0.88	0.21	0	0.07	0.491	0	0		0	38.8	20.465	-4.923	0.761	0	0	0.8367	0	0.029	-0.004	0.002	-0.001	0	0	0	0	0	0	0	0
Chlorobenzene	N	Test Set	0.72	0.65	0	0.07	0.839	0	0		1	0	31.452	-5.876	1.126	0	0	1.3264	0	0.294	-0.068	0.11	-0.051	0.054	0	0.024	0	0	0	0	0
Chloroethene	N	Test Set	0.26	0.38	0	0.05	0.47	0	0		0	0	16.05	-4.037	0.625	0	0	0.765	0	0.23	-0.064	0.114	-0.064	0.075	-0.0004	0.1813	0.0027	0	0	0	0
Chrysene	N	Test Set	3.03	1.73	0	0.33	1.823	0	0		4	0	78.96	-9.982	2.283	0	0	2.7973	0	0.563	-0.112	0.206	-0.085	0.099	0	0.1073	0	0	0	0	0
cis-1,2-Dichloroethene	N	Test Set	0.44	0.61	0.11	0.05	0.592	0	0		0	0	20.846	-5.113	0.969	0	0	0.9774	0	0.269	-0.136	0.191	-0.172	0.192	-0.0069	0.9508	0.0947	0	0	0	0
cis-Pent-2-ene	N	Test Set	0.14	0.08	0	0.07	0.77	0	0		0	0	25.675	-4.982	0.701	0	0	1.1769	0	0.17	0.048	0.07	0.047	0.05	0	0	0	0	0.1674	0.0071	0
Citric acid	N	Test Set	0.81	2.2		1.27	1.2359	0	0		0	140.62	31.644	-4.796	1.921	4	0	1.9485	0	1.456	-0.377	2.384	-1.933	5.993	-0.1018	10.6679	6.8211	4.3042	5.3278	1.4846	0.216
Cortisone	N	Test Set	1.96	3.5	0.36	1.87	2.7546	0	0		4	91.67	97.047	-11.355	3.625	2	0	4.361	0	1.898	0.739	3.254	1.584	7.411	-0.0781	7.9106	5.0262	2.6798	19.1821	9.9876	4.216
Cyclohexa- 1,3-diene	N	Test Set	0.52	0.3	0	0.14	0.759	0	0		1	0	27.894	-4.862	0.801	0	0	1.1619	0	0.25	0.065	0.108	0.058	0.064	0	0	0	0	0.0954	0	0
Cyclohexanol	N	Test Set	0.46	0.54	0.32	0.57	0.904	0	0		1	20.23	30.004	-5.03	1.002	1	0	1.3942	0	0.5	0.25	1.006	0.772	2.567	-0.0252	2.5442	1.3688	0.5616	6.1103	3.9528	2.103
Cyclohexene	N	Test Set	0.4	0.2	0	0.1	0.802	0	0		1	0	28.842	-4.997	0.821	0	0	1.2248	0	0.165	0.062	0.078	0.061	0.062	0	0	0	0	0.2517	0.0131	0
Cycloocta-1,5-diene	N	Test Set	0.6	0.36	0	0.2	1.041	0	0		1	0	37.508	-5.965	1.082	0	0	1.6062	0	0.25	0.089	0.117	0.085	0.086	0	0	0	0	0.3096	0.0118	0
Cyclooctanol	N	Test Set	0.58	0.54	0.32	0.58	1.186	0	0		1	20.23	39.618	-6.186	1.282	1	0	1.8318	0	0.505	0.263	0.994	0.817	2.562	-0.0235	2.3624	1.2734	0.515	6.0386	3.9291	2.14
Cyclopentanone	N	Test Set	0.37	0.86	0	0.52	0.72	0	0		1	17.07	24.235	-4.294	0.841	0	0	1.1391	0	0.469	0.371	0.63	0.802	1.181	0	0	0	0	5.5103	2.6283	0.88
Cyclopropane	N	Test Set	0.18	0.15	0	0	0.423	0	0		1	0	14.421	-3.397	0.421	0	0	0.7143	0	0.15	0.021	0.046	0.015	0.019	0	0	0	0	0	0	0
Decan-1-ol	N	Test Set	0.19	0.42	0.37	0.48	1.576	0	0		0	20.23	51.346	-8.964	1.583	1	0	2.4504	0	0.571	0.219	1.079	0.66	2.748	-0.0311	3.1259	1.7942	0.7987	6.1441	3.9393	2.093
Decan-2-one	N	Test Set	0.11	0.68	0	0.51	1.533	0	0		0	17.07	50.384	-8.674	1.563	0	0	2.3902	0	0.499	0.359	0.625	0.802	1.205	0	0	0	0	5.383	2.7094	0.96
Decanoic acid	N	Test Set	0.12	0.6	0.6	0.45	1.592	0	0		0	40.13	50.014	-8.527	1.723	1	0	2.4847	0	0.733	-0.008	1.223	-0.537	2.982	-0.0518	5.1862	3.5931	2.2373	4.6844	1.8334	0.393
Dibenz[c]anthracene	N	Test Set	4	1.93	0	--	2.192	0	0		5	0	94.84	-11.848	2.804	0	0	3.4002	0	0.684	-0.069	0.241	-0.058	0.108	0	0.0778	0	0	0	0	0
Dibenzofuran	N	Test Set	1.41	1.02	0	0.17	1.274	0	0		3	13.14	53.72	-7.483	1.682	0	0	2.0283	0	0.454	-0.048	0.188	-0.027	0.101	0	0.0225	0	0	0.089	0.0006	0
Dibenzothiophene	N	Test Set	1.96	1.31	0	0.18	1.379	0	0		3	28.24	59.331	-8.431	1.843	0	0	2.1689	0	0.439	-0.083	0.162	-0.062	0.075	0	0.0259	0	0	0	0	0
Dibromomethane	N	Test Set	0.71	0.67	0.1	0.1	0.6	0	0		0	0	22.661	-5.609	1.738	0	0	0.9575	0	0.338	-0.149	0.247	-0.214	0.26	-0.0124	1.493	0.2222	0	0	0	0
Dichloroacetic acid	N	Test Set	0.48	1.2	0.9	0.27	0.71	0	0		0	40.13	21.15	-5.12	1.289	1	0	1.2075	0	0.775	-0.569	1.648	-2.374	5.295	-0.0926	9.3072	6.5061	4.2638	1.4931	0.2892	0.006
Diethyl ether	N	Test Set	0.04	0.25	0	0.45	0.731	0	0		0	9.23	22.427	-4.722	0.741	0	0	1.1308	0	0.312	0.303	0.501	0.752	1.188	0	0	0	0	4.3989	2.5972	1.196
Diisopropyl ether	N	Test Set	0	0.19	0	0.41	1.013	0	0		0	9.23	32.041	-6.217	1.022	0	0	1.5704	0	0.316	0.304	0.497	0.753	1.196	0	0	0	0	4.3529	2.5801	1.201
Diisopropyl sulfide	N	Test Set	0.33	0.32	0	0.37	1.118	0	0		0	25.3	38.547	-6.807	1.182	0	0	1.7544	0	0.328	0.181	0.269	0.289	0.369	0	0	0	0	2.0048	0.7007	0.114
Dimethyl amine	N	Test Set	0.19	0.3	0.08	0.66	0.49	0	0		0	16.61	15.787	-3.341	0.451	0	1	0.7578	0	0.381	0.43	1.105	2.105	4.803	-0.0033	0.421	0.0527	0	5.8716	4.4744	3.224
Dimethyl disulfide	N	Test Set	0.7	0.44	0	0.28	0.717	0	0		0	50.6	26.91	-5.613	0.942	0	0	1.1849	0	0.342	0.05	0.188	0.067	0.133	0	0.0103	0	0	0.2918	0.021	0
Dimethyl phthalate	N	Test Set	0.78	1.41	0	0.88	1.429	0	0		1	52.6	49.001	-7.517	1.942	0	0	2.2803	0	0.876	0.365	0.847	0.733	1.135	0	0.0283	0	0	5.9289	2.0436	0.338
Dimethyl sulfoxide	N	Test Set	0.52	1.74	0	0.88	0.613	0	0		0	45.53	21.948	-4.077	0.781	0	0	0.9893	0	0.85	0.823	1.892	2.975	5.624	-0.0002	0.1491	0.0021	0	13.5536	9.5397	5.915
Di-n-butylamine	N	Test Set	0.11	0.3	0.08	0.69	1.335	0	0		0	16.61	44.629	-7.829	1.292	0	1	2.0545	0	0.379	0.392	0.92	1.769	3.877	-0.0008	0.1512	0.0086	0	5.1405	3.9184	2.828
Di-n-propylamine	N	Test Set	0.12	0.3	0.08	0.69	1.054	0	0		0	16.61	35.015	-6.35	1.012	0	1	1.6182	0	0.363	0.389	0.921	1.782	3.925	-0.0008	0.1489	0.0079	0	5.1228	3.9066	2.822
Diphenyl ether	N	Test Set	1.22	1.08	0	0.2	1.383	0	0		2	9.23	52.958	-8.03	1.702	0	0	2.1598	0	0.516	-0.021	0.225	0.014	0.142	0	0.0102	0	0	0.3836	0.0775	0.001
Diphenylmethane	N	Test Set	1.22	1.04	0	0.28	1.465	0	0		2	0	55.895	-8.433	1.682	0	0	2.2837	0	0.497	0.003	0.168	0.001	0.064	0	0	0	0	0	0	0
Dodecan- 1-ol	N	Test Set	0.18	0.42	0.37	0.48	1.858	0	0		0	20.23	60.96	-10.445	1.863	1	0	2.886	0	0.586	0.22	1.077	0.659	2.736	-0.031	3.1193	1.787	0.7917	6.122	3.9223	2.083
Eicosanoic acid	N	Test Set	0.01	0.6	0.6	0.45	3.001	0	0		0	40.13	98.084	-15.923	3.125	1	0	4.6902	0	0.816	0.002	1.237	-0.519	3.003	-0.0518	5.1794	3.5884	2.2363	4.7845	1.8859	0.419
Ethane	N	Test Set	0	0	0	0	0.39	0	0		0	0	11.728	-2.933	0.301	0	0	0.5859	0	0.047	0	0.004	0	0	0	0	0	0	0	0	0
Ethanol	N	Test Set	0.25	0.42	0.37	0.48	0.449	0	0		0	20.23	12.89	-3.024	0.461	1	0	0.6987	0	0.522	0.227	1.116	0.743	2.924	-0.0311	3.1253	1.7941	0.798	6.3708	4.1545	2.276
Ethyl acetate	N	Test Set	0.11	0.62	0	0.45	0.747	0	0		0	26.3	22.627	-4.548	0.881	0	0	1.1792	0	0.532	0.359	0.63	0.726	1.042	0	0.0001	0	0	5.2662	2.2869	0.585
Ethyl acrylate	N	Test Set	0.21	0.64	0	0.42	0.845	0	0		0	26.3	26.96	-5.118	1.001	0	0	1.3441	0	0.502	0.264	0.52	0.519	0.761	0	0.0122	0	0	4.0442	1.5464	0.286
Ethyl butanoate	N	Test Set	0.07	0.58	0	0.45	1.028	0	0		0	26.3	32.241	-6.003	1.162	0	0	1.6051	0	0.512	0.356	0.581	0.69	0.962	0	0	0	0	4.9712	2.1212	0.517
Ethyl formate	N	Test Set	0.15	0.66	0	0.38	0.606	0	0		0	26.3	18.209	-3.772	0.741	0	0	0.9691	0	0.509	0.27	0.558	0.526	0.816	0	0.1357	0	0	4.2152	1.579	0.306
Ethyl hexanoate	N	Test Set	0.04	0.58	0	0.45	1.31	0	0		0	26.3	41.855	-7.441	1.442	0	0	2.0462	0	0.502	0.338	0.546	0.64	0.885	0	0	0	0	4.6967	1.9258	0.448
Ethyl methacrylate	N	Test Set	0.2	0.6	0	0.45	0.986	0	0		0	26.3	31.767	-5.793	1.141	0	0	1.5485	0	0.478	0.294	0.522	0.595	0.846	0	0.0002	0	0	4.4861	1.9311	0.427
Ethyl phenyl ketone	N	Test Set	0.8	0.95	0	0.51	1.155	0	0		1	17.07	41.444	-6.595	1.342	0	0	1.7818	0	0.538	0.229	0.535	0.544	0.862	0	0.0066	0	0	4.1296	1.8556	0.515
Ethyl-4-aminobenzoate	N	Test Set	1.04	1.52	0.32	0.59	1.313	0	0		1	52.32	46.933	-7.152	1.652	0	2	2.0424	0	0.938	0.078	1.222	0.183	2.159	-0.0447	4.5298	2.1286	0.6308	6.0822	2.8228	0.788
Ethylamine	N	Test Set	0.24	0.35	0.16	0.61	0.49	0	0		0	27.64	15.693	-3.174	0.451	0	2	0.7432	0	0.472	0.52	1.442	2.855	6.816	-0.0031	0.479	0.0367	0	6.9909	5.4035	4.041
Ethyne	N	Test Set	0.19	0.25	0.21	0.15	0.304	0	0		0	0	9.89	-2.678	0.26	0	0	0.5024	0	0.348	-0.167	0.378	-0.343	0.535	-0.0282	2.93	1.0433	0.1526	0	0	0
Felodipine	N	Test Set	1.75	2.17	0.32	1.37	2.71	0	0		2	64.63	94.2	-14.124	3.843	0	1	4.3221	0	1.208	0.275	1.607	0.538	3.381	-0.0388	3.9481	2.5282	1.4212	9.0436	4.859	1.749
Fluoranthrene	N	Test Set	2.38	1.55	0	0.2	1.585	0	0		4	0	68.378	-9.048	2.023	0	0	2.4885	0	0.483	-0.075	0.159	-0.051	0.064	0	0.001	0	0	0	0	0
Fluorene	N	Test Set	1.59	1.06	0	0.2	1.357	0	0		3	0	54.889	-7.949	1.662	0	0	2.1202	0	0.452	-0.017	0.152	-0.013	0.059	0	0	0	0	0	0	0
Fluorobenzene	N	Test Set	0.48	0.57	0	0.1	0.734	0	0		1	0	26.4	-4.756	0.961	0	0	1.1871	0	0.293	-0.055	0.113	-0.043	0.055	0	0.0265	0	0	0	0	0
Formaldehyde	N	Test Set	0.22	0.7	0	0.33	0.265	0	0		1	17.07	7.51	-1.978	0.3	0	0	0.4327	0	0.356	0.165	0.356	0.319	0.475	0	0	0	0	2.4827	0.8422	0.143
Hept- 1-yne	N	Test Set	0.16	0.23	0.12	0.1	1.009	0	0		0	0	33.925	-6.426	0.962	0	0	1.5791	0	0.343	0.017	0.228	-0.028	0.223	-0.0077	0.8166	0.2	0.0175	0.175	0	0
Heptan- 1-ol	N	Test Set	0.21	0.42	0.37	0.48	1.154	0	0		0	20.23	36.925	-6.743	1.162	1	0	1.7965	0	0.546	0.217	1.075	0.658	2.739	-0.031	3.1182	1.7889	0.7958	6.1331	3.9283	2.085
Heptan-2-one	N	Test Set	0.12	0.68	0	0.51	1.111	0	0		0	17.07	35.963	-6.445	1.142	0	0	1.731	0	0.476	0.357	0.622	0.799	1.202	0	0	0	0	5.3759	2.7034	0.956
Heptan-3-ol	N	Test Set	0.18	0.36	0.33	0.56	1.154	0	0		0	20.23	36.925	-6.615	1.162	1	0	1.7894	0	0.463	0.219	0.811	0.631	1.96	-0.019	1.9269	1.0156	0.3904	5.145	3.227	1.606
Hexa-1,4-diene	N	Test Set	0.24	0.2	0	0.1	0.868	0	0		0	0	30.008	-5.693	0.821	0	0	1.3483	0	0.274	0.064	0.114	0.061	0.069	0	0	0	0	0.144	0.0007	0
Hexachlorobenzene	N	Test Set	1.49	0.99	0	0	1.451	0	0		1	0	56.502	-10.662	2.848	0	0	2.3872	0	0.196	-0.023	0.032	-0.01	0.008	0	0	0	0	0	0	0
Hexachloroethane	N	Test Set	0.68	0.22	0	0.06	1.125	0	0		0	0	40.58	-8.744	2.367	0	0	1.9252	0	0.141	-0.041	0.032	-0.017	0.011	0	0	0	0	0	0	0
Hexadecanoic acid	N	Test Set	0.04	0.6	0.6	0.45	2.437	0	0		0	40.13	78.856	-13.072	2.564	1	0	3.8197	0	0.783	-0.001	1.234	-0.525	3.002	-0.0518	5.1862	3.5941	2.2404	4.7596	1.8682	0.413
Hexan-2-ol	N	Test Set	0.19	0.36	0.33	0.56	1.013	0	0		0	20.23	32.118	-5.876	1.022	1	0	1.5754	0	0.495	0.203	0.917	0.622	2.254	-0.0246	2.4813	1.3118	0.534	5.5012	3.4932	1.775
Hexan-2-one	N	Test Set	0.14	0.68	0	0.51	0.97	0	0		0	17.07	31.156	-5.651	1.002	0	0	1.5142	0	0.475	0.38	0.642	0.838	1.247	0	0	0	0	5.6526	2.7858	0.978
Hexanal	N	Test Set	0.15	0.65	0	0.45	0.97	0	0		0	17.07	31.156	-5.724	1.002	0	0	1.5167	0	0.423	0.298	0.483	0.579	0.812	0	0	0	0	4.128	1.7509	0.482
I-Cyanobutane	N	Test Set	0.18	0.9	0	0.36	0.827	0	0		0	23.79	25.898	-4.913	0.831	0	0	1.29	0	0.469	0.236	0.475	0.447	0.685	0	0.0492	0	0	3.3547	1.307	0.3
Indene	N	Test Set	1	0.77	0	0.2	0.988	0	0		2	0	39.385	-6.127	1.162	0	0	1.545	0	0.363	0.006	0.131	0.005	0.055	0	0	0	0	0	0	0
Iodoethane	N	Test Set	0.64	0.4	0	0.15	0.649	0	0		0	0	24.691	-5.242	1.56	0	0	0.9829	0	0.263	0.015	0.108	0.008	0.052	0	0.0025	0	0	0	0	0
Iodomethane	N	Test Set	0.68	0.43	0	0.13	0.508	0	0		0	0	19.884	-4.58	1.419	0	0	0.7679	0	0.255	-0.013	0.12	-0.018	0.065	0	0.0279	0	0	0	0	0
Isobutanal	N	Test Set	0.14	0.62	0	0.45	0.688	0	0		0	17.07	21.542	-4.173	0.721	0	0	1.0799	0	0.394	0.274	0.455	0.54	0.76	0	0	0	0	3.873	1.6324	0.442
Isobutene	N	Test Set	0.1	0.08	0	0.07	0.629	0	0		0	0	20.868	-4.255	0.561	0	0	0.9743	0	0.176	0.048	0.076	0.05	0.053	0	0	0	0	0.1837	0.0056	0
Isobutyl acetate	N	Test Set	0.05	0.57	0	0.47	1.028	0	0		0	26.3	32.241	-5.983	1.162	0	0	1.6344	0	0.514	0.35	0.605	0.716	1.034	0	0	0	0	5.1516	2.3032	0.634
Isobutyl acrylate	N	Test Set	0.16	0.59	0	0.42	1.126	0	0		0	26.3	36.574	-6.556	1.282	0	0	1.7852	0	0.505	0.282	0.535	0.565	0.827	0	0.0104	0	0	4.4025	1.779	0.36
Isobutyl isobutanoate	N	Test Set	0	0.5	0	0.47	1.31	0	0		0	26.3	41.855	-7.358	1.442	0	0	2.074	0	0.471	0.335	0.523	0.638	0.876	0	0	0	0	4.6151	1.982	0.475
Isobutylamine	N	Test Set	0.2	0.32	0.16	0.63	0.772	0	0		0	27.64	25.307	-4.526	0.731	0	2	1.1845	0	0.47	0.49	1.348	2.622	6.181	-0.003	0.4571	0.0387	0	6.6118	5.104	3.835
Isopentyl acetate	N	Test Set	0.05	0.57	0	0.47	1.169	0	0		0	26.3	37.048	-6.625	1.302	0	0	1.8399	0	0.546	0.364	0.621	0.72	1.029	0	0.0002	0	0	5.2125	2.2556	0.581
Isopentyl formate	N	Test Set	0.09	0.6	0	0.4	1.028	0	0		0	26.3	32.63	-5.855	1.162	0	0	1.6329	0	0.52	0.275	0.546	0.518	0.799	0	0.1477	0	0	4.1402	1.5392	0.294
Isophthalicacid	N	Test Set	1.1	1.21	0.96	0.59	1.147	0	0		1	80.26	36.476	-5.773	1.661	2	0	1.8249	0	1.356	-0.401	2.721	-2.419	7.755	-0.1224	12.3508	8.9425	6.0031	7.1184	2.4215	0.435
Isopropyl acetate	N	Test Set	0.06	0.57	0	0.47	0.888	0	0		0	26.3	27.434	-5.233	1.021	0	0	1.408	0	0.511	0.354	0.6	0.702	0.996	0	0	0	0	5.026	2.1665	0.559
Isopropyl formate	N	Test Set	0.09	0.6	0	0.4	0.747	0	0		0	26.3	23.016	-4.457	0.881	0	0	1.1981	0	0.49	0.276	0.533	0.524	0.787	0	0.1012	0	0	4.1028	1.5274	0.301
Isopropylamine	N	Test Set	0.18	0.32	0.16	0.61	0.631	0	0		0	27.64	20.5	-3.884	0.591	0	2	0.9744	0	0.473	0.523	1.4	2.802	6.623	-0.0022	0.3659	0.0257	0	6.8618	5.3256	3.979
Isopropylbenzene	N	Test Set	0.6	0.49	0	0.16	1.139	0	0		1	0	41.022	-6.715	1.202	0	0	1.7633	0	0.289	0.018	0.088	0.011	0.033	0	0	0	0	0	0	0
Lactic acid	N	Test Set	0.35	0.86	0.72	0.72	0.6644	0	0		0	60.36	17.526	-3.546	0.901	2	0	1.06	0	0.912	-0.105	1.837	-0.969	5.166	-0.0749	7.523	5.3487	3.4536	6.0394	2.9984	1.24
m-Cresol	N	Test Set	0.82	0.88	0.57	0.34	0.916	0	0		1	20.23	33.431	-5.454	1.081	1	0	1.4261	0	0.634	-0.196	0.935	-0.829	2.293	-0.0495	4.9985	3.4474	2.0806	1.8526	0.7231	0.128
Methyl 2-methylbenzoate	N	Test Set	0.77	0.87	0	0.43	1.214	0	0		1	26.3	42.688	-6.874	1.502	0	0	1.9008	0	0.532	0.226	0.496	0.494	0.744	0	0	0	0	3.9388	1.6367	0.341
Methyl benzoate	N	Test Set	0.73	0.85	0	0.46	1.073	0	0		1	26.3	37.722	-6.237	1.362	0	0	1.687	0	0.566	0.204	0.499	0.437	0.678	0	0.0003	0	0	3.5977	1.3496	0.223
Methyl decanoate	N	Test Set	0.05	0.6	0	0.45	1.733	0	0		0	26.3	56.276	-9.681	1.863	0	0	2.7196	0	0.552	0.335	0.568	0.637	0.898	0	0	0	0	4.6997	1.9281	0.44
Methyl n-propyl ether	N	Test Set	0.06	0.25	0	0.45	0.731	0	0		0	9.23	22.427	-4.699	0.741	0	0	1.1431	0	0.314	0.303	0.504	0.752	1.191	0	0	0	0	4.3965	2.5927	1.212
Methyl paraben	N	Test Set	0.9	1.37	0.69	0.45	1.132	0	0		1	46.53	39.745	-6.059	1.522	1	0	1.7968	0	1.109	0.043	1.84	-0.404	4.415	-0.06	6.1012	4.3091	2.8102	8.0703	3.5832	1.027
Methyl pentanoate	N	Test Set	0.11	0.6	0	0.45	1.028	0	0		0	26.3	32.241	-5.978	1.162	0	0	1.6214	0	0.515	0.332	0.569	0.645	0.911	0	0	0	0	4.7442	1.9602	0.455
Methyl phenyl ether	N	Test Set	0.71	0.75	0	0.29	0.916	0	0		1	20.23	33.272	-5.619	1.081	0	0	1.4284	0	0.434	0.083	0.259	0.153	0.259	0	0.0026	0	0	1.2114	0.4036	0.057
Methyl phenyl sulfone	N	Test Set	1.08	1.85	0	0.76	1.138	0	0		1	42.52	39.536	-6.156	1.562	0	0	1.7964	0	0.92	0.328	1.017	0.746	1.419	-0.0031	0.6063	0.0338	0	7.125	2.571	0.397
Methyl phenylacetate	N	Test Set	0.7	1.13	0	0.58	1.214	0	0		1	26.3	42.307	-6.913	1.502	0	0	1.9297	0	0.676	0.245	0.565	0.488	0.744	0	0.0003	0	0	3.8799	1.4387	0.253
Methyl propanoate	N	Test Set	0.13	0.6	0	0.45	0.747	0	0		0	26.3	22.627	-4.503	0.881	0	0	1.1828	0	0.505	0.326	0.57	0.64	0.908	0	0	0	0	4.7367	1.9559	0.445
Methylcyclohexane	N	Test Set	0.24	0.1	0	0	0.986	0	0		1	0	33.649	-5.566	0.982	0	0	1.4926	0	0.071	0.004	0.006	0.001	0.001	0	0	0	0	0	0	0
Methylcyclopentane	N	Test Set	0.23	0.1	0	0	0.845	0	0		1	0	28.842	-5.123	0.842	0	0	1.3194	0	0.07	0.003	0.007	0	0.001	0	0	0	0	0	0	0
m-Toluidine	N	Test Set	0.95	0.95	0.23	0.45	0.957	0	0		1	26.02	35.812	-5.627	1.072	0	2	1.4705	0	0.634	-0.012	0.689	0.048	1.18	-0.026	2.7597	1.0097	0.2019	2.1281	1.2673	0.629
n,n-Dimethylacetamide	N	Test Set	0.36	1.33	0	0.78	0.788	0	0		0	20.31	24.438	-4.637	0.871	0	0	1.2254	0	0.674	0.705	1.385	2.185	3.794	0	0	0	0	11.1207	7.4761	4.172
n,n-Dimethylaniline	N	Test Set	0.96	0.84	0	0.41	1.098	0	0		1	3.24	40.649	-6.483	1.212	0	0	1.6807	0	0.403	0.077	0.175	0.067	0.095	0	0	0	0	0.0206	0	0
n,n-Dimethylbenzamide	N	Test Set	0.95	1.4	0	0.98	1.255	0	0		1	20.31	44.34	-7.014	1.492	0	0	1.9617	0	0.737	0.537	1.105	1.548	2.607	0	0.001	0	0	8.9094	5.6178	2.758
n,n-DimethylbenzenesuIfonamide	N	Test Set	1.1	1.5	0	0.86	1.379	0	0		1	45.76	47.239	-7.178	1.852	0	0	2.1843	0	0.81	0.343	0.774	0.645	0.98	0	0.0517	0	0	5.4173	1.557	0.143
n,n-Dimethylbenzylamine	N	Test Set	0.67	0.8	0	0.69	1.239	0	0		1	4.44	45.176	-7.143	1.352	0	0	1.9331	0	0.402	0.198	0.441	0.649	1.221	0	0	0	0	2.5808	1.8547	1.217
n,n-Dimethylpropanamide	N	Test Set	0.34	1.3	0	0.78	0.929	0	0		0	20.31	29.245	-5.344	1.012	0	0	1.4297	0	0.633	0.655	1.271	2.015	3.489	0	0	0	0	10.1832	6.8771	3.888
Naphthalene	N	Test Set	1.34	0.92	0	0.2	1.085	0	0		2	0	43.948	-6.54	1.282	0	0	1.6733	0	0.37	-0.035	0.12	-0.024	0.045	0	0	0	0	0	0	0
n-Butane	N	Test Set	0	0	0	0	0.672	0	0		0	0	21.342	-4.43	0.581	0	0	1.0258	0	0.062	0.002	0.006	0	0.001	0	0	0	0	0	0	0
n-Butyl benzoate	N	Test Set	0.67	0.8	0	0.46	1.495	0	0		1	26.3	52.143	-8.438	1.782	0	0	2.3323	0	0.559	0.241	0.499	0.49	0.725	0	0.0002	0	0	3.8662	1.5247	0.286
n-Butyl methacrylate	N	Test Set	0.17	0.6	0	0.45	1.268	0	0		0	26.3	41.381	-7.288	1.422	0	0	1.9885	0	0.482	0.303	0.517	0.599	0.846	0	0.0002	0	0	4.484	1.9379	0.431
n-Butyl pentanoate	N	Test Set	0.03	0.56	0	0.45	1.451	0	0		0	26.3	46.662	-8.144	1.582	0	0	2.2602	0	0.5	0.346	0.543	0.646	0.89	0	0	0	0	4.6935	1.9532	0.463
n-Butyl-4-aminobenzoate	N	Test Set	1.02	1.47	0.32	0.59	1.595	0	0		1	52.32	56.547	-8.64	1.932	0	2	2.4821	0	0.942	0.084	1.217	0.18	2.157	-0.0448	4.5405	2.1374	0.6359	6.0432	2.8125	0.784
n-Butylacetamide	N	Test Set	0.36	1.3	0.4	0.74	1.07	0	0		0	29.1	33.958	-6.186	1.152	0	1	1.6687	0	0.754	0.501	1.495	1.553	3.791	-0.0243	2.4788	1.2945	0.474	10.3041	6.694	3.558
N-Butylbenzene	N	Test Set	0.6	0.51	0	0.15	1.28	0	0		1	0	45.829	-7.596	1.342	0	0	1.9868	0	0.295	0.023	0.091	0.014	0.035	0	0	0	0	0	0	0
n-Decylbenzene	N	Test Set	0.58	0.47	0	0.15	2.125	0	0		1	0	74.671	-12.039	2.184	0	0	3.3041	0	0.342	0.028	0.095	0.015	0.035	0	0	0	0	0	0	0
N-Ethylpiperidine	N	Test Set	0.3	0.32	0	0.63	1.086	0	0		1	4.44	35.093	-6.071	1.132	0	0	1.6601	0	0.255	0.291	0.574	1.089	2.156	0	0	0	0	3.6881	2.7557	1.908
n-Heptane	N	Test Set	0	0	0	0	1.095	0	0		0	0	35.763	-6.593	1.002	0	0	1.6764	0	0.085	0.004	0.008	0.001	0.001	0	0	0	0	0	0	0
n-Hexylamine	N	Test Set	0.2	0.35	0.16	0.61	1.054	0	0		0	27.64	34.921	-6.097	1.012	0	2	1.617	0	0.499	0.523	1.427	2.805	6.62	-0.0027	0.4482	0.0331	0	6.9767	5.4597	4.092
n-Hexylbenzene	N	Test Set	0.59	0.5	0	0.15	1.562	0	0		1	0	55.443	-9.073	1.623	0	0	2.4252	0	0.311	0.026	0.092	0.015	0.035	0	0	0	0	0	0	0
Nitrobenzene	N	Test Set	0.87	1.11	0	0.28	0.891	0	0		1	49.66	33.684	-4.881	1.231	0	0	1.4126	0	0.521	0.062	0.371	0.125	0.334	0	0.0805	0	0	1.168	0.2463	0.009
Nitroethane	N	Test Set	0.27	0.95	0.02	0.33	0.565	0	0		0	49.66	18.253	-3.116	0.751	0	0	0.9063	0	0.521	0.087	0.417	0.135	0.405	-0.0003	0.2583	0.003	0	1.3925	0.2545	0.007
n-Methylformamide	N	Test Set	0.41	1.3	0.4	0.55	0.506	0	0		0	29.1	15.119	-3.206	0.591	0	1	0.8029	0	0.765	0.382	1.537	1.188	3.723	-0.0353	3.5674	1.9777	0.7771	9.8493	6.2242	3.095
n-Methylimidazole	N	Test Set	0.59	0.95	0	0.83	0.677	0	0		1	17.82	23.489	-4.357	0.821	0	0	1.093	0	0.688	0.496	1.29	1.976	4.034	-0.0005	0.2047	0.0024	0	7.9719	5.5079	3.496
N-Methylpyrrole	N	Test Set	0.56	0.79	0	0.31	0.718	0	0		1	4.93	25.694	-4.825	0.811	0	0	1.1448	0	0.433	0.105	0.279	0.144	0.233	0	0.0208	0	0	0.9432	0.0808	0
n-Octylamine	N	Test Set	0.19	0.35	0.16	0.61	1.335	0	0		0	27.64	44.535	-7.575	1.292	0	2	2.0525	0	0.516	0.527	1.436	2.826	6.678	-0.0027	0.4459	0.0325	0	7.0007	5.4814	4.112
Non-1-yne	N	Test Set	0.15	0.23	0.12	0.1	1.291	0	0		0	0	43.539	-7.907	1.242	0	0	2.02	0	0.358	0.018	0.229	-0.028	0.222	-0.0076	0.8145	0.1989	0.0173	0.1737	0	0
n-Pentane	N	Test Set	0	0	0	0	0.813	0	0		0	0	26.149	-5.007	0.722	0	0	1.2403	0	0.07	0.002	0.007	0	0.001	0	0	0	0	0	0	0
n-Pentyl propanoate	N	Test Set	0.05	0.56	0	0.45	1.31	0	0		0	26.3	41.855	-7.491	1.442	0	0	2.0427	0	0.519	0.357	0.571	0.679	0.942	0	0	0	0	4.8784	2.0749	0.499
n-Pentylbenzene	N	Test Set	0.59	0.51	0	0.15	1.421	0	0		1	0	50.636	-8.336	1.483	0	0	2.2069	0	0.303	0.025	0.091	0.014	0.035	0	0	0	0	0	0	0
n-Propyl benzoate	N	Test Set	0.68	0.8	0	0.46	1.354	0	0		1	26.3	47.336	-7.707	1.642	0	0	2.1154	0	0.553	0.239	0.5	0.491	0.727	0	0.0002	0	0	3.8694	1.5299	0.29
n-Propyl phenyl ether	N	Test Set	0.68	0.7	0	0.32	1.198	0	0		1	9.23	42.548	-7.132	1.362	0	0	1.8546	0	0.433	0.101	0.248	0.166	0.255	0	0.0025	0	0	1.1932	0.4029	0.071
n-Propyl propanoate	N	Test Set	0.07	0.56	0	0.45	1.028	0	0		0	26.3	32.241	-6.016	1.162	0	0	1.6086	0	0.506	0.355	0.574	0.682	0.948	0	0	0	0	4.9103	2.0907	0.503
n-Tridecane	N	Test Set	0	0	0	0	1.94	0	0		0	0	64.605	-11.056	1.844	0	0	2.9904	0	0.133	0.009	0.012	0.002	0.001	0	0	0	0	0	0	0
n-Undecane	N	Test Set	0	0	0	0	1.659	0	0		0	0	54.991	-9.572	1.563	0	0	2.5537	0	0.117	0.007	0.011	0.001	0.001	0	0	0	0	0	0	0
Oct-1-ene	N	Test Set	0.09	0.08	0	0.07	1.193	0	0		0	0	40.096	-7.275	1.122	0	0	1.8509	0	0.198	0.045	0.068	0.038	0.041	0	0	0	0	0.0971	0	0
Octan-1-ol	N	Test Set	0.2	0.42	0.37	0.48	1.295	0	0		0	20.23	41.732	-7.461	1.302	1	0	2.0125	0	0.544	0.228	1.009	0.67	2.507	-0.0271	2.7341	1.5078	0.647	5.9501	3.7629	1.955
Octan-4-ol	N	Test Set	0.16	0.36	0.33	0.56	1.295	0	0		0	20.23	41.732	-7.35	1.302	1	0	2.005	0	0.47	0.218	0.805	0.616	1.933	-0.0191	1.9313	1.0219	0.3946	5.1049	3.1894	1.571
Octanal	N	Test Set	0.16	0.65	0	0.45	1.252	0	0		0	17.07	40.77	-7.156	1.282	0	0	1.9546	0	0.439	0.3	0.486	0.581	0.815	0	0	0	0	4.1331	1.7584	0.484
o-Xylene	N	Test Set	0.66	0.56	0	0.16	0.998	0	0		1	0	36.374	-6.031	1.062	0	0	1.5348	0	0.284	0.029	0.094	0.022	0.038	0	0	0	0	0	0	0
Pent-1-yne	N	Test Set	0.17	0.23	0.12	0.12	0.727	0	0		0	0	24.311	-4.949	0.681	0	0	1.1399	0	0.329	0.012	0.228	-0.031	0.223	-0.0078	0.8249	0.2034	0.0179	0.1707	0	0
Pentan-2-ol	N	Test Set	0.2	0.36	0.33	0.56	0.872	0	0		0	20.23	27.311	-5.129	0.882	1	0	1.356	0	0.487	0.207	0.917	0.644	2.263	-0.0242	2.4463	1.2831	0.5081	5.5348	3.5247	1.803
Pentan-3-one	N	Test Set	0.15	0.66	0	0.51	0.829	0	0		0	17.07	26.349	-4.881	0.861	0	0	1.2826	0	0.447	0.363	0.614	0.814	1.216	0	0	0	0	5.3516	5.3958	0.99
Phenanthrene	N	Test Set	2.06	1.29	0	0.26	1.454	0	0		3	0	61.454	-8.282	1.782	0	0	2.2408	0	0.466	-0.072	0.16	-0.052	0.068	0	0.0308	0	0	0	0	0
Phenol	N	Test Set	0.81	0.89	0.6	0.3	0.775	0	0		1	20.23	28.465	-4.752	0.941	1	0	1.2081	0	0.636	-0.231	0.957	-0.91	2.387	-0.0509	5.1472	3.5703	2.1878	1.7357	0.6693	0.11
Phenylethyne	N	Test Set	0.68	0.58	0.12	0.24	0.912	0	0		1	0	34.377	-5.949	1.021	0	0	1.4349	0	0.428	-0.114	0.262	-0.171	0.263	-0.0117	1.2198	0.3914	0.0461	0	0	0
Phenylmethyl sulfide	N	Test Set	1.07	0.92	0	0.26	1.028	0	0		1	25.3	38.163	-6.623	1.242	0	0	1.5915	0	0.431	0.004	0.194	0.017	0.111	0	0.0076	0	0	0.1592	0.0069	0
Phthalicacid	N	Test Set	0.94	1.46	1.14	0.77	1.15	0	0		1	80.26	36.476	-5.724	1.661	2	0	1.8303	0	1.274	-0.449	2.448	-2.304	6.744	-0.1191	11.9827	8.6273	5.6719	5.666	1.7906	0.27
Piperidlne	N	Test Set	0.42	0.46	0.1	0.69	0.804	0	0		1	16.61	25.385	-4.676	0.852	0	1	1.223	0	0.362	0.406	1.038	2.003	4.572	-0.0026	0.3473	0.0356	0	5.4471	4.209	3.071
Propan-2-ol	N	Test Set	0.21	0.36	0.33	0.56	0.59	0	0		0	20.23	17.697	-3.722	0.601	1	0	0.9218	0	0.507	0.248	1.024	0.8	2.622	-0.0254	2.5576	1.3594	0.5482	6.2099	4.0435	2.173
Propanal	N	Test Set	0.2	0.65	0	0.45	0.547	0	0		0	17.07	16.735	-3.494	0.581	0	0	0.8539	0	0.415	0.279	0.499	0.584	0.849	0	0	0	0	4.1946	1.8514	0.529
Propene	N	Test Set	0.1	0.08	0	0.07	0.488	0	0		0	0	16.061	-3.568	0.421	0	0	0.7525	0	0.166	0.038	0.07	0.038	0.043	0	0	0	0	0.1056	0	0
p-Xylene	N	Test Set	0.61	0.52	0	0.16	0.998	0	0		1	0	36.374	-6.121	1.062	0	0	1.5363	0	0.276	0.028	0.089	0.021	0.036	0	0	0	0	0	0	0
Pyrazole	N	Test Set	0.62	1	0.54	0.45	0.536	0	0		1	28.68	18.588	-3.42	0.681	0	1	0.8622	0	0.737	-0.03	1.402	0.007	3.631	-0.0521	5.3222	3.4727	1.9219	5.2718	3.3218	1.853
Pyridazine	N	Test Set	0.67	0.85	0	0.81	0.634	0	0		1	25.78	22.032	-3.82	0.801	0	0	1.0096	0	0.701	0.503	1.281	1.754	3.381	0	0.206	0	0	8.8723	5.7171	3.226
Pyridine	N	Test Set	0.63	0.84	0	0.52	0.675	0	0		1	12.89	24.237	-4.298	0.791	0	0	1.0532	0	0.464	0.295	0.767	1.147	2.235	0	0.0066	0	0	5.0142	3.3678	2.065
Pyrimidine	N	Test Set	0.61	1	0	0.65	0.634	0	0		1	25.78	22.032	-3.843	0.801	0	0	1.0009	0	0.604	0.405	1.009	1.332	2.497	0	0.0945	0	0	7.0476	4.4084	2.428
Quinoxaline	N	Test Set	1.3	1.2	0	0.59	1.003	0	0		2	25.78	39.538	-5.75	1.302	0	0	1.5743	0	0.615	0.319	0.836	1.015	1.855	0	0.0345	0	0	5.8626	3.4692	1.755
r-Butyrolactone	N	Test Set	0.37	1.74	0	0.45	0.638	0	0		1	26.3	20.513	-3.813	0.861	0	0	1.0384	0	0.646	0.403	0.772	0.844	1.25	0	0.0017	0	0	6.3183	2.6613	0.679
Resorcinol	N	Test Set	0.98	1	1.1	0.58	0.834	0	0		1	40.46	30.488	-4.793	1.101	2	0	1.3183	0	0.988	-0.475	1.826	-1.888	4.816	-0.1033	10.4296	7.2595	4.4785	3.3383	1.2484	0.196
Succinicacid	N	Test Set	0.37	1.32	1.03	0.71	0.821	0	0		0	80.26	21.001	-4.118	1.181	2	0	1.3323	0	1.451	-0.321	2.862	-2.149	7.824	-0.1232	12.4418	8.9639	5.9843	8.7342	3.1322	0.605
t-Butylamine	N	Test Set	0.12	0.29	0.16	0.71	0.772	0	0		0	27.64	25.345	-4.481	0.731	0	2	1.1948	0	0.469	0.5	1.334	2.654	6.211	-0.002	0.3269	0.0224	0	6.6024	5.1315	3.854
Teflurane	N	Test Set	-0.07	0.21	0.2	0.02	0.636	0	0		0	0	16.766	-4.226	1.365	0	0	1.1474	0	0.264	-0.246	0.352	-0.471	0.654	-0.0302	3.0203	1.5585	0.4313	0	0	0
tert-Butylbenzene	N	Test Set	0.62	0.49	0	0.16	1.28	0	0		1	0	45.712	-7.139	1.342	0	0	1.9647	0	0.299	0.02	0.091	0.013	0.034	0	0	0	0	0	0	0
Tetradecan- 1-ol	N	Test Set	0.16	0.42	0.37	0.48	2.14	0	0		0	20.23	70.574	-11.931	2.144	1	0	3.3224	0	0.602	0.221	1.08	0.658	2.741	-0.0311	3.1227	1.7916	0.7972	6.1264	3.925	2.084
Tetrahydropyran	N	Test Set	0.28	0.47	0	0.55	0.829	0	0		1	9.23	25.12	-4.545	0.861	0	0	1.1876	0	0.327	0.333	0.559	0.853	1.372	0	0	0	0	4.7742	2.9207	1.451
Thiophene	N	Test Set	0.69	0.56	0	0.15	0.641	0	0		1	28.24	24.319	-4.821	0.841	0	0	1.031	0	0.303	-0.051	0.146	-0.051	0.088	-0.0001	0.1336	0.0002	0	0	0	0
Thiophenol	N	Test Set	1	0.8	0.09	0.16	0.88	0	0		1	38.8	33.694	-6.089	1.102	0	0	1.3914	0	0.437	-0.074	0.254	-0.097	0.21	-0.0063	0.7396	0.1293	0.0009	0.0784	0.0012	0
Toluene	N	Test Set	0.6	0.52	0	0.14	0.857	0	0		1	0	31.408	-5.421	0.921	0	0	1.3196	0	0.276	0.013	0.09	0.009	0.034	0	0	0	0	0	0	0
trans-1,2-Dimethylcyclohexane	N	Test Set	0.19	0.1	0	0	1.127	0	0		1	0	38.456	-6.189	1.122	0	0	1.7212	0	0.085	0.004	0.008	0.001	0.001	0	0	0	0	0	0	0
trans-But-2-en-1 -a1	N	Test Set	0.39	0.8	0	0.5	0.645	0	0		0	17.07	21.068	-4.142	0.701	0	0	1.0171	0	0.508	0.35	0.671	0.81	1.242	0	0.0017	0	0	5.6579	2.7638	0.94
Trichloroethene	N	Test Set	0.52	0.37	0.08	0.03	0.715	0	0		0	0	25.642	-6.248	1.314	0	0	1.2025	0	0.183	-0.098	0.126	-0.13	0.15	-0.0083	0.9133	0.1971	0.0054	0	0	0
Triethyl phosphate	N	Test Set	0	1	0	1.06	1.393	0	0		0	54.57	42.875	-7.502	1.822	0	0	2.2239	0	0.805	0.608	1.052	1.347	2.019	0	0	0	0	8.6944	4.4269	1.701
Triethylamine	N	Test Set	0.1	0.15	0	0.79	1.054	0	0		0	4.44	35.11	-6.077	1.012	0	0	1.6266	0	0.24	0.251	0.507	0.967	1.935	0	0	0	0	3.1449	2.3475	1.646
Tri-n-butyl phosphate	N	Test Set	-0.1	0.9	0	1.21	2.239	0	0		0	54.57	71.717	-11.597	2.663	0	0	3.5629	0	0.754	0.604	1.004	1.363	2.057	0	0	0	0	8.685	4.6782	1.869
Vinyl acetate	N	Test Set	0.22	0.64	0	0.43	0.704	0	0		0	26.3	22.153	-4.438	0.861	0	0	1.1273	0	0.499	0.168	0.423	0.313	0.503	0	0.0145	0	0	2.5295	0.7786	0.102
Water	N	Test Set	0	0.45	0.82	0.35	0.167	0	0		0	9.23	3.048	-1.142	0.18	1	0	0.256	0	0.75	0.127	1.803	0.716	4.877	-0.0682	6.8534	3.8637	1.6418	8.3739	5.7053	3.396
Xanthene	N	Test Set	1.5	1.07	0	0.23	1.4152	0	0		3	9.23	55.969	-8.085	1.822	0	0	2.211	0	0.5	-0.002	0.204	0.02	0.115	0	0.0035	0	0	0.2582	0.0321	0

## Sheet: Training Set
Table S2 Subparameters of training set. Type A=monovalent anion, C=monovalent cation, DA=divalent anion, N=neutral compounds
	Type		LFER descriptors								Sub-parameters
Chemical			E	S	A	B	V	J+	J-		No. Ring	PSA	MR	Evdw	MW/100	NOH	NHN	Cosmo-Vol./100	Sig1/100	Sig2/100	Sig3/100	sig4/100	Sig5/100	Sig6/100	HBD1	HBD2	HBD3	HBD4	HA2	HA3	HBA4
2,3-Dibromopropanoate-	A	Training Set	0.87	3.49	0	2.29	0.9342	0	1.582		0	40.13	32.105	-6.493	2.309	0	0	1.5325	1	1.801	2.854	5.557	10.651	21.365	0	0.0533	0	0	35.3749	26.9523	18.843
2,4,6-TrinitroPX-	A	Training Set	1.58	7.75	0	1.76	1.2762	0	2.63		1	166.05	47.668	-5.127	2.281	0	0	2.1256	1	1.47	1.395	1.904	2.285	3.224	-0.0003	0.1348	0.0009	0	13.9717	6.2182	2.109
2,4-DimethylPX-	A	Training Set	0.99	2.8	0	2.26	1.0354	0	1.7		1	17.07	37.708	-6.01	1.212	0	0	1.6226	1	1.701	3.175	6.823	15.479	36.244	0	0	0	0	31.8221	24.2593	18.969
2,5-DichloroPX-	A	Training Set	1.11	4.45	0	2.42	0.9984	0	2.636		1	17.07	36.629	-6.923	1.62	0	0	1.6459	1	1.386	2.083	4.005	8.014	16.738	0	0.0004	0	0	22.0072	17.2854	12.958
2,5-DinitroPX-	A	Training Set	1.41	5.03	0	2.24	1.102	0	2.104		1	116.39	41.143	-4.943	1.831	0	0	1.8098	1	1.504	1.853	2.987	4.722	8.134	0	0.008	0	0	22.1278	13.5254	7.649
2,6-Dibromobenzoate-	A	Training Set	1.54	4.97	0	3.07	1.2602	0	2.712		1	40.13	46.859	-8.008	2.789	0	0	2.0337	1	1.822	2.845	5.595	10.707	21.403	0	0.0346	0	0	36.0617	27.5614	19.301
2,6-Dichlorobenzoate-	A	Training Set	1.1	4.77	0	2.95	1.155	0	2.624		1	40.13	41.479	-7.131	1.9	0	0	1.9077	1	1.795	2.821	5.52	10.533	21.006	0	0.0383	0	0	35.8953	27.2302	18.851
2,6-Difluorobenzoate-	A	Training Set	0.84	3.87	0	2.92	0.9456	0	2.468		1	40.13	31.375	-5.103	1.571	0	0	1.6255	1	1.784	2.803	5.453	10.398	20.76	0	0.0368	0	0	35.6053	26.6744	18.263
2,6-Diisopropoxybenzoate-	A	Training Set	0.99	4.3	0	3.65	1.873	0	2.418		1	58.59	63.671	-9.188	2.373	0	0	2.9707	1	2.374	4.127	8.613	18.127	39.534	0	0.001	0	0	48.3979	37.7079	27.773
2,6-Dimethylbenzoate-	A	Training Set	0.88	3.08	0	2.97	1.192	0	2.259		1	40.13	41.391	-6.281	1.492	0	0	1.8911	1	1.982	3.549	7.314	15.441	33.671	0	0	0	0	41.0099	32.144	23.651
2,6-Dinitrobenzoate-	A	Training Set	1.4	5.8	0	3.04	1.2586	0	2.566		1	139.45	45.942	-5.272	2.111	0	0	2.0761	1	2.012	2.564	4.757	7.94	14.827	-0.001	0.3846	0.0062	0	32.9006	22.8315	14.484
2,6-Dipropoxybenzoate-	A	Training Set	1.01	4.12	0	3.52	1.873	0	2.349		1	58.59	63.671	-9.492	2.373	0	0	2.9647	1	2.478	4.262	8.844	18.428	39.733	0	0	0	0	50.3802	39.1371	28.709
2-Aminobenzoate-	A	Training Set	1.23	3.89	0.05	2.78	1.01	0	2.146		1	66.15	35.863	-5.226	1.361	0	2	1.5676	1	2.007	3.156	6.664	13.314	29.105	-0.0107	1.1474	0.4077	0.0743	37.3393	28.7511	20.857
2-Chloro-4-bromoPX-	A	Training Set	1.3	5.27	0	2.6	1.051	0	2.968		1	17.07	40.76	-7.367	2.065	0	0	1.7029	1	1.425	2.199	4.341	8.894	18.991	0	0.0043	0	0	23.0378	18.2399	13.874
2-Chlorobenzoate-	A	Training Set	0.99	3.5	0	2.77	1.0326	0	2.16		1	40.13	36.469	-6.152	1.556	0	0	1.6501	1	1.857	3.223	6.711	14.088	30.71	0	0.0017	0	0	37.7009	29.5467	21.932
2-CHO-benzoate-	A	Training Set	1.16	3.96	0	2.75	1.0668	0	2.18		1	57.2	36.847	-5.48	1.491	0	0	1.6866	1	1.872	2.931	5.513	10.384	20.449	0	0.0001	0	0	37.4424	26.7526	17.469
2-CyanoPX-	A	Training Set	1.07	5.5	0	2.32	0.9083	0	2.338		1	40.86	32.65	-5.034	1.181	0	0	1.4505	1	1.558	2.326	4.191	7.816	15.282	0	0	0	0	27.0081	18.9978	12.809
2-FluoroPX-	A	Training Set	0.81	3.9	0	2.28	0.7713	0	2.23		1	17.07	27.088	-4.657	1.111	0	0	1.2772	1	1.62	2.78	5.657	12.108	26.845	0	0	0	0	28.1805	21.8746	17.019
2-MeCObenzoate-	A	Training Set	1.09	3.92	0	3.16	1.2077	0	2.082		1	57.2	41.654	-6.13	1.632	0	0	1.9202	1	1.976	3.128	5.987	11.46	22.912	0	0.0001	0	0	39.9868	29.0397	19.093
2-MethylPX-	A	Training Set	0.99	2.75	0	2.18	0.8945	0	1.65		1	17.07	31.844	-5.297	1.071	0	0	1.4013	1	1.672	3.039	6.369	14.126	32.432	0	0	0	0	30.8145	23.1497	17.916
2-NitroPX-	A	Training Set	1.17	2.95	0	2.2	0.9278	0	1.72		1	66.73	34.619	-4.782	1.381	0	0	1.4926	1	1.568	2.29	3.963	7.046	13.135	0	0	0	0	28.3796	18.9717	11.779
3,4-DichloroPX-	A	Training Set	1.17	4.02	0	2.37	0.9984	0	2.657		1	17.07	37.686	-6.779	1.62	0	0	1.6368	1	1.438	2.356	4.747	9.964	21.582	0	0	0	0	24.6484	19.8957	15.407
3,4-DimethylPX-	A	Training Set	0.98	2.71	0	2.24	1.0354	0	1.7		1	17.07	37.708	-5.918	1.212	0	0	1.6246	1	1.821	3.484	7.616	17.477	41.328	0	0	0	0	35.0821	26.8946	21.129
3,5-DichloroPX-	A	Training Set	1.17	5.3	0	2.44	0.9984	0	3.03		1	17.07	36.629	-6.925	1.62	0	0	1.6466	1	1.375	2.151	4.226	8.615	18.196	0	0.0039	0	0	23.066	18.4583	14.027
3,5-DimethylPX-	A	Training Set	0.98	2.71	0	2.24	1.0354	0	1.7		1	17.07	36.651	-6.001	1.212	0	0	1.6269	1	1.81	3.407	7.331	16.578	38.694	0	0	0	0	34.8525	26.4105	20.497
3,5-DinitroPX-	A	Training Set	1.47	6.05	0	2.12	1.102	0	2.96		1	116.39	40.086	-4.943	1.831	0	0	1.8177	1	1.525	2.072	3.753	6.875	13.519	0	0.0041	0	0	22.615	16.2361	11.415
3-Aminobenzoate-	A	Training Set	1.23	4	0.11	2.99	1.01	0	2.121		1	66.15	35.863	-5.332	1.361	0	2	1.5964	1	2.343	3.611	8.253	16.542	37.738	-0.0245	2.6287	0.9461	0.1868	43.6462	34.4093	25.661
3-BromoPX-	A	Training Set	1.21	4	0	2.44	0.9286	0	2.43		1	17.07	34.907	-6.256	1.72	0	0	1.4856	1	1.536	2.538	5.09	10.708	23.309	0	0	0	0	25.8646	20.5858	16.049
3-ChloroPX-	A	Training Set	1.06	3.24	0	2.27	0.876	0	2.15		1	17.07	31.833	-5.776	1.276	0	0	1.4213	1	1.548	2.602	5.266	11.18	24.542	0	0	0	0	26.4103	21.0201	16.462
3-Cyanobenzoate-	A	Training Set	1.01	3.7	0	2.82	1.0649	0	2.192		1	63.92	36.174	-5.578	1.461	0	0	1.7022	1	1.971	3.24	6.522	12.993	27.22	0	0.0488	0	0	39.5685	29.673	20.975
3-EthylPX-	A	Training Set	0.96	2.99	0	2.28	1.0354	0	1.693		1	17.07	36.651	-5.991	1.212	0	0	1.6327	1	1.781	3.34	7.163	16.172	37.691	0	0	0	0	33.8627	25.7249	20.116
3-FluoroPX-	A	Training Set	0.82	2.31	0	2.07	0.7713	0	1.582		1	17.07	27.088	-4.636	1.111	0	0	1.2775	1	1.601	2.761	5.674	12.247	27.347	0	0	0	0	27.6866	21.9292	17.295
3-Iodobenzoate-	A	Training Set	1.46	3.31	0	2.57	1.1684	0	2.082		1	40.13	44.176	-7.368	2.47	0	0	1.8381	1	1.841	3.126	6.427	13.178	28.02	0	0.0056	0	0	37.8059	29.5872	21.593
3-MeCObenzoate-	A	Training Set	1.09	3.66	0	3.04	1.2077	0	2.201		1	57.2	41.654	-6.275	1.632	0	0	1.9154	1	2.133	3.565	7.275	14.816	31.617	0	0.0058	0	0	43.5687	32.7204	23.122
3-MethoxyPX-	A	Training Set	1.03	3.07	0	2.22	0.9532	0	1.604		1	26.3	32.929	-5.498	1.231	0	0	1.515	1	1.901	3.326	6.942	15.179	34.572	0	0	0	0	34.46	25.5595	19.501
3-MethylPX-	A	Training Set	0.97	2.8	0	2.1	0.8945	0	1.656		1	17.07	31.844	-5.305	1.071	0	0	1.4081	1	1.775	3.299	7.019	15.711	36.314	0	0	0	0	33.5925	25.4497	19.875
3-Nitro-4-chlorobenzoate-	A	Training Set	1.4	3.97	0	2.6	1.2068	0	2.119		1	89.79	43.711	-6.318	2.006	0	0	1.9721	1	1.898	2.97	5.934	11.579	23.98	-0.0001	0.0887	0.0002	0	36.0951	27.2651	19.28
3-NitroPX-	A	Training Set	1.2	3.8	0	2.25	0.9278	0	2.06		1	66.73	33.562	-4.764	1.381	0	0	1.5025	1	1.604	2.547	4.984	10.172	21.683	0	0	0	0	26.8442	20.4276	15.295
3-SH-benzoate-	A	Training Set	1.37	3.36	0.01	2.77	1.0737	0	2.227		1	78.93	38.711	-6.485	1.532	0	0	1.7336	1	2.035	3.308	7.094	14.538	31.912	-0.0056	0.6685	0.1104	0.0005	39.408	31.0326	23.002
3-Trifluoromethylbenzoate-	A	Training Set	0.45	2.99	0	2.52	1.1042	0	2.119		1	40.13	36.461	-5.811	1.891	0	0	1.887	1	1.786	3.091	6.391	13.145	28.03	0	0.0328	0	0	37.6503	29.4445	21.465
4-AcetylPX-	A	Training Set	1.16	5.7	0	2.38	1.0511	0	2.14		1	34.14	37.908	-5.754	1.351	0	0	1.6612	1	1.721	2.725	5.067	9.678	19.159	0	0	0	0	32.5276	24.2037	16.579
4-Bromobenzoate-	A	Training Set	1.15	3.25	0	2.6	1.0825	0	2.148		1	40.13	39.159	-6.758	2	0	0	1.7341	1	1.879	3.275	6.863	14.377	31.292	0	0.0152	0	0	39.0026	30.7459	22.724
4-Chlorobenzoate-	A	Training Set	0.99	3.37	0	2.6	1.0326	0	2.176		1	40.13	36.469	-6.277	1.556	0	0	1.669	1	1.875	3.293	6.908	14.492	31.573	0	0.0186	0	0	39.1816	30.9116	22.878
4-CHO-benzoate-	A	Training Set	1.16	3.64	0	2.83	1.0668	0	2.05		1	57.2	36.847	-5.63	1.491	0	0	1.7094	1	2.018	3.366	6.73	13.47	28.144	0	0.0018	0	0	41.4702	30.8889	21.625
4-Cyanobenzoate-	A	Training Set	1.01	3.96	0	2.78	1.0649	0	2.248		1	63.92	36.174	-5.565	1.461	0	0	1.6997	1	1.976	3.228	6.51	12.941	27.123	0	0.0708	0	0	39.5211	29.622	20.911
4-EthylPX-	A	Training Set	0.95	2.84	0	2.27	1.0354	0	1.66		1	17.07	37.708	-6.003	1.212	0	0	1.637	1	1.778	3.367	7.287	16.593	38.958	0	0	0	0	33.7712	25.9123	20.445
4-FluoroPX-	A	Training Set	0.82	1.81	0	2.06	0.7713	0	1.357		1	17.07	27.088	-4.635	1.111	0	0	1.2756	1	1.686	3.045	6.561	14.76	34.266	0	0	0	0	29.7697	23.9855	19.288
4-Iodobenzoate-	A	Training Set	1.46	3.29	0	2.61	1.1684	0	2.059		1	40.13	44.176	-7.377	2.47	0	0	1.84	1	1.891	3.266	6.853	14.338	31.187	0	0.0069	0	0	38.9733	30.7211	22.701
4-MeCObenzoate-	A	Training Set	1.09	3.99	0	3.02	1.2077	0	2.28		1	57.2	41.654	-6.27	1.632	0	0	1.9145	1	2.102	3.484	7.024	14.118	29.654	0	0	0	0	42.886	32.08	22.529
4-MethoxyPX-	A	Training Set	1.05	3.05	0	2.26	0.9532	0	1.493		1	26.3	33.986	-5.536	1.231	0	0	1.5393	1	1.898	3.432	7.275	16.124	37.048	0	0	0	0	35.4948	27.158	20.877
4-MethylPX-	A	Training Set	0.97	2.75	0	2.1	0.8945	0	1.61		1	17.07	32.901	-5.305	1.071	0	0	1.41	1	1.781	3.377	7.315	16.658	39.111	0	0	0	0	33.8075	25.9793	20.525
4-NHCOMe-benzoate-	A	Training Set	1.27	3.68	0.24	3.35	1.3075	0	2.244		1	69.23	45.772	-6.63	1.782	0	1	2.0633	1	2.496	3.799	8.467	16.365	36.658	-0.0246	2.4935	1.4295	0.618	48.6938	36.9526	26.137
4-NitroPX-	A	Training Set	1.22	4.85	0	2.09	0.9278	0	2.2		1	66.73	34.619	-4.742	1.381	0	0	1.4972	1	1.512	2.131	3.568	6.099	10.952	0	0	0	0	26.7213	17.2293	10.273
4-tert-ButylPX-	A	Training Set	0.96	3.22	0	2.3	1.3172	0	1.9		1	17.07	47.062	-7.037	1.492	0	0	2.0588	1	1.805	3.394	7.373	16.835	39.624	0	0	0	0	34.0546	26.1594	20.632
4-TrifluoromethylPX-	A	Training Set	0.57	3.61	0	2.23	0.9476	0	1.95		1	17.07	33.092	-5.29	1.611	0	0	1.6342	1	1.435	2.333	4.672	9.754	21.044	0	0	0	0	24.4874	19.5945	15.124
Aspirin-	A	Training Set	1	4.15	0	3.28	1.2664	0	2.256		1	60.44	44	-6.372	1.792	0	0	1.9928	1	1.575	1.987	3.118	4.891	8.134	0	0	0	0	25.5537	15.3977	7.545
Benzoate-	A	Training Set	0.88	3.64	0	2.88	0.9102	0	2.395		1	40.13	31.459	-5.114	1.211	0	0	1.4414	1	1.939	3.508	7.345	15.642	34.388	0	0	0	0	40.5843	32.2642	24.191
Br-	A	Training Set	0.17	2.74	0	1.82	0.307	0	1.567		0	0	10.039	-3.223	0.799	0	0	0.4221	1	1.707	2.912	4.97	8.481	14.474	0	0	0	0	41.4016	29.6819	17.962
carvacrol-	A	Training Set	0.97	3.36	0	2.4	1.3172	0	1.802		1	17.07	46.265	-7.291	1.492	0	0	2.0701	1	1.72	3.167	6.752	15.198	35.338	0	0	0	0	32.0924	24.2788	18.876
Cl-	A	Training Set	0.1	3.52	0	2.32	0.228	0	2.363		0	0	6.965	-2.629	0.355	0	0	0.3609	1	1.895	3.59	6.801	12.885	24.411	0	0	0	0	47.2182	36.6618	26.106
ClO4-	A	Training Set	-0.16	5.14	0	0.99	0.493	0	1.29		0	47.92	16.932	-1.944	0.995	0	0	0.7716	1	1.13	1.31	1.545	1.847	2.23	0	0	0	0	13.8257	3.8899	0.277
Cyanoacetate-	A	Training Set	0.53	3.32	0	2.78	0.598	0	1.947		0	63.92	16.113	-3.105	0.841	0	0	0.9834	1	1.946	3.146	5.997	11.269	22.26	0	0.083	0	0	39.911	28.822	19.365
Diclofenac-	A	Training Set	1.96	5.31	0.03	3.35	2.0035	0	2.624		2	52.16	75.608	-10.857	2.951	0	1	3.2218	1	1.888	2.727	5.557	11.05	23.325	0	0.0295	0	0	32.2781	24.8827	17.911
Eugenol-	A	Training Set	1.1	3.11	0	2.32	1.3329	0	1.393		1	26.3	47.933	-7.288	1.632	0	0	2.1275	1	1.824	3.125	6.465	14.105	32.125	0	0	0	0	32.3909	24.3427	18.344
Furosemide-	A	Training Set	2.46	6.08	0.19	4.19	2.0817	0	2.718		2	116.62	81.763	-11.455	3.258	0	3	3.6069	1	2.793	3.275	7.736	13.484	29.957	-0.037	4.0504	1.5801	0.4823	44.6391	32.8152	22.772
Iburofen-	A	Training Set	0.88	3.5	0	3.31	1.7556	0	2.404		1	40.13	60.239	-8.984	2.053	0	0	2.7818	1	2.064	3.744	7.89	16.982	37.591	0	0	0	0	42.4865	34.002	25.802
Isophthalicacid-	A	Training Set	1.25	4.03	0.26	2.95	1.1255	0	2.285		1	80.26	36.476	-5.685	1.651	1	0	1.8082	1	2.296	3.086	7.675	12.688	31.904	-0.0551	5.5124	3.8979	2.5047	41.9945	31.3357	22.131
Ketoprofen-	A	Training Set	1.8	5.49	0	3.39	1.9564	0	2.485		2	57.2	70.726	-9.839	2.533	0	0	3.0763	1	2.33	3.691	7.722	15.838	34.189	0	0.0012	0	0	44.6424	33.8721	24.388
Mefenamic acid-	A	Training Set	1.8	4.71	0.09	3.14	1.8996	0	2.643		2	52.16	70.935	-9.669	2.403	0	1	2.9218	1	1.833	2.737	5.385	10.828	22.839	0	0	0	0	31.1082	23.8205	17.061
Monomethylsucinate-	A	Training Set	0.43	2.26	0	3.2	0.9404	0	1.882		0	66.43	27.264	-4.802	1.311	0	0	1.5373	1	2.276	4.093	8.477	17.84	39.04	0	0	0	0	48.6813	36.6984	26.261
Naproxen-	A	Training Set	1.66	5.07	0.02	3.11	1.7606	0	2.426		2	26.3	64.85	-9.07	2.293	0	0	2.7836	1	2.276	3.714	7.896	16.64	36.654	0	0.0047	0	0	43.0444	33.8024	25.307
NO3-	A	Training Set	0.17	1.98	0	1.97	0.32	0	1.703		0	69.89	9.368	-1.439	0.62	0	0	0.5673	1	1.483	2.27	3.578	5.768	9.487	0	0	0	0	30.9979	18.9928	9.62
Pentanoate-	A	Training Set	0.36	2.15	0	3.04	0.866	0	2.082		0	40.13	25.979	-4.848	1.011	0	0	1.3754	1	2.038	4.228	9.28	20.875	48.014	0	0	0	0	47.2992	38.2704	29.626
Phenobarbital-	A	Training Set	1.78	4.9	0.07	3.77	1.6784	0	2.488		2	78.43	55.548	-7.826	2.332	0	2	2.68	1	2.45	3.576	8.207	16.111	37.239	-0.0242	2.4516	1.458	0.6551	39.6432	27.071	23.584
Phenylacetate-	A	Training Set	0.88	3.27	0	2.96	1.0511	0	2.153		1	40.13	36.045	-5.794	1.351	0	0	1.65	1	2	3.625	7.682	16.61	37.098	0	0	0	0	40.9497	32.6557	24.668
Pidotimod-	A	Training Set	1.81	5.21	0.09	4.06	1.6069	0	2.397		2	114.84	49.838	-7.736	2.433	0	1	2.6419	1	2.794	3.726	7.997	13.833	29.438	-0.0309	3.2425	1.7599	0.7519	51.4059	36.453	23.491
Propanoate-	A	Training Set	0.38	1.69	0	2.91	0.5842	0	1.822		0	40.13	16.365	-3.369	0.731	0	0	0.9364	1	2.019	4.22	9.252	20.774	47.641	0	0	0	0	47.2752	38.2754	29.652
Succinicacid-	A	Training Set	0.52	1.03	0	2.35	0.7995	0	0.783		0	80.26	21.001	-3.97	1.171	1	0	1.3138	1	2.511	3.866	9.448	17.518	43.177	-0.0511	5.1079	3.5343	2.2022	49.2735	37.5155	27.479
2,3-DimethylPy+	C	Training Set	0.51	2.29	1.16	0	0.9786	1.1	0		1	15.79	35.132	-5.804	1.082	0	1	1.4956	-1	0.975	-1.238	1.897	-3.277	6.074	-0.095	9.942	6.721	4.717	0	0	0
2,6-DimethylPy+	C	Training Set	0.46	1.9	1.04	0	0.9786	1.11	0		1	15.79	35.132	-5.915	1.082	0	1	1.5041	-1	0.912	-1.061	1.508	-2.476	4.445	-0.071	7.689	5.266	3.761	0	0	0
2-Aminoethanol+	C	Training Set	0.31	2.96	1.76	0	0.5704	0.997	0		0	47.87	16.855	-3.464	0.621	0	3	0.8804	-1	2.089	-3.164	6.962	-12.498	26.978	-0.3065	30.8864	23.7941	17.3526	3.3895	1.8217	0.706
2-Chloroaniline+	C	Training Set	0.88	1.7	1.93	0	0.9605	0.73	0		1	3.24	36.819	-6.149	1.286	0	3	1.4948	-1	1.797	-3.503	7.432	-16.245	36.072	-0.2718	27.4149	22.2904	17.6406	0	0	0
2-MethylPy+	C	Training Set	0.45	2	1.09	0	0.8377	1.11	0		1	15.79	30.166	-5.201	0.941	0	1	1.2871	-1	1.032	-1.341	2.062	-3.56	6.61	-0.101	10.735	7.058	4.958	0	0	0
3,4-DimethylPy+	C	Training Set	0.53	3.05	1.7	0	0.9786	0.93	0		1	15.79	35.132	-5.776	1.082	0	1	1.4975	-1	1.028	-1.386	2.22	-3.934	7.394	-0.117	11.92	8.06	5.591	0	0	0
3-AminoPy+	C	Training Set	0.83	4.5	2.97	0	0.7966	0.34	0		1	41.81	29.604	-4.707	0.951	0	3	1.2236	-1	1.292	-1.849	2.963	-5.027	8.959	-0.191	19.514	12.471	7.517	0	0	0
3-BromoPy+	C	Training Set	0.76	3.2	2.08	0	0.8718	0.67	0		1	15.79	32.9	-6.114	1.59	0	1	1.3577	-1	1.284	-1.891	3.211	-5.936	11.623	-0.163	16.488	10.88	7.241	0	0	0
3-ChloroPy+	C	Training Set	0.58	1.87	1.25	0	0.8192	0.96	0		1	15.79	30.21	-5.633	1.146	0	1	1.2931	-1	1.282	-1.903	3.242	-6.008	11.787	-0.164	16.59	10.92	7.265	0	0	0
3-Hydroxyaniline+	C	Training Set	0.98	2.62	2.96	0	0.8964	0.528	0		1	23.47	33.832	-5.153	1.101	1	3	1.3887	-1	2.129	-3.682	7.775	-15.713	33.522	-0.3367	33.903	26.5859	20.0646	0.9505	0.2277	0.009
3-MethylPy+	C	Training Set	0.48	2.29	1.29	0	0.8377	0.988	0		1	15.79	30.166	-5.173	0.941	0	1	1.284	-1	1.087	-1.506	2.438	-4.353	8.25	-0.125	12.934	8.558	5.93	0	0	0
4-AminoPy+	C	Training Set	0.83	2.8	1.44	0	0.7966	0.72	0		1	41.81	29.604	-4.688	0.951	0	1	1.2194	-1	1.269	-1.8	2.791	-4.565	7.775	-0.191	19.477	12.302	7.261	0	0	0
4-Chloroaniline+	C	Training Set	0.91	1.9	2.4	0	0.9605	0.633	0		1	3.24	36.819	-6.275	1.286	0	3	1.5071	-1	1.903	-3.572	7.367	-15.587	33.572	-0.2875	29.2026	23.087	17.9178	0	0	0
4-Hydroxyaniline+	C	Training Set	1	2.92	2.7	0	0.8964	0.864	0		1	23.47	33.832	-5.131	1.101	1	3	1.3829	-1	2.115	-3.589	7.526	-14.983	31.713	-0.3317	33.4363	26.0737	19.5294	1.0815	0.2928	0.019
4-MethylPy+	C	Training Set	0.48	2.28	1.15	0	0.8377	1.008	0		1	15.79	30.166	-5.161	0.941	0	1	1.2829	-1	1.087	-1.495	2.39	-4.209	7.868	-0.125	12.821	8.42	5.76	0	0	0
4-Pyridinecarboxaldehyde+	C	Training Set	0.65	2.97	1.6	0	0.8534	1.18	0		1	32.86	30.587	-5.006	1.081	0	1	1.3378	-1	1.534	-1.872	3.477	-5.923	11.972	-0.1624	16.5683	10.7142	7.1358	0.8691	0.1752	0.014
Abuterol+	C	Training Set	1.23	5.87	3.02	0	2.0001	2.155	0		1	77.3	73.66	-10.134	2.544	3	2	3.372	-1	2.141	-1.56	4.551	-5.227	14.268	-0.2173	22.171	15.2515	9.921	8.0454	4.1757	1.65
Amitriptyline+	C	Training Set	1.77	3.72	1.63	0	2.4211	2.491	0		3	4.44	92.22	-12.128	2.784	0	1	3.7403	-1	1.489	-1.488	2.518	-4.359	8.548	-0.1059	11.56	7.8612	5.8584	0	0	0
Aniline+	C	Training Set	0.81	1.62	1.93	0	0.8377	0.62	0		1	3.24	31.809	-5.129	0.941	0	3	1.2817	-1	1.792	-3.347	6.83	-14.318	30.468	-0.2759	27.7788	22.2626	17.2308	0	0	0
Astemizole+	C	Training Set	2.95	6.52	3.39	0	3.5779	3.488	0		5	51.11	140.226	-17.447	4.596	0	2	5.7223	-1	2.149	-1.065	2.873	-2.393	7.507	-0.093	10.3305	6.1929	4.2036	4.9616	2.6894	1.297
Bupivacaine+	C	Training Set	1.17	4.67	2.92	0	2.5354	1.592	0		2	47.53	89.436	-12.329	2.894	0	2	3.9181	-1	1.421	-1.734	3.97	-7.872	19.798	-0.1425	14.5097	10.9127	8.2925	1.6871	1.1306	0.646
Butylamine+	C	Training Set	0.07	1.93	1.18	0	0.7935	0.817	0		0	27.64	25.307	-4.856	0.742	0	3	1.2058	-1	1.55	-2.766	5.293	-10.385	20.63	-0.2459	24.6568	19.3383	14.2747	0	0	0
Citalopram+	C	Training Set	1.68	5.11	2.58	0	2.5543	2.416	0		3	37.46	92.577	-12.528	3.254	0	1	4.0646	-1	1.902	-1.262	2.95	-3.468	8.369	-0.0992	11.2713	7.0405	5.1329	4.1238	1.5729	0.364
Dimethylamine+	C	Training Set	0.04	2.41	1	0	0.5117	0.877	0		0	16.61	15.787	-3.544	0.461	0	2	0.7836	-1	1.359	-2.228	4.079	-7.922	15.876	-0.1876	19.1789	14.7753	11.0689	0	0	0
Dipropylamine+	C	Training Set	-0.03	2.27	1	0	1.0753	0.91	0		0	16.61	35.015	-6.443	1.022	0	2	1.6436	-1	1.168	-1.769	3.136	-5.964	11.741	-0.1527	15.4981	11.8477	8.6339	0	0	0
Doxepin+	C	Training Set	1.8	4.07	1.96	0	2.3389	2.452	0		3	4.44	92.22	-12.222	2.784	0	1	3.7373	-1	1.457	-1.405	2.33	-3.921	7.571	-0.0969	10.6042	6.9177	5.0573	0	0	0
Ethylamine+	C	Training Set	0.09	2.84	1.3	0	0.5117	0.781	0		0	27.64	15.693	-3.369	0.461	0	3	0.768	-1	1.555	-2.783	5.294	-10.35	20.509	-0.2464	24.7017	19.3649	14.2842	0	0	0
Fluoxetine+	C	Training Set	1.08	3.57	2.1	0	2.2618	1.608	0		2	25.84	80.903	-11.676	3.103	0	2	3.6335	-1	1.984	-2.587	4.893	-9.311	19.187	-0.2082	21.6231	15.5676	11.6462	0.258	0.0455	0
Fluphenazine+	C	Training Set	2.01	6	2.85	0	3.1122	2.902	0		4	66.44	107.973	-15.699	4.385	1	1	4.997	-1	1.975	-0.854	3.858	-2.037	12.172	-0.1347	14.114	8.2508	4.928	10.7444	7.0454	3.998
Imidazole+	C	Training Set	0.56	2.5	1.61	0	0.5578	1.05	0		1	20.72	24.452	-4.57	0.831	0	1	1.1087	-1	1.133	-1.533	2.364	-3.986	7.146	-0.1328	13.6275	8.5759	5.3548	0	0	0
Metoprolol+	C	Training Set	1.02	5.35	2.16	0	2.2819	2.348	0		1	55.3	77.855	-12.214	2.684	1	2	3.6011	-1	1.796	-1.284	3.256	-3.918	10.162	-0.1346	14.1045	9.3807	6.3024	4.8518	2.5194	1.025
NBu4+	C	Training Set	-0.1	2.82	0.61	0	2.4843	1.418	0		0	0	81.4	-12.78	2.425	0	0	3.8316	-1	0.664	-0.434	0.347	-0.293	0.263	-0.0023	0.9314	0.0088	0	0	0	0
Nefopam+	C	Training Set	1.45	4.16	2.35	0	2.1001	1.958	0		3	13.67	75.697	-10.728	2.544	0	1	3.2896	-1	1.467	-1.349	2.398	-3.718	7.75	-0.0974	10.5868	7.1641	5.2615	1.215	0.547	0.142
NMe4+	C	Training Set	-0.1	1.31	0.68	0	0.7635	1.235	0		0	0	23.716	-4.807	0.742	0	0	1.2273	-1	0.851	-0.769	0.725	-0.706	0.705	-0.0186	3.1592	0.3535	0.0125	0	0	0
NPr4+	C	Training Set	-0.1	2.02	0.42	0	1.9207	1.552	0		0	0	62.172	-9.814	1.864	0	0	2.9601	-1	0.654	-0.458	0.363	-0.306	0.272	-0.0026	0.949	0.011	0	0	0	0
Penbutolol+	C	Training Set	0.78	4.66	1.98	0	2.6195	1.963	0		2	46.07	89.115	-12.93	2.924	1	2	3.9938	-1	1.542	-1.478	2.708	-4.312	8.546	-0.1373	14.1532	9.4262	6.2006	0.736	0.3013	0.077
Pergolide+	C	Training Set	2.07	4.53	2.38	0	2.5669	2.58	0		4	55.76	94.329	-13.351	3.155	0	2	3.9932	-1	1.844	-2.139	5.526	-9.347	24.185	-0.201	20.3318	16.1849	12.7097	3.9839	2.4427	1.471
Ph4P+	C	Training Set	2.22	3.11	0.04	0.92	2.766	0.48	0		4	13.59	111.224	-13.628	3.394	0	0	4.2629	-1	0.893	-0.608	0.487	-0.387	0.321	-0.002	0.564	0.015	0	0	0	0
Piperidine+	C	Training Set	0.27	2.73	0.98	0	0.8258	1.178	0		1	16.61	25.385	-4.848	0.862	0	2	1.2541	-1	1.202	-1.864	3.308	-6.261	12.218	-0.1658	16.7569	12.7933	9.274	0	0	0
Propanolol+	C	Training Set	1.69	4.31	2.07	0	2.1695	2.432	0		2	46.07	79.696	-11.536	2.604	1	2	3.3724	-1	1.632	-1.597	2.863	-4.624	9.24	-0.1373	14.3283	9.4428	6.3205	0.8198	0.324	0.077
Propylamine+	C	Training Set	0.08	2.18	1.4	0	0.6526	0.675	0		0	27.64	20.5	-4.112	0.601	0	3	0.9868	-1	1.547	-2.771	5.294	-10.379	20.607	-0.2461	24.6789	19.3636	14.3051	0	0	0
PyO-3Me+	C	Training Set	0.53	2.89	1.6	0	0.8964	0.855	0		1	22.12	32.251	-5.772	1.111	0	0	1.5163	-1	1.23	-1.615	2.733	-4.644	8.659	-0.1718	17.6558	11.8146	7.7301	0.3073	0.0595	0.001
PyO-4Cl+	C	Training Set	0.66	2.45	1.55	0	0.8779	0.712	0		1	25.16	31.392	-5.788	1.306	0	0	1.413	-1	1.355	-1.923	3.3	-6.07	12.103	-0.1784	17.9008	11.5719	7.1998	0	0	0
PyO-4Cyano+	C	Training Set	0.68	2.38	1.84	0	0.9102	1.144	0		1	48.95	31.097	-5.068	1.211	0	0	1.4476	-1	1.744	-2.359	4.605	-8.693	18.755	-0.2146	21.4609	14.9201	9.7202	0.7128	0.1126	0.001
PyO-4Me+	C	Training Set	0.53	2.91	1.5	0	0.8964	0.695	0		1	25.16	31.348	-5.357	1.101	0	0	1.4101	-1	1.205	-1.595	2.7	-4.91	9.793	-0.1407	14.4235	9.3874	6.2814	0.0151	0	0
Sertraline+	C	Training Set	1.68	3.16	2.18	0	2.2862	1.814	0		3	16.61	87.247	-12.762	3.072	0	2	3.6147	-1	1.524	-1.87	3.248	-6.086	12.293	-0.1326	14.0482	9.9319	7.2614	0	0	0
Tacrine+	C	Training Set	1.83	7.24	5.02	0	1.6206	-0.539	0		3	16.13	64.542	-8.426	1.993	0	3	2.4753	-1	1.972	-3.098	7.489	-14.895	35.707	-0.2649	26.5763	21.5927	16.9461	3.2134	1.9737	1.031
Tamoxifen+	C	Training Set	1.87	4.51	2.53	0	3.1962	2.317	0		4	21.26	119.893	-15.736	3.725	0	1	4.9804	-1	1.809	-1.541	2.806	-4.619	9.286	-0.1121	12.2581	8.2272	0.2181	0.0264	6.126	0
tert-Butylamine+	C	Training Set	-0.03	2.32	1.32	0	0.7935	0.747	0		0	27.64	25.345	-4.65	0.742	0	3	1.2167	-1	1.401	-2.439	4.636	-9.125	18.239	-0.2223	22.3347	17.4351	12.8008	0	0	0
Timolol+	C	Training Set	1.32	5.67	2.83	0	2.3974	2.269	0		2	112.56	79.9	-12.257	3.174	1	2	3.8701	-1	1.958	-1.162	3.571	-3.706	10.524	-0.1494	15.4764	10.1936	6.6096	6.9672	3.3344	1.194
Verapamil+	C	Training Set	1.66	7.7	4.33	0	3.8074	2.404	0		2	65.15	133.719	-17.465	4.556	0	1	5.933	-1	2.178	-0.982	3.308	-3.221	9.629	-0.108	11.5248	7.7468	5.6455	7.0409	3.0398	0.831
Fumaricacid2-	DA	Training Set	1.01	5.29	0	5.46	0.735	0	4.006		0	80.26	20.527	-3.715	1.141	0	0	1.2291	2	3.801	7.703	16.256	35.173	77.702	0	0	0	0	88.8193	71.1297	54.001
Maleicacid2-	DA	Training Set	1.01	3.82	0	5.88	0.735	0	4		0	80.26	20.527	-3.631	1.141	0	0	1.2299	2	4.045	8.368	18.023	39.6	88.661	0	0	0	0	95.0279	76.653	59.129
Phthalicacid2-	DA	Training Set	1.4	3.88	0	5.25	1.104	0	3.124		1	80.26	36.476	-5.331	1.641	0	0	1.8003	2	3.97	7.824	16.513	35.556	78.304	0	0	0	0	90.2438	72.0632	54.599
Terephthalicacid2-	DA	Training Set	1.4	3.55	0	5.08	1.104	0	3.356		1	80.26	36.476	-5.514	1.641	0	0	1.7854	2	3.643	7.113	14.856	31.945	70.429	0	0	0	0	81.9738	65.3009	49.131
1 ,1,2-Trichloroethane	N	Training Set	0.5	0.68	0.13	0.13	0.757	0	0		0	0	26.116	-6.348	1.334	0	0	1.2762	0	0.418	-0.211	0.332	-0.306	0.371	-0.0164	1.9783	0.3829	0.0116	0	0	0
1 ,2-Dichloroethane	N	Training Set	0.42	0.64	0.1	0.11	0.635	0	0		0	0	21.32	-5.345	0.99	0	0	1.0466	0	0.385	-0.084	0.207	-0.092	0.133	0	0	0	0	0	0	0
1 ,2-Diphenylethane	N	Training Set	1.2	1.03	0	0.28	1.606	0	0		2	0	60.702	-9.229	1.823	0	0	2.4871	0	0.51	0.02	0.17	0.012	0.065	0	0	0	0	0	0	0
1 ,4-Dichlorobutane	N	Training Set	0.41	0.95	0	0.17	0.917	0	0		0	0	30.934	-6.859	1.27	0	0	1.4974	0	0.465	0.027	0.205	0.019	0.104	0	0.0038	0	0	0	0	0
1,1-Dichloroethene	N	Training Set	0.36	0.34	0	0.05	0.592	0	0		0	0	20.846	-5.168	0.969	0	0	0.9872	0	0.177	-0.075	0.088	-0.069	0.066	-0.0004	0.2153	0.0018	0	0	0	0
1,2,3-TrimethyIbenzene	N	Training Set	0.73	0.61	0	0.19	1.139	0	0		1	0	41.34	-6.627	1.202	0	0	1.7412	0	0.291	0.044	0.099	0.035	0.045	0	0	0	0	0	0	0
1,2,4,5-Tetramethylbenzene	N	Training Set	0.74	0.6	0	0.19	1.28	0	0		1	0	46.306	-7.357	1.342	0	0	1.9662	0	0.285	0.052	0.095	0.042	0.046	0	0	0	0	0.0149	0	0
1,2,4-TrichIorobenzene	N	Training Set	0.98	0.81	0	0	1.084	0	0		1	0	41.472	-8.018	1.815	0	0	1.7673	0	0.294	-0.124	0.162	-0.127	0.131	-0.002	0.5011	0.019	0	0	0	0
1,2-Dibromoethane	N	Training Set	0.75	0.76	0.1	0.17	0.74	0	0		0	0	27.468	-6.316	1.879	0	0	1.1716	0	0.407	-0.091	0.222	-0.104	0.147	0	0.3161	0	0	0	0	0
1,2-DichIorobenzene	N	Training Set	0.87	0.78	0	0.04	0.961	0	0		1	0	36.462	-6.872	1.47	0	0	1.5426	0	0.286	-0.089	0.12	-0.071	0.068	0	0.0792	0	0	0	0	0
1,2-Dichloropropane	N	Training Set	0.37	0.6	0.1	0.11	0.776	0	0		0	0	26.127	-5.911	1.13	0	0	1.2697	0	0.434	-0.031	0.224	-0.041	0.135	0	0.1621	0	0	0	0	0
1,2-Dimethylnaphthalene	N	Training Set	1.43	0.92	0	0.2	1.367	0	0		2	0	53.88	-7.727	1.562	0	0	2.0892	0	0.378	0	0.115	0	0.041	0	0	0	0	0	0	0
1,3,5-TrimethyIbenzene	N	Training Set	0.65	0.52	0	0.19	1.139	0	0		1	0	41.34	-6.845	1.202	0	0	1.7571	0	0.279	0.041	0.091	0.032	0.039	0	0	0	0	0	0	0
1,3-Dibromobenzene	N	Training Set	1.17	0.88	0	0.04	1.066	0	0		1	0	41.842	-7.97	2.359	0	0	1.6779	0	0.323	-0.114	0.152	-0.1	0.099	-0.0003	0.2183	0.002	0	0	0	0
1,3-Dimethoxybenzene	N	Training Set	0.82	1.01	0	0.45	1.116	0	0		1	18.46	39.426	-6.495	1.382	0	0	1.7483	0	0.589	0.171	0.424	0.314	0.484	0	0.0042	0	0	2.4522	0.8158	0.113
1,4-Dichlorobenzene	N	Training Set	0.83	0.75	0	0.02	0.961	0	0		1	0	36.462	-7.023	1.47	0	0	1.5508	0	0.316	-0.119	0.157	-0.106	0.105	0	0.2187	0	0	0	0	0
1,4-DimethyInaphthalene	N	Training Set	1.4	0.91	0	0.2	1.367	0	0		2	0	53.88	-7.761	1.562	0	0	2.1007	0	0.369	-0.001	0.11	-0.001	0.039	0	0	0	0	0	0	0
1,4-Dioxane	N	Training Set	0.33	0.75	0	0.64	0.681	0	0		1	18.46	21.398	-4.108	0.881	0	0	1.1026	0	0.574	0.48	0.858	1.167	1.815	0	0	0	0	7.3527	4.1044	1.742
1,7-DimethyInaphthalene	N	Training Set	1.37	0.89	0	0.2	1.367	0	0		2	0	53.88	-7.847	1.562	0	0	2.1039	0	0.372	0.001	0.111	0.001	0.039	0	0	0	0	0	0	0
1-Chlorobutane	N	Training Set	0.21	0.4	0	0.1	0.795	0	0		0	0	26.138	-5.638	0.926	0	0	1.2617	0	0.253	0.042	0.103	0.03	0.053	0	0	0	0	0	0	0
1-Chlorohexane	N	Training Set	0.2	0.4	0	0.1	1.077	0	0		0	0	35.752	-7.119	1.206	0	0	1.7036	0	0.268	0.044	0.104	0.031	0.053	0	0	0	0	0	0	0
1-Chlorooctane	N	Training Set	0.19	0.4	0	0.1	1.359	0	0		0	0	45.366	-8.554	1.487	0	0	2.143	0	0.284	0.047	0.106	0.032	0.054	0	0	0	0	0	0	0
1-Chloropropane	N	Training Set	0.22	0.4	0	0.1	0.654	0	0		0	0	21.331	-4.896	0.785	0	0	1.0401	0	0.247	0.038	0.103	0.029	0.053	0	0	0	0	0	0	0
1-Cyano-2-methylpropane	N	Training Set	0.16	0.87	0	0.36	0.827	0	0		0	23.79	25.898	-4.751	0.831	0	0	1.2974	0	0.459	0.231	0.463	0.438	0.668	0	0.048	0	0	3.2718	1.2814	0.294
1-Dromohexane	N	Training Set	0.35	0.4	0	0.12	1.129	0	0		0	0	38.826	-7.595	1.651	0	0	1.7631	0	0.279	0.043	0.109	0.029	0.055	0	0.0007	0	0	0	0	0
1-Dromooctane	N	Training Set	0.34	0.4	0	0.12	1.411	0	0		0	0	48.44	-9.077	1.931	0	0	2.2046	0	0.294	0.045	0.11	0.029	0.056	0	0.0007	0	0	0	0	0
1-Ethylnaphthalene	N	Training Set	1.37	0.88	0	0.2	1.367	0	0		2	0	53.721	-7.785	1.562	0	0	2.104	0	0.371	-0.015	0.113	-0.011	0.041	0	0.0001	0	0	0	0	0
1-Fluorobutane	N	Training Set	0.02	0.35	0	0.1	0.69	0	0		0	0	21.393	-4.481	0.761	0	0	1.1151	0	0.244	0.09	0.127	0.086	0.089	0	0	0	0	0.2125	0	0
1-Iodoheptane	N	Training Set	0.61	0.4	0	0.15	1.354	0	0		0	0	48.726	-8.906	2.261	0	0	2.0875	0	0.284	0.032	0.097	0.016	0.045	0	0.0015	0	0	0	0	0
1-Iodopentane	N	Training Set	0.62	0.4	0	0.15	1.07	0	0		0	0	39.112	-7.418	1.981	0	0	1.6449	0	0.269	0.029	0.096	0.015	0.045	0	0.0019	0	0	0	0	0
1-Iodopropane	N	Training Set	0.63	0.4	0	0.15	0.79	0	0		0	0	29.498	-5.983	1.7	0	0	1.2053	0	0.258	0.025	0.098	0.014	0.046	0	0.0008	0	0	0	0	0
1-Methylcyclohexene	N	Training Set	0.39	0.2	0	0.1	0.943	0	0		1	0	33.175	-5.607	0.962	0	0	1.4391	0	0.151	0.046	0.058	0.041	0.04	0	0	0	0	0.1276	0.0023	0
1-Methylfluorene	N	Training Set	1.59	1.06	0	0.2	1.497	0	0		3	0	59.855	-8.471	1.803	0	0	2.3303	0	0.45	0.001	0.147	0.001	0.056	0	0	0	0	0	0	0
1-Methylnaphthalene	N	Training Set	1.34	0.9	0	0.2	1.226	0	0		2	0	48.914	-7.151	1.422	0	0	1.8891	0	0.37	-0.016	0.114	-0.011	0.041	0	0	0	0	0	0	0
1-Methylphenanthrene	N	Training Set	2.06	1.25	0	0.26	1.595	0	0		3	0	66.42	-8.873	1.923	0	0	2.4478	0	0.468	-0.053	0.154	-0.039	0.064	0	0.0315	0	0	0	0	0
1-Naphthylamine	N	Training Set	1.67	1.26	0.2	0.57	1.185	0	0		2	26.02	48.352	-6.689	1.432	0	2	1.8208	0	0.707	-0.133	0.687	-0.222	1.096	-0.033	3.406	1.4309	0.3672	1.5608	0.8564	0.359
1-Nitrobutane	N	Training Set	0.23	0.95	0	0.29	0.847	0	0		0	49.66	27.867	-4.601	1.031	0	0	1.346	0	0.513	0.106	0.395	0.147	0.385	-0.0003	0.2253	0.0026	0	1.3664	0.2467	0.007
1-Nitropentane	N	Training Set	0.21	0.95	0	0.29	0.988	0	0		0	49.66	32.673	-5.375	1.172	0	0	1.5731	0	0.496	0.119	0.362	0.154	0.346	-0.0006	0.2023	0.0118	0	1.2379	0.2124	0.006
1-Nitropropane	N	Training Set	0.24	0.95	0	0.31	0.706	0	0		0	49.66	23.06	-3.871	0.891	0	0	1.1281	0	0.509	0.102	0.397	0.146	0.386	-0.0003	0.2275	0.0027	0	1.3681	0.2481	0.007
1-Octanethiol	N	Training Set	0.35	0.35	0	0.24	1.3993	0	0		0	38.8	48.499	-8.769	1.463	0	0	2.1979	0	0.345	0.105	0.238	0.157	0.261	-0.0001	0.099	0.0006	0	1.2718	0.3184	0.023
1-Phenylethanol	N	Training Set	0.78	0.83	0.3	0.66	1.057	0	0		1	20.23	37.377	-6.113	1.222	1	0	1.649	0	0.645	0.102	0.901	0.277	1.991	-0.0285	2.877	1.654	0.7628	4.4565	2.6463	1.247
2,1-Benzisoxazole	N	Training Set	0.97	1.1	0	0.36	0.864	0	0		2	26.03	34.009	-5.086	1.191	0	0	1.3994	0	0.562	0.09	0.599	0.336	0.981	-0.0094	1.0182	0.2191	0.0043	3.163	1.6951	0.68
2,2,4-Trimethylpentane	N	Training Set	0	0	0	0	1.236	0	0		0	0	40.31	-6.733	1.142	0	0	1.908	0	0.106	0.005	0.011	0.001	0.001	0	0	0	0	0	0	0
2,2-Dimethylpentane	N	Training Set	0	0	0	0	1.095	0	0		0	0	35.503	-6.238	1.002	0	0	1.6805	0	0.097	0.005	0.01	0.001	0.001	0	0	0	0	0	0	0
2,3,5-Trimethylphenol	N	Training Set	0.86	0.84	0.52	0.42	1.198	0	0		1	20.23	43.363	-6.68	1.362	1	0	1.8445	0	0.571	-0.02	0.66	-0.264	1.346	-0.028	2.8221	1.8307	0.998	1.9645	0.7864	0.157
2,3,6-Trimethylnaphthalene	N	Training Set	1.43	0.86	0	0.21	1.508	0	0		2	0	58.687	-8.491	1.703	0	0	2.3296	0	0.38	0.015	0.11	0.01	0.038	0	0	0	0	0	0	0
2,3-Dimethylbutan-2-ol	N	Training Set	0.21	0.27	0.31	0.6	1.013	0	0		0	20.23	36.963	-6.151	1.162	1	0	1.7763	0	0.465	0.186	0.806	0.584	1.96	-0.0205	2.0809	1.0642	0.4039	4.8839	3.0915	1.579
2,3-Dimethylbutane	N	Training Set	0	0	0	0	0.954	0	0		0	0	30.956	-5.555	0.862	0	0	1.459	0	0.084	0.003	0.008	0	0.001	0	0	0	0	0	0	0
2,3-Dimethylnaphthalene	N	Training Set	1.43	0.95	0	0.2	1.367	0	0		2	0	53.88	-7.87	1.562	0	0	2.0992	0	0.375	-0.004	0.115	-0.003	0.041	0	0	0	0	0	0	0
2,4,6-Trimethylphenol	N	Training Set	0.86	0.79	0.37	0.44	1.198	0	0		1	20.23	43.363	-6.784	1.362	1	0	1.855	0	0.545	-0.041	0.616	-0.308	1.25	-0.0279	2.8133	1.822	0.9896	1.6591	0.5636	0.08
2,4-Dimethylpentane	N	Training Set	0	0	0	0	1.095	0	0		0	0	35.763	-6.303	1.002	0	0	1.6875	0	0.095	0.004	0.01	0.001	0.001	0	0	0	0	0	0	0
2,4-Dimethylphenol	N	Training Set	0.84	0.8	0.53	0.39	1.057	0	0		1	20.23	38.397	-6.087	1.222	1	0	1.6366	0	0.569	-0.051	0.676	-0.333	1.42	-0.0296	2.9893	1.9649	1.0962	1.9256	0.7548	0.144
2,4-Dimethylpyridine	N	Training Set	0.63	0.76	0	0.63	0.957	0	0		1	12.89	34.169	-5.747	1.072	0	0	1.4899	0	0.468	0.364	0.813	1.348	2.603	0	0	0	0	5.3554	3.6599	2.341
2,5-Dimethylpyrazine	N	Training Set	0.63	0.9	0	0.69	0.916	0	0		1	25.78	31.964	-5.317	1.081	0	0	1.4302	0	0.563	0.471	0.964	1.451	2.578	0	0.0038	0	0	7.063	4.5462	2.588
2,5-Dimethyltetrahydrofuran	N	Training Set	0.2	0.38	0	0.58	0.904	0	0		1	9.23	29.927	-5.456	1.002	0	0	1.4298	0	0.351	0.354	0.606	0.943	1.545	0	0	0	0	5.1377	3.2165	1.642
2,6-Dimethylphenol	N	Training Set	0.86	0.79	0.39	0.39	1.057	0	0		1	20.23	38.397	-6.064	1.222	1	0	1.632	0	0.551	-0.062	0.623	-0.355	1.264	-0.0289	2.9133	1.8968	1.0355	1.5156	0.4813	0.059
2,6-Dimethylpyridine	N	Training Set	0.61	0.7	0	0.63	0.957	0	0		1	12.89	34.169	-5.747	1.072	0	0	1.4782	0	0.456	0.341	0.788	1.32	2.607	0	0.0003	0	0	4.9675	3.4608	2.268
2-Bromo-2-methylpropane	N	Training Set	0.31	0.25	0	0.12	0.847	0	0		0	0	29.25	-5.783	1.37	0	0	1.3255	0	0.289	0.076	0.129	0.067	0.074	0	0	0	0	0	0	0
2-Bromopropane	N	Training Set	0.33	0.35	0	0.14	0.706	0	0		0	0	24.405	-5.28	1.23	0	0	1.1044	0	0.276	0.05	0.119	0.042	0.062	0	0	0	0	0	0	0
2-Bromotoluene	N	Training Set	0.92	0.72	0	0.09	1.032	0	0		1	0	39.108	-6.891	1.71	0	0	1.5998	0	0.298	-0.04	0.095	-0.028	0.039	0	0.0057	0	0	0	0	0
2-Chloroaniline	N	Training Set	1.03	0.92	0.25	0.31	0.939	0	0		1	26.02	35.856	-5.997	1.276	0	2	1.4696	0	0.55	-0.254	0.53	-0.536	0.84	-0.0365	3.7264	1.7838	0.5575	0.0597	0.0001	0
2-Chlorobutane	N	Training Set	0.19	0.35	0	0.12	0.795	0	0		0	0	26.138	-5.45	0.926	0	0	1.2541	0	0.258	0.056	0.108	0.048	0.058	0	0	0	0	0	0	0
2-Chlorophenol	N	Training Set	0.85	0.88	0.32	0.31	0.898	0	0		1	20.23	33.475	-5.8	1.286	1	0	1.4198	0	0.483	-0.152	0.566	-0.459	1.187	-0.0286	2.8851	1.889	1.0453	1.0867	0.2929	0.018
2-Chloropyridine	N	Training Set	0.74	1.03	0	0.37	0.798	0	0		1	12.89	29.247	-5.497	1.136	0	0	1.2765	0	0.433	0.099	0.46	0.396	0.845	0	0.1231	0	0	2.7265	1.5679	0.742
2-Chlorotoluene	N	Training Set	0.76	0.65	0	0.07	0.98	0	0		1	0	36.418	-6.441	1.266	0	0	1.537	0	0.287	-0.039	0.092	-0.028	0.037	0	0.0054	0	0	0	0	0
2-Cyano-2-methylpropane	N	Training Set	0.14	0.84	0	0.36	0.827	0	0		0	23.79	25.638	-4.666	0.831	0	0	1.2851	0	0.43	0.257	0.424	0.459	0.619	0	0	0	0	3.18	1.2168	0.268
2-Cyanophenol	N	Training Set	0.92	1.33	0.74	0.33	0.93	0	0		1	44.02	33.18	-5.134	1.191	1	0	1.4634	0	0.717	-0.131	1.014	-0.666	2.287	-0.0417	4.2614	2.9949	1.8737	2.6131	0.7233	0.082
2-Cyanopropane	N	Training Set	0.14	0.87	0	0.36	0.686	0	0		0	23.79	21.091	-4.092	0.691	0	0	1.0664	0	0.446	0.241	0.451	0.451	0.651	0	0.0083	0	0	3.248	1.2611	0.285
2-Ethylhexanoic acid	N	Training Set	0.18	0.57	0.6	0.5	1.31	0	0		0	40.13	40.4	-6.955	1.442	1	0	2.0502	0	0.686	-0.012	1.195	-0.56	2.959	-0.0522	5.2186	3.6221	2.2606	4.5389	1.7842	0.373
2-Ethylphenyl acetate	N	Training Set	0.68	1.04	0	0.58	1.354	0	0		1	26.3	47.714	-7.431	1.642	0	0	2.1308	0	0.626	0.235	0.528	0.458	0.704	0	0.0102	0	0	3.5704	1.3399	0.268
2-Iodophenol	N	Training Set	1.36	1	0.4	0.35	1.033	0	0		1	20.23	41.182	-6.85	2.2	1	0	1.5831	0	0.48	-0.116	0.481	-0.3	0.868	-0.0218	2.2003	1.3915	0.7128	1.042	0.2669	0.013
2-Isopropyl-5-methylphenol	N	Training Set	0.82	0.79	0.52	0.44	1.339	0	0		1	20.23	48.011	-7.328	1.502	1	0	2.0675	0	0.513	0.022	0.5	-0.112	0.915	-0.0181	1.8391	1.1485	0.6374	1.6263	0.6163	0.101
2-Isopropylphenol	N	Training Set	0.84	0.88	0.52	0.38	1.198	0	0		1	20.23	43.045	-6.593	1.362	1	0	1.845	0	0.565	-0.065	0.654	-0.382	1.392	-0.0299	3.0103	1.9361	1.0974	1.6262	0.6037	0.093
2-Methoxyethanol	N	Training Set	0.27	0.5	0.3	0.84	0.649	0	0		0	29.46	18.782	-3.989	0.761	1	0	1.0396	0	0.741	0.342	1.395	0.84	3.289	-0.0357	3.5935	2.1628	1.035	8.6206	5.0448	2.346
2-Methylanisole	N	Training Set	0.73	0.75	0	0.3	1.057	0	0		1	9.23	37.9	-6.3	1.222	0	0	1.6401	0	0.411	0.078	0.212	0.111	0.172	0	0.001	0	0	0.7503	0.1563	0.007
2-Methylbenzonitrile	N	Training Set	0.78	1.06	0	0.31	1.012	0	0		1	23.79	36.123	-5.751	1.172	0	0	1.5802	0	0.502	0.151	0.428	0.319	0.538	0	0.0382	0	0	2.6352	0.9228	0.166
2-Methylbuta-1,3-diene	N	Training Set	0.31	0.23	0	0.1	0.727	0	0		0	0	25.201	-4.787	0.681	0	0	1.1293	0	0.241	0.022	0.086	0.021	0.039	0	0	0	0	0.0053	0	0
2-Methylbutane	N	Training Set	0	0	0	0	0.813	0	0		0	0	26.149	-5.013	0.722	0	0	1.2432	0	0.075	0.003	0.007	0	0.001	0	0	0	0	0	0	0
2-Methylhexane	N	Training Set	0	0	0	0	1.095	0	0		0	0	35.763	-6.497	1.002	0	0	1.6815	0	0.09	0.004	0.009	0.001	0.001	0	0	0	0	0	0	0
2-Methylpropane	N	Training Set	0	0	0	0	0.672	0	0		0	0	21.342	-4.353	0.581	0	0	1.0328	0	0.067	0.003	0.007	0	0.001	0	0	0	0	0	0	0
2-Methylpyridine	N	Training Set	0.6	0.75	0	0.58	0.816	0	0		1	12.89	29.203	-5.035	0.931	0	0	1.2691	0	0.458	0.313	0.756	1.182	2.286	0	0.0022	0	0	4.9518	3.3536	2.109
2-Naphthol	N	Training Set	1.52	1.08	0.61	0.4	1.144	0	0		2	20.23	45.971	-6.571	1.442	1	0	1.782	0	0.723	-0.28	0.984	-0.997	2.433	-0.0524	5.2861	3.6836	2.2675	1.5451	0.5548	0.076
2-Nitroaniline	N	Training Set	1.18	1.37	0.3	0.36	0.991	0	0		1	75.68	38.088	-5.017	1.381	0	2	1.5407	0	0.784	-0.071	0.965	-0.252	1.639	-0.0404	4.1735	2.2308	0.8857	3.0717	1.0894	0.219
2-Nitrotoluene	N	Training Set	0.87	1.11	0	0.27	1.032	0	0		1	49.66	38.65	-5.482	1.371	0	0	1.6111	0	0.51	0.117	0.372	0.211	0.375	0	0.017	0	0	1.607	0.4351	0.038
2-tert-Butylphenol	N	Training Set	0.82	0.92	0.52	0.4	1.339	0	0		1	20.23	47.735	-7.037	1.502	1	0	2.0434	0	0.517	-0.003	0.508	-0.18	0.976	-0.0187	1.8977	1.2379	0.7245	1.4865	0.5326	0.074
3,3-Dimethylbutan-2-one	N	Training Set	0.11	0.62	0	0.51	0.97	0	0		0	17.07	30.896	-5.286	1.002	0	0	1.502	0	0.431	0.327	0.551	0.701	1.026	0	0	0	0	4.8072	2.3086	0.743
3,4,5-Trimethylphenol	N	Training Set	0.83	0.88	0.55	0.44	1.198	0	0		1	20.23	43.363	-6.663	1.362	1	0	1.8522	0	0.641	-0.134	0.919	-0.669	2.191	-0.0467	4.7159	3.2189	1.8876	2.1932	0.931	0.213
3,5-Dichlorophenol	N	Training Set	1.02	1.17	0.77	0	1.02	0	0		1	20.23	38.485	-6.927	1.63	1	0	1.655	0	0.64	-0.427	1.081	-1.43	3.016	-0.0607	6.2767	4.3533	2.8473	1.0493	0.2753	0.016
3,5-Dimethylphenol	N	Training Set	0.82	0.84	0.57	0.36	1.057	0	0		1	20.23	38.397	-6.157	1.222	1	0	1.6461	0	0.632	-0.169	0.923	-0.769	2.243	-0.0485	4.8933	3.3624	2.0073	1.9619	0.779	0.147
3,5-Dimethylpyridine	N	Training Set	0.66	0.79	0	0.6	0.957	0	0		1	12.89	34.169	-5.695	1.072	0	0	1.4867	0	0.462	0.364	0.792	1.29	2.441	0	0	0	0	5.386	3.6284	2.241
3-Acetylpyridine	N	Training Set	0.8	1.17	0	0.9	0.973	0	0		1	29.96	34.432	-5.462	1.211	0	0	1.528	0	0.727	0.447	1.035	1.264	2.24	0	0.0538	0	0	7.5547	3.9807	1.824
3-Aminobiphenyl	N	Training Set	1.56	1.51	0.26	0.48	1.424	0	0		2	26.02	56.282	-7.956	1.692	0	2	2.1786	0	0.807	-0.255	0.675	-0.558	0.943	-0.0402	4.1191	1.8826	0.5484	0.1042	0.0043	0
3-Bromophenol	N	Training Set	1.06	1.15	0.7	0.16	0.95	0	0		1	20.23	36.165	-6.398	1.73	1	0	1.5015	0	0.66	-0.381	1.059	-1.311	2.881	-0.0596	6.0424	4.2132	2.7085	1.2409	0.3702	0.032
3-Cyanopyridine	N	Training Set	0.75	1.26	0	0.62	0.829	0	0		1	36.68	28.952	-4.757	1.041	0	0	1.3139	0	0.677	0.267	0.839	0.745	1.533	-0.0013	0.5179	0.0096	0	5.0867	2.5337	1.117
3-Ethylphenol	N	Training Set	0.81	0.91	0.55	0.37	1.057	0	0		1	20.23	38.238	-6.096	1.222	1	0	1.632	0	0.637	-0.181	0.93	-0.802	2.271	-0.0491	4.9568	3.4108	2.0485	1.9058	0.7501	0.138
3-Ethylpyridine	N	Training Set	0.64	0.79	0	0.57	0.957	0	0		1	12.89	34.01	-5.679	1.072	0	0	1.4964	0	0.466	0.336	0.772	1.217	2.321	0	0.0022	0	0	5.1734	3.4855	2.146
3-Fluorophenol	N	Training Set	0.67	0.98	0.68	0.17	0.793	0	0		1	20.23	28.423	-4.791	1.121	1	0	1.2957	0	0.649	-0.351	1.041	-1.224	2.763	-0.0579	5.8913	4.0761	2.5953	1.3504	0.4325	0.045
3-Fluoropyridine	N	Training Set	0.5	0.74	0	0.43	0.693	0	0		1	12.89	24.195	-4.313	0.971	0	0	1.1357	0	0.462	0.189	0.644	0.753	1.555	-0.0003	0.1912	0.0011	0	3.9906	2.544	1.451
3-Formylpyridine	N	Training Set	0.82	1.16	0	0.76	0.832	0	0		1	29.96	29.625	-4.819	1.071	0	0	1.3223	0	0.693	0.391	0.95	1.09	1.959	0	0.0823	0	0	6.6983	3.43	1.556
3-Isopropylbenzenesulfonamide	N	Training Set	1.09	1.55	0.55	0.92	1.52	0	0		1	68.54	52.016	-7.688	1.993	0	2	2.3882	0	1.135	-0.033	1.621	-0.412	3.03	-0.0691	6.9902	4.163	1.8931	6.4233	1.9896	0.218
3-Methoxyaniline	N	Training Set	1.03	1.22	0.25	0.55	1.016	0	0		1	35.25	37.338	-5.818	1.232	0	2	1.5768	0	0.798	0.048	0.875	0.154	1.428	-0.0285	2.9983	1.137	0.2418	3.4467	1.692	0.652
3-Methoxyphenol	N	Training Set	0.88	1.17	0.59	0.39	0.975	0	0		1	29.46	34.957	-5.647	1.241	1	0	1.5339	0	0.787	-0.153	1.122	-0.789	2.642	-0.0516	5.2215	3.6221	2.2327	2.8345	1.0226	0.151
3-Methylacetanilide	N	Training Set	0.87	1.4	0.5	0.66	1.254	0	0		1	29.1	45.721	-7.086	1.492	0	1	1.9393	0	0.793	0.152	1.114	0.333	2.372	-0.0317	3.2296	1.9538	0.9508	5.9413	3.1696	1.238
3-Methylacetophenone	N	Training Set	0.81	1	0	0.49	1.155	0	0		1	17.07	41.603	-6.585	1.342	0	0	1.7927	0	0.556	0.271	0.584	0.629	0.977	0	0.0055	0	0	4.6611	2.117	0.615
3-Methylbenzaldehyde	N	Training Set	0.84	0.97	0	0.42	1.014	0	0		1	17.07	36.796	-5.942	1.202	0	0	1.5874	0	0.512	0.233	0.513	0.517	0.791	0	0.0022	0	0	3.9967	1.6506	0.412
3-Methylbenzenesulfonamide	N	Training Set	1.1	1.55	0.55	0.85	1.238	0	0		1	68.54	42.402	-6.436	1.712	0	4	1.9475	0	1.056	-0.035	1.454	-0.349	2.637	-0.0611	6.1933	3.5867	1.6079	5.5919	1.6691	0.214
3-Methylbenzoic acid	N	Training Set	0.73	0.9	0.59	0.38	1.073	0	0		1	40.13	36.425	-5.897	1.362	1	0	1.6752	0	0.855	-0.058	1.473	-0.775	3.906	-0.055	5.5376	3.9923	2.6527	5.3883	2.1336	0.514
3-Methylbenzyl alcohol	N	Training Set	0.82	0.9	0.33	0.59	1.057	0	0		1	20.23	37.536	-6.173	1.222	1	0	1.6452	0	0.654	0.112	0.926	0.283	2.047	-0.0297	2.9953	1.7254	0.7916	4.5799	2.7126	1.268
3-Methylbut-1-ene	N	Training Set	0.06	0.08	0	0.07	0.77	0	0		0	0	25.675	-4.877	0.701	0	0	1.1867	0	0.175	0.043	0.068	0.04	0.043	0	0	0	0	0.1053	0.0014	0
3-Methylbutan- 1-ol	N	Training Set	0.19	0.39	0.37	0.48	0.872	0	0		0	20.23	27.311	-5.095	0.882	1	0	1.3569	0	0.539	0.215	1.083	0.683	2.779	-0.031	3.126	1.785	0.7771	6.1505	3.9757	2.139
3-Methylbutan-2-ol	N	Training Set	0.19	0.33	0.33	0.56	0.872	0	0		0	20.23	27.311	-5.028	0.882	1	0	1.3525	0	0.456	0.145	0.804	0.428	1.887	-0.0244	2.4577	1.3024	0.5303	4.6532	2.9155	1.437
3-Methylbutan-2-one	N	Training Set	0.13	0.65	0	0.51	0.829	0	0		0	17.07	26.349	-4.748	0.861	0	0	1.2929	0	0.456	0.368	0.622	0.81	1.202	0	0	0	0	5.4794	2.6856	0.931
3-Methylpentane	N	Training Set	0	0	0	0	0.954	0	0		0	0	30.956	-5.65	0.862	0	0	1.4593	0	0.082	0.003	0.008	0	0.001	0	0	0	0	0	0	0
3-Methylphenanthrene	N	Training Set	2.06	1.25	0	0.26	1.595	0	0		3	0	66.42	-8.963	1.923	0	0	2.455	0	0.466	-0.053	0.152	-0.039	0.062	0	0.0238	0	0	0	0	0
3-Methylphenyl acetate	N	Training Set	0.66	1.13	0	0.57	1.214	0	0		1	26.3	42.907	-6.914	1.502	0	0	1.9115	0	0.649	0.234	0.565	0.482	0.761	0	0.0143	0	0	3.8399	1.4438	0.302
3-Nitrophenol	N	Training Set	1.05	1.57	0.79	0.23	0.949	0	0		1	69.89	35.707	-4.916	1.391	1	0	1.5191	0	0.867	-0.306	1.368	-1.373	3.513	-0.0652	6.6227	4.6471	3.0551	2.0845	0.4625	0.017
3-Phenylpropanol	N	Training Set	0.82	0.9	0.3	0.67	1.198	0	0		1	20.23	42.184	-6.759	1.362	1	0	1.8841	0	0.725	0.205	1.069	0.591	2.476	-0.0283	2.8574	1.6057	0.7026	5.7517	3.5948	1.836
3-Propylphenol	N	Training Set	0.79	0.9	0.55	0.37	1.198	0	0		1	20.23	43.045	-6.831	1.362	1	0	1.8505	0	0.642	-0.181	0.931	-0.806	2.278	-0.0492	4.9647	3.4196	2.0561	1.9051	0.7491	0.138
4-Bromopyridine	N	Training Set	0.9	0.93	0	0.38	0.85	0	0		1	12.89	31.937	-5.948	1.58	0	0	1.3465	0	0.478	0.195	0.682	0.822	1.708	-0.0001	0.1754	0.0002	0	4.2108	2.7382	1.593
4-Bromotoluene	N	Training Set	0.88	0.74	0	0.09	1.032	0	0		1	0	39.108	-7.07	1.71	0	0	1.6144	0	0.301	-0.047	0.101	-0.035	0.044	0	0.0131	0	0	0	0	0
4-Butylphenol	N	Training Set	0.8	0.88	0.55	0.37	1.339	0	0		1	20.23	47.852	-7.577	1.502	1	0	2.073	0	0.648	-0.178	0.937	-0.789	2.291	-0.049	4.9462	3.4023	2.0383	2.0048	0.8178	0.165
4-Chloro-3-methylphenol	N	Training Set	0.92	1.02	0.65	0.22	1.038	0	0		1	20.23	38.441	-6.481	1.426	1	0	1.6386	0	0.639	-0.303	0.983	-1.074	2.555	-0.0542	5.4807	3.8138	2.3874	1.515	0.5348	0.072
4-Chloroacetophenone	N	Training Set	0.96	1.09	0	0.44	1.136	0	0		1	17.07	41.647	-7.04	1.546	0	0	1.8019	0	0.574	0.181	0.589	0.49	0.899	0	0.1247	0	0	4.1267	1.7667	0.486
4-Chloroaniline	N	Training Set	1.06	1.13	0.3	0.31	0.939	0	0		1	26.02	35.856	-6.094	1.276	0	2	1.4829	0	0.624	-0.28	0.597	-0.57	0.902	-0.0398	4.0836	1.8634	0.5351	0.1325	0.0102	0
4-Chloroanisole	N	Training Set	0.84	0.86	0	0.24	1.038	0	0		1	9.23	37.944	-6.769	1.426	0	0	1.653	0	0.447	0	0.257	0.064	0.23	0	0.0491	0	0	0.9022	0.2673	0.022
4-Chlorobenzaldehyde	N	Training Set	0.93	1.08	0	0.36	0.995	0	0		1	17.07	36.84	-6.398	1.406	0	0	1.5956	0	0.539	0.142	0.534	0.38	0.745	0	0.1704	0	0	3.5072	1.3549	0.313
4-Chlorobenzoic acid	N	Training Set	0.84	0.97	0.63	0.27	1.054	0	0		1	40.13	36.469	-6.357	1.566	1	0	1.6856	0	0.9	-0.209	1.614	-1.211	4.465	-0.0616	6.405	4.5299	3.0863	4.7832	1.7908	0.398
4-Chlorophenol	N	Training Set	0.92	1.08	0.67	0.2	0.898	0	0		1	20.23	33.475	-5.904	1.286	1	0	1.4333	0	0.657	-0.349	1.024	-1.168	2.669	-0.0558	5.6665	3.9445	2.4953	1.4234	0.4782	0.057
4-Chloropyridine	N	Training Set	0.74	0.85	0	0.4	0.798	0	0		1	12.89	29.247	-5.458	1.136	0	0	1.2801	0	0.468	0.202	0.691	0.845	1.755	-0.0001	0.1899	0.0003	0	4.2823	2.7971	1.635
4-Chlorotoluene	N	Training Set	0.71	0.67	0	0.07	0.98	0	0		1	0	36.418	-6.592	1.266	0	0	1.549	0	0.29	-0.047	0.098	-0.036	0.044	0	0.0161	0	0	0	0	0
4-Cyanophenol	N	Training Set	0.94	1.63	0.79	0.29	0.93	0	0		1	44.02	33.18	-5.201	1.191	1	0	1.4644	0	0.892	-0.233	1.51	-1.16	3.836	-0.0637	6.5804	4.6156	3.0678	3.9114	1.3279	0.243
4-Ethylbenzoic acid	N	Training Set	0.73	0.9	0.59	0.37	1.214	0	0		1	40.13	41.232	-6.571	1.502	1	0	1.8961	0	0.872	-0.045	1.51	-0.768	4.046	-0.0552	5.5572	4.0223	2.6899	5.6817	2.2786	0.565
4-Ethyltoluene	N	Training Set	0.63	0.51	0	0.18	1.139	0	0		1	0	41.181	-6.816	1.202	0	0	1.7617	0	0.279	0.033	0.088	0.023	0.036	0	0	0	0	0	0	0
4-Fluoroacetophenone	N	Training Set	0.69	1.02	0	0.47	1.032	0	0		1	17.07	36.595	-5.904	1.381	0	0	1.658	0	0.583	0.202	0.619	0.537	0.975	0	0.1278	0	0	4.4062	1.9631	0.565
4-Iodophenol	N	Training Set	1.38	1.22	0.68	0.2	1.033	0	0		1	20.23	41.182	-6.997	2.2	1	0	1.6041	0	0.682	-0.361	1.034	-1.198	2.7	-0.0562	5.7028	3.9838	2.531	1.3652	0.4425	0.443
4-Isopropyltoluene	N	Training Set	0.61	0.49	0	0.19	1.28	0	0		1	0	45.988	-7.413	1.342	0	0	1.9786	0	0.289	0.033	0.088	0.022	0.035	0	0	0	0	0	0	0
4-Methoxypyridine	N	Training Set	0.68	0.93	0	0.53	0.875	0	0		1	22.12	30.729	-5.197	1.091	0	0	1.381	0	0.63	0.387	0.978	1.409	2.749	0	0.0425	0	0	6.188	3.9434	2.383
4-Methyl pentan-2-ol	N	Training Set	0.17	0.33	0.33	0.56	1.013	0	0		0	20.23	32.118	-5.666	1.022	1	0	1.5763	0	0.453	0.149	0.791	0.473	1.924	-0.0232	2.3469	1.2169	0.4738	4.438	2.7739	1.428
4-Methylanisole	N	Training Set	0.7	0.77	0	0.3	1.057	0	0		1	9.23	37.9	-6.319	1.222	0	0	1.6435	0	0.433	0.104	0.264	0.182	0.283	0	0.0018	0	0	1.3488	0.478	0.079
4-Methylbiphenyl	N	Training Set	1.38	0.98	0	0.23	1.465	0	0		2	0	56.844	-8.431	1.682	0	0	2.2395	0	0.465	-0.041	0.164	-0.036	0.072	0	0.0475	0	0	0	0	0
4-Methylpyridine	N	Training Set	0.63	0.82	0	0.54	0.816	0	0		1	12.89	29.203	-4.989	0.931	0	0	1.2696	0	0.473	0.349	0.815	1.298	2.497	0	0.001	0	0	5.4194	3.6782	2.293
4-Nitroaniline	N	Training Set	1.22	1.91	0.42	0.38	0.991	0	0		1	75.68	38.088	-5.087	1.381	0	2	1.5609	0	0.999	-0.154	1.434	-0.545	2.68	-0.0678	6.9514	3.9768	1.6991	4.2641	1.5815	0.405
4-Nitrobenzoic acid	N	Training Set	0.99	1.43	0.68	0.51	1.172	0	0		1	89.79	38.701	-5.361	1.671	1	0	1.7703	0	1.135	-0.23	1.83	-1.472	4.831	-0.0673	7.0838	4.9107	3.4022	4.2912	1.2725	0.216
4-Nitrotoluene	N	Training Set	0.87	1.11	0	0.28	1.032	0	0		1	49.66	38.65	-5.571	1.371	0	0	1.6273	0	0.532	0.117	0.384	0.197	0.368	0	0.0529	0	0	1.4433	0.3549	0.023
4-n-Propylpyridine	N	Training Set	0.63	0.77	0	0.55	1.098	0	0		1	12.89	38.817	-6.385	1.212	0	0	1.7012	0	0.479	0.365	0.81	1.311	2.503	0	0.0006	0	0	5.4493	3.6879	2.289
4-Phenylphenol	N	Training Set	1.56	1.41	0.59	0.45	1.383	0	0		2	20.23	53.901	-7.794	1.702	1	0	2.1485	0	0.806	-0.288	1.025	-1.021	2.49	-0.0529	5.3371	3.7236	2.3085	1.5477	0.55	0.074
9,10-Dimethylanthracene	N	Training Set	2.29	1.3	0	0.26	1.736	0	0		3	0	71.386	-9.382	2.063	0	0	2.6449	0	0.473	-0.037	0.15	-0.027	0.058	0	0.0177	0	0	0	0	0
Acenaphthene	N	Training Set	1.6	1.05	0	0.2	1.259	0	0		3	0	52.876	-7.244	1.522	0	0	1.9146	0	0.409	-0.054	0.142	-0.037	0.061	0	0.0013	0	0	0	0	0
Acetaldehyde	N	Training Set	0.21	0.67	0	0.45	0.406	0	0		0	17.07	11.928	-2.768	0.441	0	0	0.6426	0	0.428	0.275	0.52	0.583	0.863	0	0	0	0	4.2625	1.8371	0.524
Acetanilide	N	Training Set	0.87	1.4	0.5	0.67	1.113	0	0		1	29.1	40.755	-6.373	1.352	0	1	1.717	0	0.795	0.122	1.124	0.277	2.387	-0.0332	3.3836	2.0681	1.0077	5.8309	3.0966	1.205
Allyl acetate	N	Training Set	0.2	0.72	0	0.49	0.845	0	0		0	26.3	26.96	-5.187	1.001	0	0	1.3444	0	0.61	0.307	0.625	0.627	0.935	0	0.0005	0	0	4.7174	1.9382	0.452
Allylbenzene	N	Training Set	0.72	0.6	0	0.22	1.096	0	0		1	0	40.548	-6.705	1.182	0	0	1.714	0	0.373	0.023	0.131	0.02	0.057	0	0	0	0	0.0185	0	0
Anthracene	N	Training Set	2.29	1.34	0	0.26	1.454	0	0		3	0	61.454	-8.385	1.782	0	0	2.2555	0	0.461	-0.063	0.149	-0.041	0.058	0	0	0	0	0	0	0
Azobenzene	N	Training Set	1.68	1.2	0	0.44	1.481	0	0		2	24.06	59.767	-8.513	1.822	0	0	2.3104	0	0.512	0.003	0.274	0.095	0.251	0	0.0013	0	0	1.1027	0.3436	0.033
Benzaldehyde	N	Training Set	0.82	1	0	0.39	0.873	0	0		1	17.07	31.83	-5.245	1.061	0	0	1.3701	0	0.516	0.203	0.516	0.479	0.771	0	0.0055	0	0	3.8542	1.563	0.382
Benzamide	N	Training Set	0.99	1.5	0.49	0.67	0.973	0	0		1	43.09	34.537	-5.398	1.211	0	2	1.5078	0	0.948	0.121	1.642	0.504	3.712	-0.0546	5.5384	3.0926	1.2742	8.4585	5.1501	2.408
Benzene	N	Training Set	0.61	0.52	0	0.14	0.716	0	0		1	0	26.442	-4.715	0.781	0	0	1.1026	0	0.273	-0.005	0.09	-0.005	0.034	0	0	0	0	0	0	0
Benzo[a] pyrene	N	Training Set	3.63	1.98	0	0.44	1.954	0	0		5	0	87.652	-10.547	2.523	0	0	3.0161	0	0.56	-0.115	0.194	-0.08	0.087	0	0.0544	0	0	0	0	0
Benzo[b]thiophene	N	Training Set	1.32	0.88	0	0.2	1.01	0	0		2	28.24	41.825	-6.664	1.342	0	0	1.606	0	0.379	-0.073	0.158	-0.066	0.087	-0.0002	0.1339	0.0013	0	0	0	0
Benzofuran	N	Training Set	0.89	0.83	0	0.15	0.905	0	0		2	13.14	36.214	-5.623	1.181	0	0	1.4497	0	0.408	-0.051	0.21	-0.048	0.144	-0.001	0.2683	0.0089	0	0.1399	0.003	0
Benzoic acid	N	Training Set	0.73	0.9	0.59	0.4	0.932	0	0		1	40.13	31.459	-5.194	1.221	1	0	1.4566	0	0.866	-0.101	1.503	-0.869	4.004	-0.056	5.6416	4.0778	2.7295	5.2401	2.0403	0.48
Benzophenone	N	Training Set	1.45	1.5	0	0.5	1.481	0	0		2	17.07	56.317	-8.214	1.822	0	0	2.2863	0	0.654	0.184	0.571	0.493	0.84	0	0.003	0	0	4.0425	1.7628	0.457
Benzotrifluoride	N	Training Set	0.23	0.48	0	0.1	0.91	0	0		1	0	31.444	-5.399	1.461	0	0	1.5401	0	0.282	-0.096	0.109	-0.068	0.059	0	0.0554	0	0	0	0	0
Benzyl acetate	N	Training Set	0.8	1.06	0	0.65	1.214	0	0		1	26.3	42.307	-7.005	1.502	0	0	1.915	0	0.718	0.283	0.653	0.601	0.929	0	0	0	0	4.662	1.87	0.425
Benzylamine	N	Training Set	0.83	0.88	0.1	0.72	0.957	0	0		1	27.64	35.373	-5.614	1.072	0	2	1.4885	0	0.676	0.442	1.347	2.341	5.536	-0.0054	0.6223	0.1043	0.0002	6.3517	4.8859	3.597
Bromobenzene	N	Training Set	0.88	0.73	0	0.09	0.891	0	0		1	0	34.142	-6.344	1.57	0	0	1.3885	0	0.305	-0.069	0.114	-0.052	0.055	0	0.0202	0	0	0	0	0
Bromocyclohexane	N	Training Set	0.62	0.54	0	0.16	1.02	0	0		1	0	36.712	-6.581	1.631	0	0	1.582	0	0.263	0.074	0.108	0.055	0.059	0	0	0	0	0	0	0
Bromomethane	N	Training Set	0.4	0.43	0	0.1	0.425	0	0		0	0	14.791	-3.952	0.949	0	0	0.6684	0	0.253	-0.005	0.125	-0.01	0.069	0	0.024	0	0	0	0	0
But-1-ene	N	Training Set	0.1	0.08	0	0.07	0.629	0	0		0	0	20.868	-4.305	0.561	0	0	0.9717	0	0.167	0.039	0.065	0.036	0.039	0	0	0	0	0.0927	0	0
But-2-yne	N	Training Set	0.26	0.3	0	0.15	0.586	0	0		0	0	19.504	-4.264	0.541	0	0	0.9017	0	0.297	0.088	0.171	0.103	0.128	0	0	0	0	0.4011	0.0066	0
Butan- 1-ol	N	Training Set	0.22	0.42	0.37	0.48	0.731	0	0		0	20.23	22.504	-4.509	0.741	1	0	1.1371	0	0.525	0.215	1.079	0.663	2.761	-0.0312	3.1334	1.7998	0.8013	6.1571	3.9518	2.105
Butan-2-ol	N	Training Set	0.22	0.36	0.33	0.56	0.731	0	0		0	20.23	22.504	-4.447	0.741	1	0	1.1377	0	0.477	0.194	0.905	0.597	2.216	-0.025	2.5133	1.3298	0.5347	5.389	3.4381	1.756
Butanal	N	Training Set	0.19	0.65	0	0.45	0.688	0	0		0	17.07	21.542	-4.192	0.721	0	0	1.0742	0	0.393	0.257	0.451	0.52	0.745	0	0	0	0	3.7995	1.6096	0.422
Buthanethiol	N	Training Set	0.38	0.43	0	0.21	0.8357	0	0		0	38.8	29.271	-5.799	0.902	0	0	1.3207	0	0.315	0.1	0.234	0.152	0.256	-0.0001	0.1015	0.0007	0	1.2431	0.3013	0.019
Catechol	N	Training Set	0.97	1.07	0.85	0.52	0.834	0	0		1	40.46	30.488	-4.773	1.101	2	0	1.3103	0	0.928	-0.523	1.932	-2.38	5.93	-0.1052	10.5293	7.7795	5.198	3.1043	1.1261	0.18
Chloroacetic acid	N	Training Set	0.37	1.08	0.74	0.36	0.587	0	0		0	40.13	16.354	-4.016	0.945	1	0	0.9696	0	0.857	-0.34	1.532	-1.49	4.116	-0.0727	7.5522	4.9273	3.232	3.0527	1.0061	0.179
Chloroethane	N	Training Set	0.23	0.4	0	0.1	0.513	0	0		0	0	16.524	-4.154	0.645	0	0	0.818	0	0.255	0.03	0.115	0.025	0.06	0	0.0002	0	0	0	0	0
Chloromethane	N	Training Set	0.25	0.43	0	0.08	0.372	0	0		0	0	11.717	-3.431	0.505	0	0	0.6045	0	0.244	0.001	0.12	-0.002	0.066	0	0.0079	0	0	0	0	0
Cinnoline	N	Training Set	1.28	1	0	0.78	1.003	0	0		2	25.78	39.538	-5.651	1.302	0	0	1.5724	0	0.722	0.453	1.177	1.568	2.964	0	0.1131	0	0	8.2645	5.2038	2.844
cis-1,2-Dimethylcyclohexane	N	Training Set	0.28	0.1	0	0	1.127	0	0		1	0	38.456	-6.14	1.122	0	0	1.7119	0	0.08	0.004	0.007	0.001	0.001	0	0	0	0	0	0	0
Cyclohepta-1,3,5-triene	N	Training Set	0.76	0.46	0	0.2	0.857	0	0		1	0	32.227	-5.288	0.921	0	0	1.3158	0	0.303	0.041	0.12	0.04	0.064	0	0	0	0	0.0891	0.0085	0
Cycloheptanol	N	Training Set	0.51	0.54	0.32	0.58	1.045	0	0		1	20.23	34.811	-5.608	1.142	1	0	1.616	0	0.505	0.249	1.002	0.758	2.544	-0.0252	2.5282	2.5282	0.5743	6.0821	3.9173	2.077
Cyclohexa- 1,4-diene	N	Training Set	0.5	0.35	0	0.17	0.759	0	0		1	0	27.894	-4.84	0.801	0	0	1.1542	0	0.249	0.069	0.11	0.064	0.069	0	0	0	0	0.1658	0	0
Cyclohexane	N	Training Set	0.31	0.1	0	0	0.845	0	0		1	0	28.842	-4.935	0.842	0	0	1.2643	0	0.057	0.003	0.005	0.001	0.001	0	0	0	0	0	0	0
Cyclohexanone	N	Training Set	0.4	0.86	0	0.56	0.861	0	0		1	17.07	29.042	-4.828	0.981	0	0	1.3336	0	0.462	0.407	0.666	0.899	1.338	0	0	0	0	5.9267	2.9851	1.085
Cyclohexylamine	N	Training Set	0.33	0.56	0.16	0.58	0.945	0	0		1	27.64	32.807	-5.177	0.992	0	2	1.4436	0	0.469	0.524	1.379	2.749	6.445	-0.0022	0.3632	0.0258	0	6.8655	5.3155	3.962
Cyclooctane	N	Training Set	0.41	0.1	0	0	1.127	0	0		1	0	38.456	-6.133	1.122	0	0	1.7143	0	0.066	0.005	0.006	0.001	0.001	0	0	0	0	0	0	0
Cyclopentane	N	Training Set	0.26	0.1	0	0	0.705	0	0		1	0	24.035	-4.509	0.701	0	0	1.0929	0	0.059	0.002	0.005	0	0.001	0	0	0	0	0	0	0
Cyclopentanol	N	Training Set	0.43	0.54	0.32	0.56	0.763	0	0		1	20.23	25.197	-4.564	0.861	1	0	1.2106	0	0.5	0.207	0.998	0.62	2.507	-0.0279	2.83	1.5803	0.7059	5.8158	3.6413	1.88
Cyclopropylbenzene	N	Training Set	0.81	0.65	0	0.15	1.031	0	0		2	0	38.908	-6.478	1.182	0	0	1.6558	0	0.362	0.005	0.118	0.004	0.044	0	0	0	0	0	0	0
Diethyl phthalate	N	Training Set	0.73	1.4	0	0.88	1.711	0	0		1	52.6	58.615	-8.867	2.222	0	0	2.7376	0	0.853	0.408	0.838	0.799	1.182	0	0.0284	0	0	6.231	2.2527	0.406
Diethyl sulfide	N	Training Set	0.37	0.38	0	0.32	0.836	0	0		0	25.3	28.933	-5.704	0.902	0	0	1.3056	0	0.317	0.175	0.265	0.281	0.362	0	0	0	0	1.9775	0.6929	0.115
Diethylamine	N	Training Set	0.15	0.3	0.08	0.69	0.772	0	0		0	16.61	25.401	-4.875	0.731	0	1	1.1834	0	0.352	0.399	0.958	1.887	4.216	-0.0008	0.1528	0.0084	0	5.2137	3.9861	2.889
Diiodomethane	N	Training Set	1.45	0.69	0.05	0.23	0.766	0	0		0	0	32.847	-6.84	2.678	0	0	1.1665	0	0.352	-0.139	0.229	-0.185	0.22	-0.0091	1.1702	0.1462	0	0	0	0
Diisopropylamine	N	Training Set	0.05	0.24	0.08	0.73	1.054	0	0		0	16.61	35.015	-6.07	1.012	0	1	1.6201	0	0.344	0.36	0.839	1.631	3.536	-0.0003	0.0825	0.0022	0	4.5498	3.4702	2.534
Dimethyl ether	N	Training Set	0	0.27	0	0.41	0.449	0	0		0	9.23	12.813	-3.184	0.461	0	0	0.7144	0	0.312	0.302	0.516	0.761	1.207	0	0	0	0	4.4512	2.6507	1.25
Dimethyl sulfone	N	Training Set	0.59	1.7	0	0.76	0.671	0	0		0	42.52	20.692	-3.762	0.941	0	0	1.0773	0	1.015	0.422	1.323	1.022	2.046	-0.0047	1.1447	0.0428	0	9.7228	4.1352	0.874
Di-n-butyl ether	N	Training Set	0	0.25	0	0.45	1.295	0	0		0	9.23	41.655	-7.693	1.302	0	0	2.0041	0	0.331	0.309	0.5	0.757	1.201	0	0	0	0	4.3762	2.5981	1.208
Di-n-propyl ether	N	Training Set	0.01	0.25	0	0.45	1.013	0	0		0	9.23	32.041	-6.218	1.022	0	0	1.57	0	0.316	0.305	0.498	0.755	1.201	0	0	0	0	4.3647	2.589	1.206
Di-n-propyl sulfide	N	Training Set	0.36	0.38	0	0.32	1.118	0	0		0	25.3	38.547	-7.187	1.182	0	0	1.7411	0	0.325	0.18	0.257	0.275	0.347	0	0	0	0	1.9106	0.6477	0.102
Diphenyl sulfide	N	Training Set	1.63	1.2	0	0.3	1.488	0	0		2	25.3	57.007	-8.943	1.863	0	0	2.3387	0	0.499	-0.057	0.183	-0.036	0.084	0	0.0019	0	0	0	0	0
Diphenyl sulfone	N	Training Set	1.57	2.15	0	0.7	1.605	0	0		2	42.52	58.38	-8.533	2.183	0	0	2.5388	0	0.86	0.237	0.786	0.538	0.965	0	0.1255	0	0	5.0284	1.4901	0.148
Di-tert-butyl ketone	N	Training Set	0.04	0.56	0	0.51	1.392	0	0		0	9.23	41.731	-6.695	1.422	0	0	2.098	0	0.39	0.278	0.443	0.56	0.79	0	0	0	0	3.9476	1.8387	0.525
Ethanethiol	N	Training Set	0.39	0.42	0	0.2	0.5539	0	0		0	38.8	19.657	-4.378	0.621	0	0	0.8847	0	0.309	0.095	0.24	0.154	0.264	-0.0001	0.0994	0.0006	0	1.2945	0.3235	0.024
Ethene	N	Training Set	0.11	0.1	0	0.07	0.347	0	0		0	0	11.254	-2.799	0.281	0	0	0.5396	0	0.156	0.018	0.063	0.019	0.033	0	0	0	0	0.022	0	0
Ethyl benzoate	N	Training Set	0.69	0.85	0	0.46	1.214	0	0		1	26.3	42.529	-6.955	1.502	0	0	1.8922	0	0.558	0.235	0.511	0.496	0.742	0	0.0002	0	0	3.9371	1.5641	0.301
Ethyl isobutanoate	N	Training Set	0.03	0.55	0	0.47	1.028	0	0		0	26.3	32.241	-5.913	1.162	0	0	1.615	0	0.493	0.353	0.562	0.673	0.926	0	0	0	0	4.8676	2.0628	0.481
Ethyl n-butyl ether	N	Training Set	0.01	0.25	0	0.45	1.013	0	0		0	9.23	32.041	-6.209	1.022	0	0	1.568	0	0.324	0.313	0.517	0.789	1.265	0	0	0	0	4.4862	2.6981	1.281
Ethyl pentanoate	N	Training Set	0.05	0.58	0	0.45	1.169	0	0		0	26.3	37.048	-6.695	1.302	0	0	1.8268	0	0.495	0.339	0.55	0.649	0.901	0	0	0	0	4.74	1.9701	0.472
Ethyl phenyl ether	N	Training Set	0.68	0.7	0	0.32	1.057	0	0		1	9.23	37.741	-6.383	1.222	0	0	1.6342	0	0.436	0.099	0.257	0.172	0.269	0	0.0027	0	0	1.258	0.4392	0.079
Ethyl phenylacetate	N	Training Set	0.66	1.01	0	0.57	1.355	0	0		1	26.3	47.114	-7.587	1.642	0	0	2.1352	0	0.672	0.282	0.583	0.554	0.814	0	0	0	0	4.3196	1.6627	0.311
Ethyl propanoate	N	Training Set	0.09	0.58	0	0.45	0.888	0	0		0	26.3	27.434	-5.265	1.021	0	0	1.3868	0	0.509	0.354	0.588	0.697	0.978	0	0	0	0	5.0287	2.1703	0.535
Ethylbenzene	N	Training Set	0.61	0.51	0	0.15	0.998	0	0		1	0	36.215	-6.11	1.062	0	0	1.5455	0	0.279	0.019	0.088	0.012	0.034	0	0	0	0	0	0	0
Fluoromethane	N	Training Set	0.07	0.35	0	0.1	0.267	0	0		0	0	6.972	-2.219	0.34	0	0	0.461	0	0.231	0.059	0.128	0.061	0.083	0	0	0	0	0.1325	0	0
Formamide	N	Training Set	0.47	1.3	0.62	0.6	0.365	0	0		0	43.09	10.217	-2.238	0.45	0	2	0.5764	0	0.875	0.159	1.776	0.577	4.121	-0.0631	6.3718	3.5723	1.4162	9.3457	5.7454	2.711
Formanilide	N	Training Set	0.97	1.4	0.5	0.5	0.973	0	0		1	29.1	36.337	-5.639	1.211	0	1	1.5093	0	0.802	0.011	1.194	2.534	-0.042	-0.0435	4.4321	2.7726	1.414	5.4037	2.7141	0.957
Formic acid	N	Training Set	0.3	0.6	0.75	0.38	0.324	0	0		0	40.13	7.14	-2.056	0.46	1	0	0.5338	0	0.71	-0.211	1.401	-1.186	3.793	-0.0638	6.6245	4.6344	3.0446	3.7194	1.2331	0.202
Fumaricacid	N	Training Set	0.71	0.94	0.87	0.59	0.778	0	0		0	80.26	20.527	-4.04	1.161	2	0	1.2734	0	1.386	-0.608	3.064	-3.384	9.418	-0.1457	14.712	10.8298	7.4303	6.2955	1.9441	0.294
Furan	N	Training Set	0.37	0.53	0	0.13	0.536	0	0		1	13.14	18.708	-3.755	0.681	0	0	0.8759	0	0.343	-0.036	0.21	-0.034	0.158	-0.0007	0.2643	0.0033	0	0.2093	0.0123	0
Halothane	N	Training Set	0.1	0.38	0.15	0.05	0.741	0	0		0	0	24.585	-5.673	1.974	0	0	1.3443	0	0.274	-0.242	0.35	-0.474	0.67	-0.0318	3.1844	1.6938	0.5057	0	0	0
Hept-1-ene	N	Training Set	0.09	0.08	0	0.07	1.052	0	0		0	0	35.289	-6.526	0.982	0	0	1.631	0	0.19	0.044	0.068	0.039	0.041	0	0	0	0	0.0972	0.0001	0
Heptan-2-ol	N	Training Set	0.19	0.36	0.33	0.56	1.154	0	0		0	20.23	36.925	-6.613	1.162	1	0	1.7947	0	0.502	0.208	0.914	0.639	2.248	-0.0242	2.4378	1.2777	0.5057	5.5191	3.509	1.788
Heptan-4-ol	N	Training Set	0.18	0.36	0.33	0.56	1.154	0	0		0	20.23	36.925	-6.609	1.162	1	0	1.7876	0	0.461	0.22	0.807	0.629	1.946	-0.019	1.9152	1.0119	0.3879	5.1416	3.2231	1.59
Heptan-4-one	N	Training Set	0.11	0.66	0	0.51	1.111	0	0		0	17.07	35.963	-6.436	1.142	0	0	1.7182	0	0.443	0.342	0.57	0.749	1.109	0	0	0	0	5.0153	2.5263	0.882
Heptanal	N	Training Set	0.14	0.65	0	0.45	1.111	0	0		0	17.07	35.963	-6.413	1.142	0	0	1.7331	0	0.431	0.299	0.485	0.581	0.816	0	0	0	0	4.1367	1.7618	0.486
Heptanoic acid	N	Training Set	0.15	0.6	0.6	0.45	1.169	0	0		0	40.13	35.593	-6.507	1.302	1	0	1.837	0	0.712	-0.01	1.226	-0.542	3.004	-0.0519	5.1973	3.6057	2.2517	4.7041	1.8451	0.392
Hex- 1 -yne	N	Training Set	0.17	0.23	0.12	0.1	0.868	0	0		0	0	29.118	-5.687	0.821	0	0	1.3587	0	0.336	0.015	0.228	-0.029	0.223	-0.0077	0.818	0.2008	0.0174	0.1745	0	0
Hex-1-ene	N	Training Set	0.08	0.08	0	0.07	0.911	0	0		0	0	30.482	-5.784	0.842	0	0	1.4109	0	0.182	0.043	0.067	0.038	0.041	0	0	0	0	0.0943	0.0001	0
Hex-5-en-2-one	N	Training Set	0.28	0.75	0	0.57	0.927	0	0		0	17.07	30.682	-5.591	0.981	0	0	1.4589	0	0.564	0.336	0.619	0.711	1.056	0	0	0	0	4.8749	2.2867	0.724
Hexa-1,5diene	N	Training Set	0.19	0.2	0	0.1	0.868	0	0		0	0	30.008	-5.665	0.821	0	0	1.3592	0	0.281	0.062	0.114	0.056	0.065	0	0	0	0	0.0971	0.0001	0
Hexan-1-ol	N	Training Set	0.21	0.42	0.37	0.48	1.013	0	0		0	20.23	32.118	-6.002	1.022	1	0	1.5774	0	0.539	0.212	1.071	0.644	2.729	-0.0312	3.1378	1.8041	0.8052	6.0976	3.8972	2.065
Hexan-3-ol	N	Training Set	0.2	0.36	0.33	0.56	1.013	0	0		0	20.23	32.118	-5.868	1.022	1	0	1.5691	0	0.456	0.217	0.813	0.627	1.971	-0.0192	1.9457	1.0299	0.4011	5.1447	3.2347	1.609
Hexan-3-one	N	Training Set	0.14	0.66	0	0.51	0.97	0	0		0	17.07	31.156	-5.618	1.002	0	0	1.5001	0	0.456	0.37	0.62	0.824	1.229	0	0	0	0	5.4445	2.7795	1.01
Hexanoic acid	N	Training Set	0.17	0.6	0.6	0.45	1.028	0	0		0	40.13	30.786	-5.76	1.162	1	0	1.617	0	0.704	-0.012	1.223	-0.542	2.994	-0.052	5.1983	3.6044	2.2472	4.7003	1.836	0.396
Hydroquinone	N	Training Set	1	1	1.16	0.6	0.834	0	0		1	40.46	30.488	-4.801	1.101	2	0	1.3206	0	1	-0.393	1.802	-1.546	4.532	-0.0974	9.863	6.7342	4.0031	4.2349	1.772	0.388
Imidazole	N	Training Set	0.71	0.85	0.42	0.78	0.536	0	0		1	28.68	18.588	-3.479	0.681	0	1	0.8623	0	0.845	0.14	1.87	0.896	5.677	-0.0527	5.4333	3.5552	1.9832	7.7979	5.374	3.408
Indole	N	Training Set	1.2	1.12	0.44	0.22	0.946	0	0		2	15.79	38.299	-5.811	1.172	0	1	1.4828	0	0.631	-0.236	0.674	-0.699	1.289	-0.0412	4.1768	2.5419	1.2575	0.0346	0	0
Iodobenzene	N	Training Set	1.19	0.82	0	0.12	0.975	0	0		1	0	39.159	-6.969	2.04	0	0	1.4962	0	0.319	-0.073	0.117	-0.053	0.055	0	0.0132	0	0	0	0	0
Isobutanamide	N	Training Set	0.4	1.27	0.57	0.66	0.788	0	0		0	43.09	24.249	-4.345	0.871	0	1	1.2302	0	0.842	0.279	1.689	0.974	4.074	-0.0509	5.1243	2.7164	0.9795	9.683	6.1933	3.183
Isobutyl formate	N	Training Set	0.1	0.6	0	0.4	0.888	0	0		0	26.3	27.823	-5.177	1.021	0	0	1.4143	0	0.494	0.263	0.528	0.506	0.784	0	0.1367	0	0	4.0305	1.5424	0.307
Isobutyl methacrylate	N	Training Set	0.14	0.57	0	0.45	1.268	0	0		0	26.3	41.381	-7.151	1.422	0	0	2.0042	0	0.466	0.29	0.502	0.584	0.827	0	0.0002	0	0	4.3975	1.894	0.428
Isobutylbenzene	N	Training Set	0.58	0.47	0	0.15	1.28	0	0		1	0	45.829	-7.351	1.342	0	0	1.9968	0	0.285	0.018	0.084	0.01	0.031	0	0	0	0	0	0	0
Isopropyl benzoate	N	Training Set	0.66	0.76	0	0.48	1.354	0	0		1	26.3	47.336	-7.684	1.642	0	0	2.1294	0	0.537	0.222	0.474	0.46	0.682	0	0.0002	0	0	3.6556	1.4354	0.268
Isopropyl methacrylate	N	Training Set	0.14	0.57	0	0.45	1.127	0	0		0	26.3	36.574	-6.364	1.282	0	0	1.7657	0	0.439	0.281	0.483	0.567	0.8	0	0.0001	0	0	4.2702	1.8413	0.421
Isopropyl propanoate	N	Training Set	0.04	0.53	0	0.47	1.028	0	0		0	26.3	32.241	-5.934	1.162	0	0	1.6146	0	0.489	0.343	0.553	0.657	0.909	0	0	0	0	4.7419	2.0094	0.483
Isoxazole	N	Training Set	0.4	0.7	0	0.38	0.495	0	0		1	26.03	16.503	-3.223	0.691	0	0	0.8316	0	0.504	0.079	0.595	0.293	0.954	-0.0086	1.1877	0.1454	0.0003	2.9678	1.5612	0.625
Lacidipine	N	Training Set	1.65	2.34	0.32	1.8	3.62	0	0		2	90.93	124.436	-16.549	4.556	0	1	5.7059	0	1.455	0.584	1.871	1.026	3.714	-0.0315	3.2126	2.0561	1.2335	12.2706	5.6832	1.658
L-Menthol	N	Training Set	0.4	0.48	0.32	0.61	1.4677	0	0		1	20.23	49.232	-7.238	1.563	1	0	2.2419	0	0.471	0.234	0.821	0.653	2.041	-0.0177	1.809	0.9876	0.4478	5.1975	3.2538	1.67
Maleicacid	N	Training Set	0.5	1.16	1.14	0.75	0.78	0	0		0	80.26	20.527	-3.851	1.161	2	0	1.2319	0	1.239	-0.373	2.693	-2.662	8.858	-0.0974	9.9855	7.4186	5.4721	6.989	2.7165	0.639
Methane	N	Training Set	0	0	0	0	0.25	0	0		0	0	6.921	-2.14	0.16	0	0	0.3788	0	0.048	-0.003	0.006	-0.001	0.001	0	0	0	0	0	0	0
Methanol	N	Training Set	0.28	0.44	0.43	0.47	0.308	0	0		0	20.23	8.083	-2.237	0.32	1	0	0.4848	0	0.526	0.217	1.136	0.707	2.956	-0.0326	3.2771	1.9019	0.8595	6.3755	4.1669	2.3
Methyl 4-aminobenzoate	N	Training Set	1.08	1.52	0.32	0.59	1.172	0	0		1	52.32	42.126	-6.434	1.512	0	2	1.8362	0	0.947	0.049	1.219	0.116	2.114	-0.0455	4.6089	2.1818	0.6545	5.7317	2.62	0.699
Methyl acetate	N	Training Set	0.14	0.64	0	0.45	0.606	0	0		0	26.3	17.82	-3.781	0.741	0	0	0.9722	0	0.528	0.328	0.612	0.668	0.976	0	0	0	0	4.9844	2.0848	0.51
Methyl acrylate	N	Training Set	0.25	0.66	0	0.42	0.704	0	0		0	26.3	22.153	-4.397	0.861	0	0	1.1321	0	0.524	0.257	0.548	0.521	0.791	0	0.0143	0	0	4.1816	1.5824	0.294
Methyl butanoate	N	Training Set	0.11	0.6	0	0.45	0.888	0	0		0	26.3	27.434	-5.247	1.021	0	0	1.4039	0	0.507	0.33	0.566	0.641	0.905	0	0	0	0	4.7297	1.9455	0.446
Methyl ethyl sulfide	N	Training Set	0.39	0.38	0	0.28	0.695	0	0		0	25.3	24.126	-5.033	0.762	0	0	1.1005	0	0.309	0.153	0.253	0.247	0.324	0	0	0	0	1.7647	0.5749	0.078
Methyl formate	N	Training Set	0.19	0.68	0	0.38	0.465	0	0		0	26.3	13.402	-3.009	0.601	0	0	0.7606	0	0.508	0.233	0.55	0.464	0.768	0	0.1828	0	0	3.9156	1.3914	0.249
Methyl hexanoate	N	Training Set	0.08	0.6	0	0.45	1.169	0	0		0	26.3	37.048	-6.72	1.302	0	0	1.8411	0	0.522	0.333	0.568	0.644	0.91	0	0	0	0	4.743	1.959	0.454
Methyl methacrylate	N	Training Set	0.25	0.62	0	0.45	0.845	0	0		0	26.3	26.96	-5.072	1.001	0	0	1.3419	0	0.495	0.266	0.507	0.522	0.75	0	0.0005	0	0	4.0105	1.5742	0.294
Methyl nonanoate	N	Training Set	0.06	0.6	0	0.45	1.592	0	0		0	26.3	51.469	-8.941	1.723	0	0	2.4997	0	0.545	0.333	0.566	0.635	0.894	0	0	0	0	4.6895	1.918	0.429
Methyl phenyl sulfoxide	N	Training Set	1.1	1.8	0	0.91	1.08	0	0		1	45.53	40.792	-6.455	1.402	0	0	1.7131	0	0.807	0.543	1.339	1.823	3.328	0	0.1231	0	0	10.0845	6.5783	3.529
Methylamine	N	Training Set	0.25	0.35	0.16	0.58	0.349	0	0		0	27.64	10.886	-2.41	0.311	0	2	0.5298	0	0.487	0.556	1.576	3.167	7.681	-0.0038	0.5673	0.0474	0	7.3552	5.7591	4.371
m-Xylene	N	Training Set	0.62	0.52	0	0.16	0.998	0	0		1	0	36.374	-6.124	1.062	0	0	1.5364	0	0.278	0.029	0.091	0.022	0.037	0	0	0	0	0	0	0
n,n-Diethylacetamide	N	Training Set	0.3	1.3	0	0.78	1.07	0	0		0	20.31	34.052	-5.979	1.152	0	0	1.6665	0	0.635	0.663	1.256	1.995	3.414	0	0	0	0	10.265	6.837	3.767
n,n-Dimethylformamide	N	Training Set	0.37	1.31	0	0.74	0.647	0	0		0	20.31	20.02	-4.004	0.731	0	0	1.0209	0	0.645	0.619	1.203	1.781	2.99	0	0.0008	0	0	10.0295	6.3923	3.224
n-Acetylpyrrolidine	N	Training Set	0.55	1.63	0	0.92	0.961	0	0		1	20.31	29.524	-5.475	1.132	0	0	1.5155	0	0.678	0.77	1.444	2.356	4.075	0	0	0	0	11.6546	7.9427	4.532
Naphthacene	N	Training Set	2.85	1.7	0	0.33	1.823	0	0		4	0	78.96	-10.217	2.283	0	0	2.8398	0	0.55	-0.087	0.179	-0.057	0.071	0	0.0003	0	0	0	0	0
n-Butyl acetate	N	Training Set	0.07	0.6	0	0.45	1.028	0	0		0	26.3	32.241	-6.037	1.162	0	0	1.6182	0	0.534	0.366	0.62	0.724	1.032	0	0.0001	0	0	5.202	2.2602	0.583
n-Butyl acrylate	N	Training Set	0.18	0.62	0	0.42	1.126	0	0		0	26.3	36.574	-6.506	1.282	0	0	1.772	0	0.508	0.278	0.525	0.539	0.787	0	0.012	0	0	4.1822	1.6331	0.319
n-Butylamine	N	Training Set	0.22	0.35	0.16	0.61	0.772	0	0		0	27.64	25.307	-4.662	0.731	0	2	1.1815	0	0.484	0.516	1.421	2.794	6.635	-0.003	0.4701	0.0361	0	6.9442	5.3601	4.001
n-Butylparaben	N	Training Set	0.86	1.35	0.69	0.45	1.555	0	0		1	46.53	54.166	-8.298	1.942	1	0	2.4435	0	1.108	0.076	1.831	-0.334	4.445	-0.0596	6.058	4.2798	2.7856	8.2345	3.7374	1.152
n-Decane	N	Training Set	0	0	0	0	1.518	0	0		0	0	50.184	-8.837	1.423	0	0	2.3359	0	0.109	0.006	0.01	0.001	0.001	0	0	0	0	0	0	0
n-Dodecane	N	Training Set	0	0	0	0	1.799	0	0		0	0	59.798	-10.306	1.703	0	0	2.7714	0	0.125	0.008	0.012	0.001	0.001	0	0	0	0	0	0	0
n-Heptylamine	N	Training Set	0.2	0.35	0.16	0.61	1.195	0	0		0	27.64	39.728	-6.838	1.152	0	2	1.8352	0	0.507	0.523	1.427	2.803	6.616	-0.0027	0.4478	0.0331	0	6.9743	5.4574	4.091
n-Hexane	N	Training Set	0	0	0	0	0.954	0	0		0	0	30.956	-5.599	0.862	0	0	1.459	0	0.074	0.003	0.007	0	0.001	0	0	0	0	0	0	0
n-Hexyl acetate	N	Training Set	0.06	0.6	0	0.45	1.31	0	0		0	26.3	41.855	-7.519	1.442	0	0	2.056	0	0.55	0.37	0.623	0.728	1.039	0	0.0001	0	0	5.221	2.2742	0.592
Nitromethane	N	Training Set	0.31	0.95	0.06	0.31	0.424	0	0		0	49.66	18.253	-2.404	0.61	0	0	0.699	0	0.548	0.025	0.472	0.043	0.472	-0.0028	0.6399	0.0354	0.0003	1.2971	0.2159	0.006
n-Methyl benzamide	N	Training Set	0.95	1.44	0.35	0.73	1.114	0	0		1	29.1	39.438	-6.361	1.352	0	1	1.7249	0	0.826	0.26	1.363	0.793	3.148	-0.0321	3.2664	1.8978	0.8984	8.2838	5.0839	2.343
n-Methylacetamide	N	Training Set	0.4	1.3	0.4	0.72	0.647	0	0		0	29.1	19.537	-3.93	0.731	0	1	1.0036	0	0.754	0.487	1.569	1.548	4.015	-0.0281	2.8586	1.5714	0.6032	10.5782	6.9406	3.71
n-Methylaniline	N	Training Set	0.95	0.9	0.17	0.43	0.957	0	0		1	12.03	35.748	-5.782	1.072	0	1	1.469	0	0.514	-0.008	0.402	-0.081	0.511	-0.0158	1.6456	0.6882	0.1669	0.6864	0.2824	0.063
n-Methylbenzenesulfonamide	N	Training Set	1.1	1.5	0.3	0.82	1.238	0	0		1	54.55	42.338	-6.556	1.712	0	1	1.9553	0	0.982	0.16	1.21	0.133	2.009	-0.0336	3.4513	2.0745	0.9969	5.9741	1.7526	0.161
n-Methylpiperidine	N	Training Set	0.32	0.39	0	0.69	0.945	0	0		1	4.44	30.286	-5.443	0.992	0	0	1.4486	0	0.258	0.312	0.632	1.224	2.484	0	0	0	0	3.9996	2.9651	2.022
n-Nonane	N	Training Set	0	0	0	0	1.377	0	0		0	0	45.377	-8.083	1.283	0	0	2.1169	0	0.101	0.006	0.009	0.001	0.001	0	0	0	0	0	0	0
n-Nonylamine	N	Training Set	0.19	0.35	0.16	0.61	1.476	0	0		0	27.64	49.342	-8.32	1.433	0	2	2.2718	0	0.524	0.528	1.438	2.831	6.69	-0.0027	0.447	0.0328	0	7.0051	5.4862	4.117
n-Octane	N	Training Set	0	0	0	0	1.236	0	0		0	0	40.57	-7.339	1.142	0	0	1.8974	0	0.093	0.005	0.008	0.001	0.001	0	0	0	0	0	0	0
n-Octyl benzene	N	Training Set	0.58	0.48	0	0.15	1.844	0	0		1	0	65.057	-10.557	1.903	0	0	2.8659	0	0.326	0.027	0.093	0.015	0.035	0	0	0	0	0	0	0
Non-1-ene	N	Training Set	0.09	0.08	0	0.07	1.334	0	0		0	0	44.903	-8.011	1.262	0	0	2.0702	0	0.206	0.046	0.069	0.038	0.041	0	0	0	0	0.098	0	0
Nonan-1-ol	N	Training Set	0.19	0.42	0.37	0.48	1.435	0	0		0	20.23	46.539	-8.214	1.443	1	0	2.2313	0	0.563	0.218	1.077	0.657	2.745	-0.0311	3.1267	1.7948	0.7995	6.1335	3.9284	2.086
Nonan-5-one	N	Training Set	0.1	0.66	0	0.51	1.392	0	0		0	17.07	45.577	-7.916	1.422	0	0	2.1555	0	0.46	0.347	0.575	0.755	1.118	0	0	0	0	5.0481	2.5382	0.892
Nonanal	N	Training Set	0.15	0.65	0	0.45	1.392	0	0		0	17.07	45.577	-7.839	1.422	0	0	2.1712	0	0.446	0.3	0.487	0.581	0.817	0	0	0	0	4.1393	1.7622	0.485
n-Pentyl acetate	N	Training Set	0.07	0.6	0	0.45	1.169	0	0		0	26.3	37.048	-6.778	1.302	0	0	1.8374	0	0.542	0.368	0.621	0.723	1.03	0	0.0002	0	0	5.2142	2.2601	0.577
n-Pentylamine	N	Training Set	0.21	0.35	0.16	0.61	0.913	0	0		0	27.64	30.114	-5.347	0.872	0	2	1.3977	0	0.491	0.519	1.418	2.784	6.564	-0.0027	0.4482	0.0332	0	6.9532	5.4386	4.074
n-Propyl acetate	N	Training Set	0.09	0.6	0	0.45	0.888	0	0		0	26.3	27.434	-5.299	1.021	0	0	1.4005	0	0.529	0.363	0.62	0.722	1.031	0	0.0002	0	0	5.2096	2.2613	0.582
n-Propyl butanoate	N	Training Set	0.05	0.56	0	0.45	1.169	0	0		0	26.3	37.048	-6.755	1.302	0	0	1.8271	0	0.508	0.357	0.567	0.676	0.934	0	0	0	0	4.8615	2.0498	0.488
n-Propyl formate	N	Training Set	0.13	0.63	0	0.38	0.747	0	0		0	26.3	23.016	-4.519	0.881	0	0	1.19	0	0.504	0.274	0.547	0.521	0.803	0	0.1435	0	0	4.1542	1.5532	0.299
n-Propyl-4-aminobenzoate	N	Training Set	1.03	1.5	0.32	0.59	1.454	0	0		1	52.32	51.74	-7.899	1.792	0	2	2.2636	0	0.936	0.084	1.223	0.19	2.176	-0.0449	4.5447	2.1401	0.6367	6.0996	2.8569	0.81
n-Propylamine	N	Training Set	0.23	0.35	0.16	0.61	0.631	0	0		0	27.64	20.5	-3.924	0.591	0	2	0.9631	0	0.476	0.512	1.414	2.772	6.579	-0.0032	0.48	0.0381	0	6.9321	5.3453	3.986
n-Propylbenzene	N	Training Set	0.6	0.5	0	0.15	1.139	0	0		1	0	41.022	-6.853	1.202	0	0	1.7665	0	0.287	0.021	0.089	0.013	0.034	0	0	0	0	0	0	0
n-Tetradecane	N	Training Set	0	0	0	0	2.081	0	0		0	0	69.412	-11.582	1.984	0	0	3.2153	0	0.142	0.009	0.013	0.002	0.002	0	0	0	0	0	0	0
o-Cresol	N	Training Set	0.84	0.86	0.52	0.3	0.916	0	0		1	20.23	33.431	-5.373	1.081	1	0	1.4158	0	0.573	-0.077	0.681	-0.39	1.438	-0.0305	3.0751	2.036	1.1513	1.7066	0.657	0.108
Oct-1-yne	N	Training Set	0.16	0.23	0.12	0.1	1.15	0	0		0	0	38.732	-7.169	1.102	0	0	1.7997	0	0.351	0.018	0.229	-0.028	0.223	-0.0077	0.81	0.2005	0.0174	0.1735	0	0
Octadecanoic acid	N	Training Set	0.02	0.6	0.6	0.45	2.719	0	0		0	40.13	88.47	-14.501	2.845	1	0	4.2485	0	0.799	-0.001	1.232	-0.528	2.988	-0.0518	5.1821	3.5903	2.2369	4.7539	1.8548	0.395
Octan-2-ol	N	Training Set	0.16	0.36	0.33	0.56	1.295	0	0		0	20.23	41.732	-7.355	1.302	1	0	2.0119	0	0.511	0.208	0.92	0.633	2.264	-0.0245	2.4655	1.3013	0.5272	5.5245	3.5137	1.792
Octan-2-one	N	Training Set	0.11	0.68	0	0.51	1.252	0	0		0	17.07	40.77	-7.188	1.282	0	0	1.9496	0	0.483	0.356	0.619	0.794	1.192	0	0	0	0	5.346	2.6788	0.942
Octanoic acid	N	Training Set	0.15	0.6	0.6	0.45	1.31	0	0		0	40.13	40.4	-7.185	1.442	1	0	2.0507	0	0.721	-0.009	1.224	-0.536	2.988	-0.0519	5.189	3.5955	2.2392	4.7157	1.8384	0.387
o-Toluidine	N	Training Set	0.97	0.92	0.23	0.45	0.957	0	0		1	26.02	35.812	-5.546	1.072	0	2	1.464	0	0.608	-0.001	0.623	0.043	1.013	-0.0233	2.4266	0.8608	0.1542	1.8891	1.0796	0.509
Oxazole	N	Training Set	0.42	0.7	0	0.42	0.495	0	0		1	26.03	16.503	-3.291	0.691	0	0	0.8276	0	0.529	0.15	0.778	0.632	1.666	-0.0105	1.3485	0.1872	0.0008	4.2702	2.6442	1.419
Paraldehyde	N	Training Set	0.14	0.68	0	0.68	1.022	0	0		1	27.69	32.097	-5.738	1.322	0	0	1.6371	0	0.699	0.474	0.859	1.001	1.461	0	0.0012	0	0	7.3283	3.2816	0.915
p-Cresol	N	Training Set	0.82	0.87	0.57	0.31	0.916	0	0		1	20.23	33.431	-5.458	1.081	1	0	1.4276	0	0.632	-0.192	0.937	-0.801	2.29	-0.0491	4.9619	3.4108	2.0423	1.983	0.802	0.158
Pent-1-ene	N	Training Set	0.09	0.08	0	0.07	0.77	0	0		0	0	25.675	-5.051	0.701	0	0	1.1923	0	0.174	0.041	0.066	0.037	0.04	0	0	0	0	0.0953	0	0
Penta-1,4-diene	N	Training Set	0.19	0.2	0	0.1	0.727	0	0		0	0	25.201	-4.923	0.681	0	0	1.1357	0	0.282	0.054	0.12	0.054	0.07	0	0	0	0	0.1113	0.0001	0
Pentachlorobenzene	N	Training Set	1.33	0.96	0	0	1.329	0	0		1	0	51.492	-9.849	2.503	0	0	2.1885	0	0.233	-0.072	0.099	-0.083	0.091	-0.004	0.492	0.0712	0	0	0	0
Pentachloroethane	N	Training Set	0.65	0.66	0.17	0.06	1.002	0	0		0	0	35.746	-8.051	2.023	0	0	1.7146	0	0.275	-0.19	0.273	-0.348	0.479	-0.0244	2.4525	1.1784	0.2975	0	0	0
Pentamethylbenzene	N	Training Set	0.85	0.66	0	0.2	1.421	0	0		1	0	51.272	-7.813	1.483	0	0	2.156	0	0.296	0.063	0.105	0.055	0.057	0	0	0	0	0.0605	0	0
Pentan- 1-ol	N	Training Set	0.22	0.42	0.37	0.48	0.872	0	0		0	20.23	27.311	-5.258	0.882	1	0	1.3578	0	0.533	0.214	1.078	0.654	2.753	-0.0313	3.1447	1.8096	0.8089	6.1417	3.9378	2.091
Pentan-2-one	N	Training Set	0.14	0.68	0	0.51	0.829	0	0		0	17.07	26.349	-4.97	0.861	0	0	1.2911	0	0.461	0.354	0.621	0.801	1.208	0	0	0	0	5.3516	2.7059	0.971
Pentan-3-ol	N	Training Set	0.22	0.36	0.33	0.56	0.872	0	0		0	20.23	27.311	-5.132	0.882	1	0	1.3504	0	0.447	0.212	0.804	0.615	1.939	-0.0192	1.9388	1.0233	0.3944	5.0853	3.1766	1.573
Pentanal	N	Training Set	0.16	0.65	0	0.45	0.829	0	0		0	17.07	26.349	-4.987	0.861	0	0	1.2972	0	0.416	0.297	0.484	0.58	0.815	0	0	0	0	4.138	1.7582	0.484
Pentanoic acid	N	Training Set	0.21	0.6	0.6	0.45	0.888	0	0		0	40.13	25.979	-4.929	1.021	1	0	1.4067	0	0.695	-0.013	1.243	-0.555	3.091	-0.0527	5.2714	3.672	2.3062	4.7309	1.9212	0.456
Perylene	N	Training Set	3.26	1.76	0	0.4	1.954	0	0		5	0	87.652	-10.413	2.523	0	0	2.9915	0	0.567	-0.125	0.206	-0.093	0.099	0	0.1048	0	0	0	0	0
Phenyl acetate	N	Training Set	0.66	1.13	0	0.54	1.073	0	0		1	26.3	37.941	-6.203	1.362	0	0	1.6943	0	0.647	0.199	0.559	0.433	0.728	0	0.0302	0	0	3.609	1.3337	0.259
Phenyl benzoate	N	Training Set	1.33	1.42	0	0.47	1.54	0	0		2	26.3	57.843	-8.712	1.982	0	0	2.4184	0	0.681	0.106	0.489	0.291	0.564	0	0.0284	0	0	2.8145	0.9201	0.133
Phenylacetonitrile	N	Training Set	0.75	1.15	0	0.45	1.012	0	0		1	23.79	35.964	-5.85	1.172	0	0	1.5901	0	0.655	0.105	0.557	0.276	0.679	-0.0015	0.452	0.0078	0	2.8598	1.0396	0.207
Phenylsilane	N	Training Set	0.69	0.407	0	0.15	0.9621	0	0		1	0	29.686	-5.944	1.082	0	0	1.4749	0	0.242	-0.025	0.075	-0.016	0.029	0	0	0	0	0	0	0
Prop-2-en-1-ol	N	Training Set	0.34	0.46	0.38	0.48	0.547	0	0		0	20.23	17.223	-3.644	0.581	1	0	0.8595	0	0.613	0.167	1.095	0.489	2.641	-0.0333	3.358	1.985	0.9252	5.7203	3.5767	1.833
Propan-1-ol	N	Training Set	0.24	0.42	0.37	0.48	0.59	0	0		0	20.23	17.697	-3.774	0.601	1	0	0.9197	0	0.52	0.214	1.085	0.669	2.788	-0.0314	3.151	1.8127	0.8086	6.184	3.9851	2.13
Propane	N	Training Set	0	0	0	0	0.531	0	0		0	0	16.535	-3.693	0.441	0	0	0.8074	0	0.054	0.002	0.005	0	0.001	0	0	0	0	0	0	0
Propanoic acid	N	Training Set	0.23	0.65	0.6	0.45	0.606	0	0		0	40.13	16.365	-3.536	0.741	1	0	0.9576	0	0.691	-0.02	1.236	-0.545	3.029	-0.0523	5.2293	3.6279	2.2624	4.7704	1.8831	0.41
Propanone	N	Training Set	0.18	0.7	0.04	0.49	0.547	0	0		0	17.07	16.735	-3.519	0.581	0	0	0.8659	0	0.473	0.354	0.649	0.808	1.224	0	0	0	0	5.5702	2.7131	0.93
Propionamide	N	Training Set	0.44	1.3	0.55	0.68	0.647	0	0		0	43.09	19.442	-3.721	0.731	0	2	1.0041	0	0.855	0.301	1.738	1.058	4.216	-0.0509	5.1172	2.7072	0.9726	10.036	6.4965	3.379
Propionitrile	N	Training Set	0.16	0.9	0.02	0.36	0.545	0	0		0	23.79	16.284	-3.428	0.551	0	0	0.8491	0	0.468	0.218	0.487	0.435	0.695	0	0.0581	0	0	3.3325	1.3117	0.306
Propyne	N	Training Set	0.18	0.25	0.12	0.15	0.445	0	0		0	0	14.697	-3.472	0.401	0	0	0.7039	0	0.332	-0.007	0.243	-0.042	0.233	-0.0078	0.8249	0.2027	0.0177	0.1911	0.0001	0
p-Terphenyl	N	Training Set	2.04	1.48	0	0.3	1.932	0	0		3	0	77.314	-10.74	2.303	0	0	2.9518	0	0.652	-0.118	0.253	-0.101	0.128	0	0.1549	0	0	0	0	0
p-Toluidine	N	Training Set	0.92	0.95	0.23	0.45	0.957	0	0		1	26.02	35.812	-5.633	1.072	0	0	1.473	0	0.627	0.001	0.701	0.112	1.267	-0.0249	2.6654	0.9598	0.1862	2.3282	1.4288	0.749
Pyrazine	N	Training Set	0.63	0.95	0	0.62	0.634	0	0		1	25.78	22.032	-3.848	0.801	0	0	1.0032	0	0.569	0.366	0.904	1.162	2.143	0	0.0579	0	0	6.361	3.9025	2.083
Pyrene	N	Training Set	2.81	1.71	0	0.29	1.585	0	0		4	0	70.146	-8.787	2.023	0	0	2.4371	0	0.468	-0.08	0.151	-0.051	0.06	0	0	0	0	0	0	0
Pyrrole	N	Training Set	0.61	0.73	0.41	0.29	0.577	0	0		1	15.79	20.793	-3.955	0.671	0	1	0.9134	0	0.577	-0.159	0.713	-0.551	1.317	-0.0408	4.111	2.5067	1.1744	0.8738	0.0701	0
Quinazoline	N	Training Set	0.93	1.15	0	0.65	1.003	0	0		2	25.78	39.538	-5.714	1.302	0	0	1.5751	0	0.667	0.396	1.019	1.335	2.493	0	0.0606	0	0	7.0758	4.404	2.413
Quinoline	N	Training Set	1.27	0.97	0	0.54	1.044	0	0		2	12.89	41.743	-6.153	1.292	0	0	1.6272	0	0.534	0.242	0.717	0.978	1.931	0	0.0077	0	0	4.5469	2.9774	1.753
sec-Butylamine	N	Training Set	0.17	0.32	0.16	0.63	0.772	0	0		0	27.64	25.307	-4.559	0.731	0	2	1.1853	0	0.463	0.511	1.337	2.649	6.149	-0.0019	0.3196	0.0226	0	6.7462	5.2143	3.87
Styrene	N	Training Set	0.85	0.65	0	0.16	0.955	0	0		1	0	36.533	-6	1.042	0	0	1.4815	0	0.35	-0.02	0.123	-0.012	0.051	0	0.0001	0	0	0	0	0
Terephthalicacid	N	Training Set	1.1	1.21	1.03	0.56	1.147	0	0		1	80.26	36.476	-5.763	1.661	2	0	1.822	0	1.355	-0.415	2.726	-2.484	7.849	-0.1225	12.3645	8.9693	6.0443	6.9705	2.3485	0.415
Tetrachloroethene	N	Training Set	0.64	0.44	0	0	0.837	0	0		0	0	30.438	-7.219	1.658	0	0	1.4158	0	0.106	-0.022	0.019	-0.009	0.006	0	0	0	0	0	0	0
Tetradecanoic acid	N	Training Set	0.06	0.6	0.6	0.45	2.156	0	0		0	40.13	69.242	-11.648	2.284	1	0	3.3708	0	0.766	-0.004	1.228	-0.535	2.986	-0.0518	5.187	3.5954	2.2418	4.7201	1.8369	0.387
Tetrahydrofuran	N	Training Set	0.29	0.52	0	0.48	0.622	0	0		1	9.23	20.313	-4.033	0.721	0	0	1.0005	0	0.343	0.349	0.591	0.894	1.432	0	0	0	0	5.082	3.1104	1.519
Thiazole	N	Training Set	0.8	0.8	0	0.45	0.6	0	0		1	41.13	22.114	-4.387	0.851	0	0	0.9844	0	0.462	0.15	0.653	0.62	1.417	-0.0031	0.6309	0.0353	0	3.9255	2.4064	1.278
trans- 1,2-Dichloroethene	N	Training Set	0.43	0.41	0.09	0.05	0.592	0	0		0	0	20.846	-5.224	0.969	0	0	0.9822	0	0.251	-0.134	0.183	-0.172	0.193	-0.0088	1.0933	0.1453	0	0	0	0
Tribromomethane	N	Training Set	0.97	0.68	0.15	0.06	0.775	0	0		0	0	30.531	-7.122	2.527	0	0	1.2522	0	0.296	-0.196	0.285	-0.347	0.466	-0.024	2.4004	1.0996	0.239	0	0	0
Trichloroacetic acid	N	Training Set	0.59	1.33	0.95	0.28	0.832	0	0		0	40.13	25.984	-6.09	1.634	1	0	1.422	0	0.645	-0.568	1.573	-2.674	5.932	-0.0824	8.2424	6.5146	4.792	0.7321	0.0856	0
Trichloromethane	N	Training Set	0.43	0.49	0.15	0.02	0.617	0	0		0	0	21.309	-5.724	1.194	0	0	1.0585	0	0.266	-0.206	0.302	-0.387	0.528	-0.0265	2.6516	1.2589	0.2863	0	0	0
Tridecan- 1-ol	N	Training Set	0.17	0.42	0.37	0.48	1.999	0	0		0	20.23	65.767	-11.186	2.004	1	0	3.1044	0	0.595	0.223	1.08	0.665	2.746	-0.031	3.1136	1.7838	0.7911	6.1446	3.9401	2.095
Trimethyl phosphate	N	Training Set	0.11	1.1	0	1	0.971	0	0		0	54.57	28.454	-5.244	1.401	0	0	1.5475	0	0.834	0.521	1.015	1.157	1.779	0	0	0	0	7.8493	3.8481	1.375
Trimethylamine	N	Training Set	0.14	0.2	0	0.67	0.631	0	0		0	4.44	20.689	-4.111	0.591	0	0	0.9834	0	0.266	0.318	0.64	1.205	2.397	0	0	0	0	4.187	3.0313	2
Tri-n-propyl phosphate	N	Training Set	-0.05	1	0	1.15	1.816	0	0		0	54.57	57.296	-9.535	2.242	0	0	2.8946	0	0.755	0.654	1.158	1.762	3.13	0	0	0	0	9.3857	5.1815	2.232
Triphenylphospine	N	Training Set	2.2	1.86	0	0.59	2.1366	0	0		3	13.59	85.148	-11.463	2.623	0	0	3.3399	0	0.669	0.018	0.327	0.141	0.344	0	0	0	0	1.2457	0.5815	0.219
Undecan-1-ol	N	Training Set	0.18	0.42	0.37	0.48	1.717	0	0		0	20.23	56.153	-9.703	1.723	1	0	2.6679	0	0.579	0.22	1.079	0.661	2.744	-0.031	3.1191	1.7887	0.7951	6.1365	3.9332	2.09
Undecan-2-one	N	Training Set	0.1	0.68	0	0.51	1.674	0	0		0	17.07	55.191	-9.415	1.703	0	0	2.6094	0	0.507	0.36	0.626	0.803	1.207	0	0	0	0	5.3845	2.7131	0.963
