# Supplementary material for: In silico prediction of linear free energy relationship descriptors of neutral and ionic compounds
Source: Royal Society of Chemistry journal article supplement (doi:10.1039/c5ra13595h), 2015-01-01
Supplement: c5ra13595h2.pdf [file c5ra13595h2.pdf]

*Supporting information on*

***In silico* prediction of linear free energy relationship descriptors  
of neutral and ionic compounds**

Chul-Woong Cho<sup>a,b</sup>, Stefan Stolte<sup>a,c</sup>, Yeoung-Sang Yun<sup>b,\*</sup>, Ingo Krossing<sup>d,e,\*</sup>, Jorg Thöming<sup>a,\*</sup>

<sup>a</sup> Zentrum für Umweltforschung und nachhaltige Technologien (UFT), University of Bremen, Leobener Straße, 28359 Bremen, Germany

<sup>b</sup> School of Chemical Engineering, Chonbuk National University, Jeonju, Jeonbuk 561-756, Republic of Korea

<sup>c</sup> Department of Chemistry, UCniversity of Gdąnsk ul. Sobieskiego 18/19, 80-952, Gdąnsk, Poland

<sup>d</sup> Freiburger Materialforschungszentrum (FMF), University of Freiburg, Stefan-Meier-Str. 21, 79104 Freiburg, Germany

<sup>e</sup> Institut für Anorganische und Analytische Chemie, University of Freiburg, Albertstraße 21, 79104 Freiburg, Germany and FRIAS Fellow of the Section Soft Matter Science.

\*Corresponding author phone: +82(0)63 2702308 (Y.S.); +49(0)761 2036122(I.K); +49(0)421 21863300 (J.T); fax: +82(0)63 2702306 (Y.S.); +49 (0)761 2036001 (I.K), +49 (0)421 2188297 (J.T); e-mail: [ysyun@jbnu.ac.kr](mailto:ysyun@jbnu.ac.kr)(Y.S.), [krossing@uni-freiburg.de](mailto:krossing@uni-freiburg.de) (I.K.), [thoeming@uni-bremen.de](mailto:thoeming@uni-bremen.de) (J.T.)

**Fig. S1** Correlations of Abraham and calculated descriptors (A and B) according to Eqs. (5)-(6).

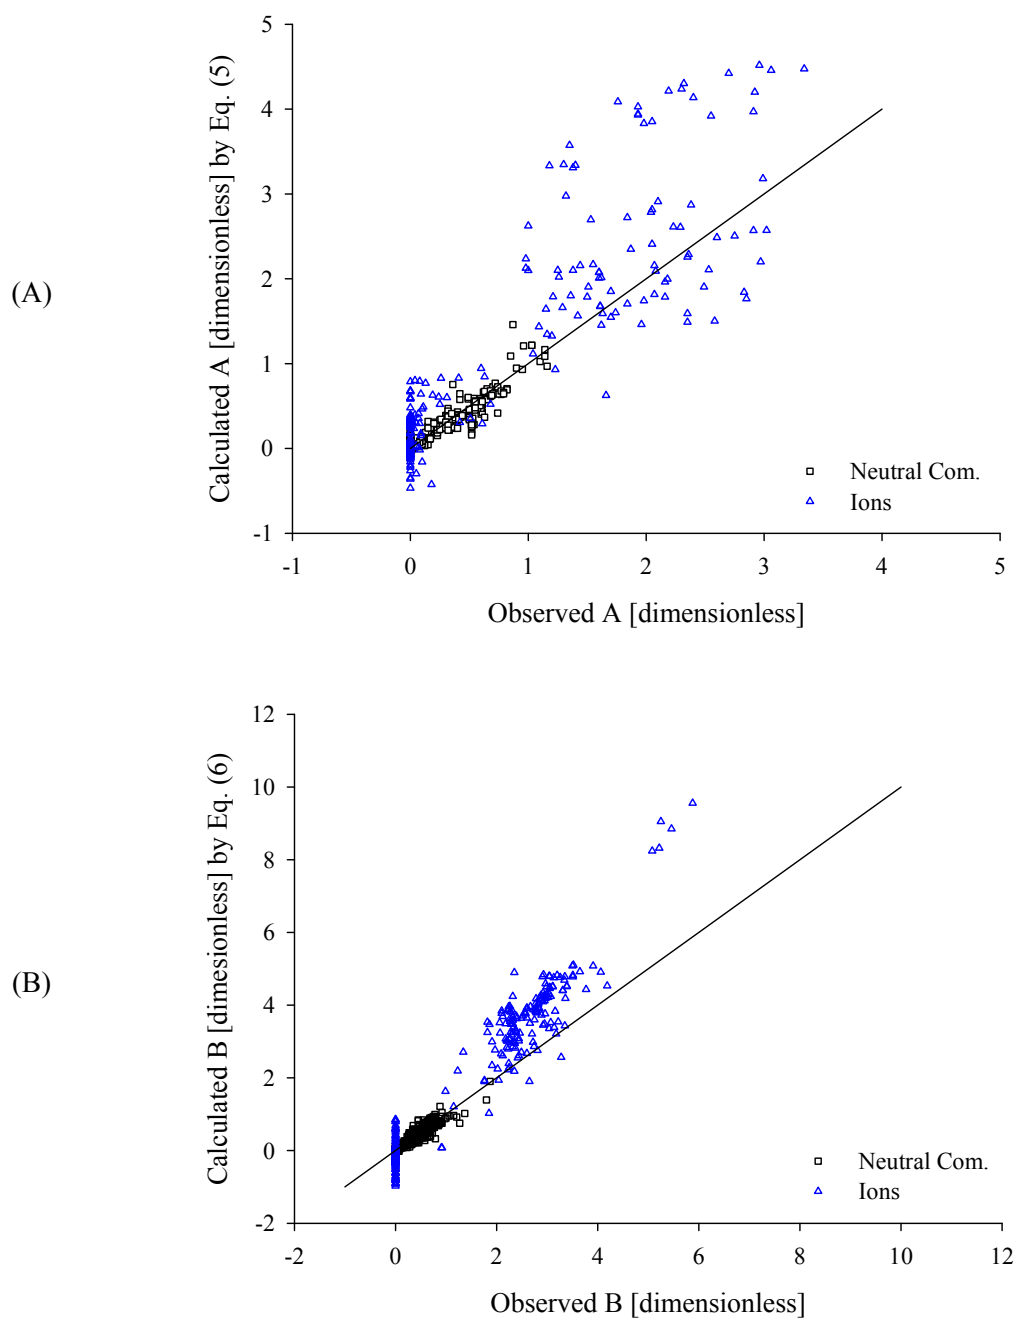

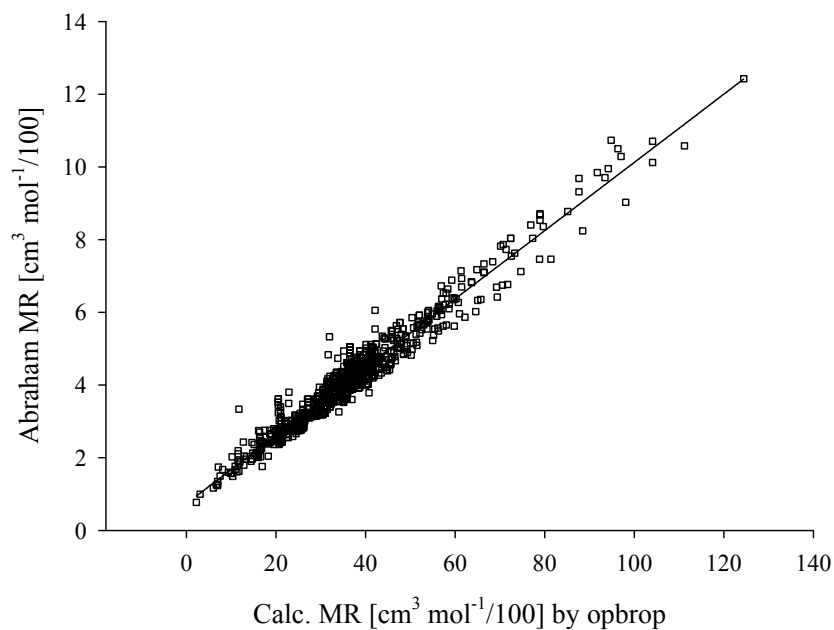

**Fig. S2** Correlation between Abraham molecular refraction (MR) and OBPROP molecular refraction ( $MR_{OBP}$ )

$$\text{Abraham MR [cm}^3 \text{ mol}^{-1}/100] = 0.09406 MR_{OBP} - 0.3245 \quad \text{Eq. (S1)}$$

$$R^2=0.958 \text{ SE}=0.32$$

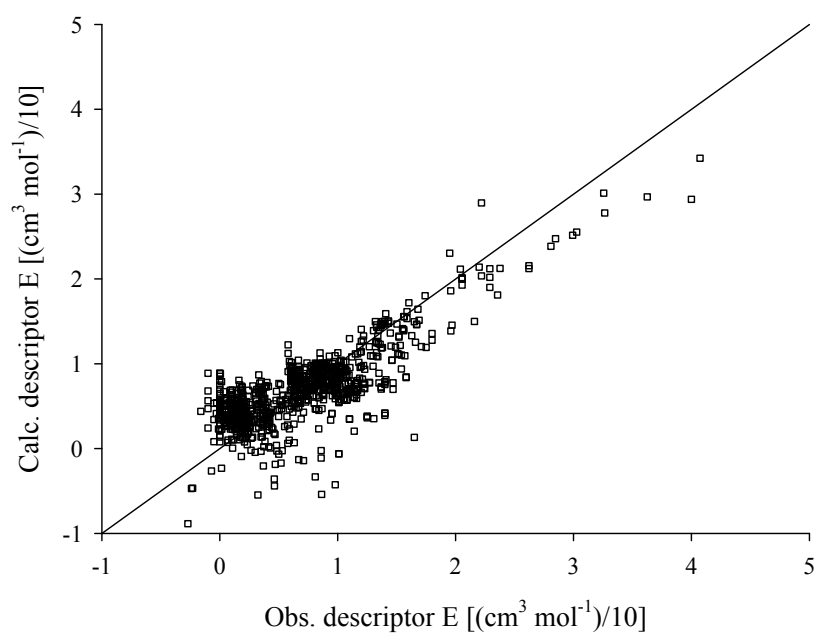

**Fig. S3** Correlation between Abraham E and calculated E by Eq. (8)

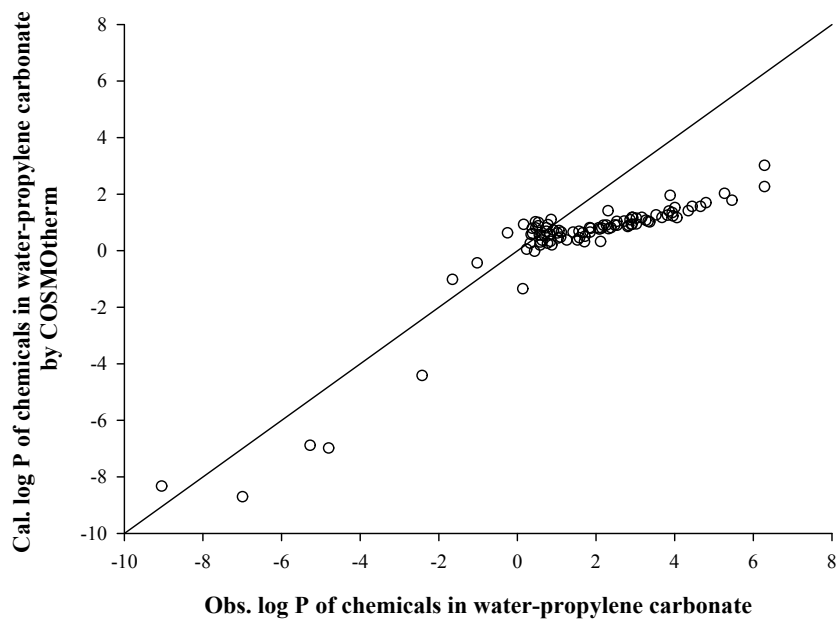

**Fig. S4** Correlation between observed and COSMOtherm-calculated log P of chemicals in water-propylene carbonate

**Table S1** Calculated (Calc.) and literature (AB) solute descriptors of outliers

|                                        | Obs.<br>S | Calc.<br>S | Obs<br>A | Calc.<br>A | Obs<br>B | Calc.<br>B | Obs<br>J <sup>+</sup> | Calc.<br>J <sup>+</sup> | Obs<br>J <sup>-</sup> | Calc.<br>J <sup>-</sup> |
|----------------------------------------|-----------|------------|----------|------------|----------|------------|-----------------------|-------------------------|-----------------------|-------------------------|
| <b>3-CyanoPy<sup>+</sup></b>           | 1.87      | 2.73       |          |            |          |            |                       |                         |                       |                         |
| <b>4-CyanoPy<sup>+</sup></b>           | 7.16      | 2.65       | 4.65     | 1.99       |          |            |                       |                         |                       |                         |
| <b>4-DimethylaminoPy<sup>+</sup></b>   | 6.71      | 1.83       | 3.75     | 1.16       |          |            |                       |                         |                       |                         |
| <b>morphine<sup>+</sup></b>            |           |            | 1.25     | 2.65       |          |            | 3.94                  | 2.04                    |                       |                         |
| <b>F<sup>-</sup></b>                   |           |            |          |            | 2.42     | 6.86       |                       |                         |                       |                         |
| <b>Phthalicacid<sup>1-</sup></b>       | 1.58      | 3.93       |          |            | 2.03     | 3.13       |                       |                         |                       |                         |
| <b>Succinicacid<sup>2-</sup></b>       |           |            |          |            | 6.24     | 4.84       |                       |                         |                       |                         |
| <b>Indomethacin</b>                    |           |            |          |            | 4.38     | 2.44       |                       |                         |                       |                         |
| <b>Meloxicam</b>                       |           |            |          |            | 4.18     | 2.69       |                       |                         |                       |                         |
| <b>Piroxicam</b>                       |           |            |          |            | 4.18     | 2.76       |                       |                         |                       |                         |
| <b>Phentolamine</b>                    |           |            |          |            | 4.13     | 2.75       |                       |                         |                       |                         |
| <b>Naphthoic acid</b>                  | 4.13      | 6.16       |          |            |          |            |                       |                         |                       |                         |
| <b>Bupivacaine</b>                     |           |            | 2.92     | 1.62       |          |            |                       |                         |                       |                         |
| <b>Ropivacaine</b>                     |           |            | 2.92     | 1.52       |          |            |                       |                         |                       |                         |
| <b>Verapamil</b>                       | 7.7       | 6.09       | 4.33     | 1.69       |          |            |                       |                         |                       |                         |
| <b>Donepezil</b>                       |           |            | 3.16     | 1.36       |          |            |                       |                         |                       |                         |
| <b>Rizatriptan</b>                     |           |            | 3.82     | 2.29       |          |            |                       |                         |                       |                         |
| <b>Tacrine</b>                         | 7.24      | 3.87       | 5.02     | 1.95       |          |            | -0.539                | 1.366                   |                       |                         |
| <b>Thioridazine</b>                    |           |            | 3.33     | 1.53       |          |            |                       |                         |                       |                         |
| <b>Astemizole<sup>+</sup></b>          |           |            | 3.39     | 1.81       |          |            |                       |                         |                       |                         |
| <b>Amiodaron<sup>+</sup></b>           | 4.95      | 6.09       | 2.78     | 1.02       |          |            |                       |                         |                       |                         |
| <b>2-AcetyPy<sup>+</sup></b>           | 5.78      | 1.42       | 3.89     | 1.25       |          |            |                       |                         |                       |                         |
| <b>2-BromoPy<sup>+</sup></b>           |           |            | 3.5      | 1.57       |          |            |                       |                         |                       |                         |
| <b>2-ChloroPy<sup>+</sup></b>          |           |            | 2.7      | 1.57       |          |            |                       |                         |                       |                         |
| <b>2,6-Dibromo-nitroPX<sup>-</sup></b> | 8.7       | 6.14       |          |            |          |            |                       |                         | 3.95                  | 2.38                    |
| <b>Ph4B<sup>-</sup></b>                | 2.72      | 12.52      |          |            |          |            |                       |                         | -0.188                | 4.29                    |
| <b>Tamoxifen<sup>+</sup></b>           |           |            | 2.53     | 0.70       |          |            |                       |                         | 4.15                  | 2.25                    |
| <b>Minoxidil</b>                       |           |            |          |            |          |            | 3.94                  | 2.21                    |                       |                         |
| <b>Ph4As<sup>+</sup></b>               |           |            |          |            |          |            | 1.602                 | 0.581                   |                       |                         |
| <b>Quinidine<sup>+</sup></b>           |           |            |          |            |          |            | 4.150                 | 2.244                   |                       |                         |

**Table S2.** COSMOtherm-predicted, Calculated by Eq. (24) and observed the transfer of compounds from water to propylene carbonate. The observed data were obtained from ref 1.

| Chemical               | Obs.  | Calc. by Eq. (24) | Cosmothem-predicted |
|------------------------|-------|-------------------|---------------------|
| Hydrogen               | 0.26  | 0.26              | 0.02                |
| Nitrogen               | 0.60  | 0.71              | 0.17                |
| Carbon dioxide         | 0.71  | 0.72              | 0.50                |
| Hydrogen sulfide       | 0.65  | 0.63              | 0.33                |
| Sulfer dioxide         | 0.85  | 0.43              | 0.55                |
| Carbonyl Sulfide       | 1.14  | 1.28              | 0.62                |
| Water                  | -1.63 | 0.16              | -1.05               |
| Methane                | 0.86  | 0.77              | 0.30                |
| Ethane                 | 1.44  | 1.23              | 0.62                |
| Propane                | 1.87  | 1.71              | 0.62                |
| Butane                 | 2.40  | 2.19              | 0.78                |
| Pentane                | 2.92  | 2.66              | 0.89                |
| Hexane                 | 3.35  | 3.15              | 1.00                |
| Heptane                | 3.84  | 3.62              | 1.22                |
| Octane                 | 4.37  | 4.10              | 1.38                |
| Nonane                 | 4.68  | 4.58              | 1.53                |
| Dodecane               | 5.29  | 5.06              | 1.99                |
| Isobutane              | 2.34  | 2.20              | 0.75                |
| 2-Methylpentane        | 3.29  | 3.14              | 1.04                |
| 2,4-Dimethylpentane    | 3.70  | 3.62              | 1.14                |
| 2,5-Dimethylhexane     | 3.96  | 4.10              | 1.31                |
| 2,3,4-Trimethylpentane | 3.98  | 4.03              | 1.20                |
| Cyclohexane            | 2.85  | 2.74              | 0.86                |
| Methylcyclopentane     | 2.94  | 2.84              | 0.90                |
| Methylcyclohexane      | 3.39  | 3.22              | 0.98                |
| Ethylcyclohexane       | 4.08  | 3.71              | 1.14                |
| Ethene                 | 1.12  | 0.83              | 0.45                |
| Propene                | 1.69  | 1.25              | 0.60                |
| Hex-1-ene              | 2.89  | 3.15              | 1.06                |
| Oct-1-ene              | 3.88  | 3.63              | 1.37                |
| 2-Methylbut-2-ene      | 2.50  | 2.19              | 0.88                |
| 1,3-Butadiene          | 1.89  | 1.55              | 0.76                |
| 2-Methylbuta-1,3-diene | 2.29  | 1.99              | 0.87                |
| Cyclohexene            | 2.56  | 2.23              | 0.86                |
| Benzene                | 2.21  | 1.97              | 0.86                |

|                                |       |       |       |
|--------------------------------|-------|-------|-------|
| Toluene                        | 2.55  | 2.39  | 1.00  |
| Ethylbenzene                   | 2.95  | 2.88  | 1.14  |
| o-Xylene                       | 3.05  | 2.80  | 1.11  |
| m-Xylene                       | 2.94  | 2.82  | 1.14  |
| p-Xylene                       | 2.95  | 2.83  | 1.14  |
| Diethyl ether                  | 0.61  | 1.09  | 0.27  |
| Diisopropyl ether              | 1.04  | 1.96  | 0.59  |
| Methyl tert-butylether         | 0.79  | 1.39  | 0.23  |
| Ethyl tert-butyl ether         | 1.06  | 1.83  | 0.41  |
| Methyl tert-pentyl ether       | 1.28  | 1.83  | 0.34  |
| Isopropyl tert-butyl ether     | 1.60  | 2.37  | 0.42  |
| Butanone                       | 0.46  | 0.60  | -0.06 |
| Pentan-2-one                   | 0.90  | 1.04  | 0.17  |
| Dichloromethane                | 1.59  | 1.56  | 0.65  |
| Trichloromethane               | 2.09  | 2.25  | 0.78  |
| 1,2-Dichloroethane             | 1.86  | 1.82  | 0.78  |
| tert-Butyl chloride            | 2.83  | 1.99  | 0.82  |
| tert-Butyl bromide             | 3.05  | 2.11  | 0.91  |
| Iodoethane                     | 2.17  | 1.61  | 0.77  |
| Triethylamine                  | -0.23 | 2.46  | 0.60  |
| Tetramethyltin                 | 3.19  | 3.25  | 1.14  |
| Biphenyl                       | 4.47  | 3.92  | 1.53  |
| Anthracene                     | 4.82  | 4.48  | 1.66  |
| Pyrene                         | 5.48  | 4.94  | 1.75  |
| Benzil                         | 4.03  | 3.82  | 1.49  |
| Monouron                       | 2.11  | 2.84  | 0.73  |
| Diuron                         | 2.74  | 3.56  | 1.01  |
| Diphenylsulfone                | 3.55  | 3.40  | 1.23  |
| 2-Methylbenzoic acid           | 1.73  | 1.65  | 0.29  |
| 2-Methoxybenzoic acid          | 1.55  | 1.69  | 0.34  |
| 4-Chlorobenzoic acid           | 2.14  | 1.89  | 0.29  |
| 4-Nitrobenzoic acid            | 1.74  | 1.67  | 0.47  |
| <b>Anion</b>                   |       |       | --    |
| Cl <sup>-</sup>                | -6.97 | -6.93 | -8.74 |
| Br <sup>-</sup>                | -5.25 | -5.45 | -6.92 |
| I <sup>-</sup>                 | -2.40 | -3.22 | -4.45 |
| ClO <sub>4</sub> <sup>-</sup>  | 0.16  | -1.86 | -1.38 |
| N <sub>3</sub> <sup>-</sup>    | -4.78 | -5.72 | -7.02 |
| Ph <sub>4</sub> B <sup>-</sup> | 6.31  | 7.09  | 2.23  |

|                                 |       |       |       |
|---------------------------------|-------|-------|-------|
| Acetate <sup>-</sup>            | -9.03 | -8.21 | -8.36 |
| Picrate <sup>-</sup>            | -1.00 | -0.83 | -0.47 |
| <b>Cation</b>                   |       |       | --    |
| BuNH <sub>3</sub> <sup>+</sup>  | 0.35  | 1.01  | 0.23  |
| Et <sub>4</sub> N <sup>+</sup>  | 2.33  | 1.51  | 1.38  |
| Pr <sub>4</sub> N <sup>+</sup>  | 3.91  | 2.84  | 1.92  |
| 2-MethylPy <sup>+</sup>         | 0.55  | 0.34  | 0.85  |
| 3-MethylPy <sup>+</sup>         | 0.40  | 0.60  | 0.76  |
| 4-MethylPy <sup>+</sup>         | 0.49  | 0.84  | 0.77  |
| 2,3-DimethylPy <sup>+</sup>     | 0.56  | 0.92  | 0.96  |
| 2,4-DimethylPy <sup>+</sup>     | 0.48  | 1.12  | 0.99  |
| 2,6-DimethylPy <sup>+</sup>     | 0.88  | 0.76  | 1.07  |
| 3,4-DimethylPy <sup>+</sup>     | 0.80  | 1.25  | 0.89  |
| 3,5-DimethylPy <sup>+</sup>     | 0.18  | 1.25  | 0.90  |
| 2-ChloroPy <sup>+</sup>         | 0.76  | 0.78  | 0.77  |
| 3-ChloroPy <sup>+</sup>         | 0.94  | 1.01  | 0.69  |
| 3-CyanoPy <sup>+</sup>          | 0.58  | 1.05  | 0.52  |
| 4-CyanoPy <sup>+</sup>          | 0.41  | 1.24  | 0.58  |
| 2-AminoPy <sup>+</sup>          | 0.37  | 0.73  | 0.54  |
| 3-AminoPy <sup>+</sup>          | 0.76  | 0.72  | 0.65  |
| 4-AminoPy <sup>+</sup>          | 1.08  | 0.87  | 0.68  |
| Ph <sub>4</sub> As <sup>+</sup> | 6.31  | 5.34  | 2.98  |



**Table S3.** Calculated [by Eq. (25)] and observed the transfer of compounds from water to sulfolane. The observed data were obtained in ref 2.

| Chemical               | Obs. | Calc. |
|------------------------|------|-------|
| Carbon dioxide         | 0.55 | 0.55  |
| Nitrous oxide          | 0.58 | 1.13  |
| Sulfur dioxide         | 0.87 | 0.58  |
| Hydrogen sulfide       | 0.77 | 0.75  |
| Ethane                 | 1.09 | 1.13  |
| Butane                 | 2.11 | 2.09  |
| Pentane                | 2.72 | 2.55  |
| Hexane                 | 3.23 | 3.03  |
| Heptane                | 3.78 | 3.52  |
| Octane                 | 4.11 | 4.00  |
| Nonane                 | 4.49 | 4.48  |
| Dodecane               | 5.05 | 4.96  |
| 2,2,4-Trimethylpentane | 3.83 | 3.92  |
| Cyclohexane            | 2.71 | 2.98  |
| Cycloheptane           | 2.88 | 3.48  |
| Cyclooctane            | 3.43 | 3.94  |
| Methylcyclopentane     | 2.79 | 3.02  |
| Methylcyclohexane      | 3.23 | 3.45  |
| 1-Butene               | 1.91 | 1.62  |
| Isobutene              | 1.79 | 1.58  |
| trans-2-Butene         | 1.97 | 1.63  |
| cis-2-Butene           | 2.08 | 1.59  |
| 1,3-Butadiene          | 1.77 | 1.47  |
| 1-Hexene               | 2.69 | 2.56  |
| 1-Heptene              | 3.12 | 3.04  |
| 1-Octene               | 3.66 | 3.52  |
| Cyclohexene            | 2.47 | 2.47  |
| 1-Hexyne               | 2.61 | 2.08  |
| 1-Heptyne              | 3.31 | 2.55  |
| 1-Octyne               | 3.61 | 3.03  |
| Dichloromethane        | 1.74 | 1.57  |
| Chloroform             | 2.25 | 2.34  |
| Carbon tetrachloride   | 2.76 | 2.96  |
| Chloroethane           | 1.33 | 1.08  |
| 1,2-Dichloroethane     | 2.08 | 1.79  |

|                         |       |       |
|-------------------------|-------|-------|
| Trichloroethene         | 2.58  | 2.73  |
| Acetonitrile            | 0.46  | 0.22  |
| Diethyl ether           | 0.57  | 0.80  |
| Diisopropyl ether       | 0.90  | 1.67  |
| Methyl tert-butyl ether | 0.41  | 1.04  |
| Ethyl tert-butyl ether  | 0.90  | 1.49  |
| Tetrahydrofuran         | 0.16  | 0.60  |
| Dioxane                 | -0.27 | 0.01  |
| Methylformate           | 0.33  | 0.30  |
| Methyl acetate          | 0.37  | 0.25  |
| Ethyl acetate           | 0.71  | 0.47  |
| Propyl acetate          | 1.12  | 0.84  |
| Butyl acetate           | 1.59  | 1.23  |
| Acetaldehyde            | -0.43 | 0.19  |
| Isobutyraldehyde        | 0.57  | 0.79  |
| Acetone                 | -0.08 | 0.09  |
| Butanone                | 0.31  | 0.30  |
| 4-Methyl-2-pentanone    | 1.18  | 1.29  |
| Methanol                | -0.94 | -0.49 |
| Ethanol                 | -0.70 | -0.37 |
| Butan-1-ol              | 0.25  | 0.32  |
| 2-Propanol              | -0.52 | -0.06 |
| 2-Methyl-1-propanol     | 0.28  | 0.58  |
| Allyl alcohol           | 0.01  | -0.12 |
| Nitromethane            | 0.92  | 0.73  |
| Benzene                 | 2.31  | 2.25  |
| Toluene                 | 2.62  | 2.67  |
| Ethylbenzene            | 2.99  | 3.14  |
| o-Xylene                | 3.08  | 3.08  |
| m-Xylene                | 2.95  | 3.10  |
| p-Xylene                | 2.93  | 3.11  |
| Chlorobenzene           | 2.95  | 3.03  |
| Pyridine                | 0.39  | 0.82  |
| Benzoic acid            | 1.89  | 1.51  |
| 2-Methylbenzoic acid    | 2.21  | 1.82  |
| 3-Methylbenzoic acid    | 2.26  | 1.83  |
| 2-Chlorobenzoic acid    | 2.19  | 2.11  |

|                                   |        |        |
|-----------------------------------|--------|--------|
| 4-Chlorobenzoic acid              | 2.69   | 2.17   |
| 2-Nitrobenzoic acid               | 1.66   | 2.28   |
| 4-Nitrobenzoic acid               | 2.74   | 2.08   |
| <b>Cation</b>                     |        | --     |
| Ph4AS <sup>+</sup>                | 6.23   | 6.23   |
| <b>Anion</b>                      |        | --     |
| Cl <sup>-</sup>                   | -9.24  | -9.52  |
| Br <sup>-</sup>                   | -6.96  | -7.32  |
| I <sup>-</sup>                    | -3.59  | -3.98  |
| N3 <sup>-</sup>                   | -6.96  | -7.65  |
| Ph4B <sup>-</sup>                 | 6.23   | 6.66   |
| Benzoate <sup>-</sup>             | -8.83  | -9.33  |
| 3-Methylbenzoate <sup>-</sup>     | -9.10  | -9.15  |
| 4-Methylbenzoate <sup>-</sup>     | -9.37  | -9.20  |
| 4-tert-Butylbenzoate <sup>-</sup> | -8.04  | -8.14  |
| 3-CF3-benzoate <sup>-</sup>       | -7.69  | -8.12  |
| 3-Cyanobenzoate <sup>-</sup>      | -8.74  | -8.90  |
| 4-Cyanobenzoate <sup>-</sup>      | -8.49  | -8.87  |
| 3-Acetylbenzoate <sup>-</sup>     | -9.25  | -9.19  |
| 4-Acetylbenzoate <sup>-</sup>     | -9.14  | -9.23  |
| Terephthalic acid <sup>-</sup>    | -9.01  | -8.73  |
| 4-Aminobenzoate <sup>-</sup>      | -10.60 | -9.08  |
| 3-HO-benzoate <sup>-</sup>        | -10.81 | -9.01  |
| 4-Ho-benzoate <sup>-</sup>        | -10.44 | -9.00  |
| 3-Meo-benzoate <sup>-</sup>       | -9.44  | -9.15  |
| 3-Pho-benzoate <sup>-</sup>       | -6.70  | -6.75  |
| 4-Pho-benzoate <sup>-</sup>       | -5.80  | -6.83  |
| 3-SH-benzoate <sup>-</sup>        | -8.46  | -8.25  |
| 4-SH-benzoate <sup>-</sup>        | -8.79  | -8.37  |
| 4-SMe-benzoate <sup>-</sup>       | -8.84  | -8.40  |
| 3-SO2Me-benzoate <sup>-</sup>     | -9.38  | -10.00 |
| 4-SO2Me-benzoate <sup>-</sup>     | -9.53  | -9.92  |
| 3-So2NH2-benzoate <sup>-</sup>    | -10.14 | -9.67  |
| 4-SO2NH2-benzoate <sup>-</sup>    | -10.19 | -9.68  |
| 3-Fluorobenzoate <sup>-</sup>     | -9.06  | -8.90  |
| 4-Fluorobenzoate <sup>-</sup>     | -9.58  | -8.99  |
| 3-Chlorobenzoate <sup>-</sup>     | -8.16  | -8.43  |
| 4-Chlorobenzoate <sup>-</sup>     | -8.03  | -8.46  |

|                              |       |       |
|------------------------------|-------|-------|
| 3-Bromobenzoate <sup>-</sup> | -7.53 | -8.13 |
| 4-Bromobenzoate <sup>-</sup> | -7.67 | -8.15 |
| 3-Iodobenzoate <sup>-</sup>  | -7.07 | -7.71 |
| 4-Iodobenzoate <sup>-</sup>  | -7.42 | -8.28 |
| 3-Nitrobenzoate <sup>-</sup> | -8.47 | -8.42 |
| 4-Nitrobenzoate <sup>-</sup> | -7.79 | -8.39 |

**Table S4.** Calculated [by Eq. (26)] and observed the transfer of compounds from water to ethylene glycol. The observed data were obtained in ref 1.

| Chemical                  | Obs.  | Calc. |
|---------------------------|-------|-------|
| 1,4-Dioxane               | 3.27  | 3.75  |
| 1-nitronaphthalene        | 6.65  | 6.91  |
| 2,3,4-Trimethylpentane    | 0.77  | 1.48  |
| 2,4,4-trimethyl-1-pentene | 1.08  | 1.79  |
| 2-hydroxybenzoic acid     | 7.43  | 7.87  |
| 2-Methylbuta-1,3-diene    | 0.82  | 1.17  |
| 2-Methylpropane           | 0.14  | 0.19  |
| 2-Nitrophenol             | 5.02  | 5.35  |
| 3-Chlorophenol            | 7.37  | 4.81  |
| 3-methyl-1-butene         | 0.56  | 1.02  |
| 4-Ethylphenol             | 6.55  | 5.16  |
| 4-hydroxybenzoic acid     | 8.53  | 8.46  |
| Acenaphthene              | 5.22  | 5.95  |
| Acetanilide               | 8.02  | 6.18  |
| Ammonia                   | 2.25  | -0.44 |
| Aniline                   | 5.52  | 4.29  |
| anisole                   | 3.23  | 3.37  |
| Anthracene                | 6.57  | 6.67  |
| Benzene                   | 2.03  | 2.09  |
| Benzoic acid              | 6.86  | 5.97  |
| Benzonitrile              | 4.26  | 3.81  |
| Benzyl alcohol            | 6.09  | 4.93  |
| Biphenyl                  | 5.23  | 5.18  |
| Bromobenzene              | 3.22  | 3.05  |
| Buta-1,3-diene            | 0.99  | 0.81  |
| Butanone                  | 2.64  | 2.45  |
| Carbon dioxide            | 0.10  | -0.39 |
| cis-2-hexene              | 0.91  | 1.42  |
| Cyclohexane               | 1.13  | 1.53  |
| Cyclohexene               | 1.39  | 2.18  |
| Ethane                    | -0.63 | -0.48 |
| Ethanol                   | 3.48  | 2.11  |
| Ethene                    | -0.37 | -0.08 |
| Ethylbenzene              | 2.49  | 2.84  |

|                          |       |       |
|--------------------------|-------|-------|
| Ethylcyclohexane         | 1.52  | 2.17  |
| Ethyne                   | 0.50  | 0.25  |
| Fluoranthrene            | 7.50  | 7.98  |
| Fluorene                 | 5.73  | 6.24  |
| Hept-1-ene               | 1.07  | 1.76  |
| hexafluorobenzene        | 1.16  | 1.09  |
| Hydrogen                 | -1.75 | -1.56 |
| ibuprofen                | 8.97  | 7.98  |
| Isopropylbenzene         | 2.59  | 3.15  |
| Methane                  | -1.14 | -0.86 |
| methyl-4-hydroxybenzoate | 8.58  | 7.90  |
| Methylcyclohexane        | 1.20  | 1.84  |
| m-Xylene                 | 2.51  | 2.94  |
| Naphthalene              | 4.27  | 4.40  |
| naproxen                 | 11.79 | 10.23 |
| n-Butane                 | 0.21  | 0.21  |
| n-Decane                 | 1.97  | 2.29  |
| n-Heptane                | 0.85  | 1.25  |
| n-Hexane                 | 0.56  | 0.82  |
| Nitrobenzene             | 4.44  | 4.33  |
| Nitrogen                 | -1.81 | -0.76 |
| Nitromethane             | 3.09  | 2.53  |
| Nitrous oxide            | -0.13 | -1.14 |
| n-Nonane                 | 1.43  | 1.94  |
| n-Octane                 | 1.14  | 1.59  |
| n-Propylbenzene          | 2.68  | 3.19  |
| Oct-1-ene                | 1.33  | 2.10  |
| o-Xylene                 | 2.67  | 2.94  |
| Phenanthrene             | 6.28  | 6.71  |
| Phenol                   | 6.39  | 4.39  |
| Propane                  | 0.03  | -0.13 |
| Propene                  | 0.33  | 0.36  |
| p-Xylene                 | 2.49  | 2.93  |
| Pyrene                   | 7.62  | 8.18  |
| Tetramethyltin           | 0.90  | 0.51  |
| Toluene                  | 2.35  | 2.52  |
| trans-2-hexene           | 0.79  | 1.38  |

|                                 |       |       |
|---------------------------------|-------|-------|
| trans-Stilbene                  | 6.30  | 6.09  |
| <b>Anion</b>                    |       | --    |
| 2-Aminobenzoate <sup>-</sup>    | -1.27 | -0.45 |
| 2-Chlorobenzoate <sup>-</sup>   | -0.92 | -0.77 |
| 2-Nitrobenzoate <sup>-</sup>    | -1.35 | -0.02 |
| 3-Chlorobenzoate <sup>-</sup>   | -0.37 | -0.82 |
| 3-Hydroxylbenzoate <sup>-</sup> | -0.90 | 0.26  |
| 3-Nitrobenzoate <sup>-</sup>    | -0.70 | 0.64  |
| 4-Aminobenzoate <sup>-</sup>    | -1.55 | -1.41 |
| 4-Chlorobenzoate <sup>-</sup>   | -0.26 | -0.96 |
| 4-hydroxybenzoate <sup>-</sup>  | -0.97 | 0.20  |
| 4-Nitrobenzoate <sup>-</sup>    | -0.77 | 0.60  |
| Acetate <sup>-</sup>            | -2.42 | -4.15 |
| Benzoate <sup>-</sup>           | -1.23 | -1.49 |
| Br <sup>-</sup>                 | -1.62 | -2.97 |
| Chloroacetate <sup>-</sup>      | -1.89 | -1.61 |
| Cl <sup>-</sup>                 | -2.07 | -5.65 |
| I <sup>-</sup>                  | -1.10 | 1.25  |
| Ph4B <sup>-</sup>               | 3.60  | 2.42  |
| Phenylacetate <sup>-</sup>      | -1.31 | -1.13 |
| <b>Cation</b>                   |       | --    |
| Et2NH2 <sup>+</sup>             | -0.07 | 0.81  |
| Et3NH <sup>+</sup>              | 0.06  | -0.76 |
| EtNH3 <sup>+</sup>              | -0.15 | 1.59  |
| Me2NH2 <sup>+</sup>             | -0.50 | 0.77  |
| Me3NH <sup>+</sup>              | -0.35 | -1.38 |
| MeNH3 <sup>+</sup>              | -0.32 | 1.64  |
| Ph4AS <sup>+</sup>              | 3.60  | 2.53  |

## References

1. M. H. Abraham, W. E. Acree Jr, *New J. Chem.* 2010, **34**, 2298-2305.
2. T. W. Stephens, N. E. Rosa, M. Saifullah, S. Ye, V. Chou, A. N. Quay, W. E. Acree Jr., M. H. Abraham, *Fluid Phase Equilib.* 2011, **309**, 30-35.
